# Supplementary material
Source: publisher figshare collection journal article supplement (https://acs.figshare.com/ndownloader/files/5194603)
Supplement: Supplementary file 1 [file 5194603]

# Efficient Nazarov Cyclizations of 2-Alkoxy-1,4-pentadien-3-ones

Guangxin Liang, Stefan N. Gradl and Dirk Trauner\*

*Center for New Directions in Organic Synthesis, Department of Chemistry, University of California—Berkeley, Berkeley, California 94720*

## Supporting Information

**General.** Unless otherwise noted, infrared spectra (IR) were obtained on NaCl plates with a ATI Mattson Gemini FTIR spectrometer. Proton NMR spectra ( $^1\text{H}$  NMR) were recorded at 400 MHz in  $\text{CDCl}_3$  and carbon NMR spectra ( $^{13}\text{C}$  NMR) were recorded at 100 MHz in  $\text{CDCl}_3$  on Bruker AMX-400 spectrometer. High resolution mass spectra (HRMS) were obtained on VG ProSpec Mass Spectrometer using electron impact (EI) at 70 eV unless otherwise noted. Preparative HPLC was performed on a Varian preparative HPLC instrument with a dynamax Microsorb Si column (ID: 21.4 mm, particle size 8  $\mu\text{m}$ , length: 25 cm, pore size: 60  $\text{\AA}$ ) with a linear gradient of 8% EtOAc in hexanes to 25% EtOAc in hexanes over a course of 30 min with a flow rate of 21.6 mL/min. Enantioselectivities were measured on chiral analytical HPLC with a CHIRALPAK AD column (250 X 4.6 mm) with a linear gradient of 2% isopropanol in hexanes to 20% isopropanol in hexanes over a course of 18 min with a flow rate of 1.0 mL/min. The products of the Nazarov electrocyclizations were purified and confirmed by NMR spectra before enantioselectivities were measured. The peaks of two enantiomers were located based on the retention times derived from racemic mixture. Integration was done manually and the estimated error of e.e. is  $\pm 1\%$ .

All reaction mixtures were magnetically stirred in oven-dried glassware under a blanket of nitrogen. External bath temperatures were used to record all reaction mixture temperatures. Analytical thin layer chromatography (TLC) was carried out on Merck silica gel 60 F<sub>254</sub> TLC plates. TLC visualization was accomplished using 254 nm UV light or charring solutions of  $\text{KMnO}_4$ . Flash chromatography was performed on ICN siliTech 32-63 D 60  $\text{\AA}$  silica gel according to the procedure of Still.<sup>1</sup>

Tetrahydrofuran (THF), dichloromethane ( $\text{CH}_2\text{Cl}_2$ ) were dried according to the procedure described by Bergman.<sup>2</sup> Benzene was distilled from  $\text{CaH}_2$  immediately prior to use. Acetonitrile (MeCN) was distilled from  $\text{P}_2\text{O}_5$  immediately prior to use. Extracts were dried over anhydrous  $\text{Na}_2\text{SO}_4$  and solvents were removed with a rotary evaporator at aspirator pressure.

The preparation of compounds **8a**, **8b**, **8c**, **8e**, **8g**, **8h**, **8j**, **8k**, **8l**, **8m** and **8n** followed the same general procedure. A representative procedure was demonstrated below.

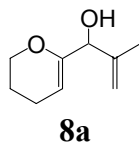

**1-(5,6-Dihydro-4H-pyran-2-yl)-2-methyl-prop-2-en-1-ol (8a)** To 0.500 g (5.94 mmol) of dihydropyrene in 0.3 mL of THF was added 3.84 mL of a 1.7 M solution of *t*-BuLi in pentane dropwise at  $-78\text{ }^{\circ}\text{C}$ . The reaction mixture was warmed to  $0\text{ }^{\circ}\text{C}$ . After the reaction mixture was stirred for 30 min at  $0\text{ }^{\circ}\text{C}$  and treated with 0.2 mL of THF, the reaction mixture was cooled back to  $-78\text{ }^{\circ}\text{C}$  and was treated with 0.480g (6.53 mmol) of 2-methylpropenal dropwise. The reaction mixture was allowed to warm to  $0\text{ }^{\circ}\text{C}$ . Upon reaching  $0\text{ }^{\circ}\text{C}$ , the reaction was quenched with water (50 mL) and diluted with EtOAc (100 mL). The two layers were separated and the aqueous layer was extracted with EtOAc (2 X 40 mL). The combined organic layers were washed with brine (80 mL), dried, filtered and concentrated *in vacuo*. The product was purified by column chromatography (EtOAc: hexanes = 1:6) to afford 0.503 g (55%) of **8a** as colorless oil.  $R_f$  0.20 (EtOAc: hexanes = 1:6); IR 3427(br), 2928, 2873, 2849,  $1675\text{ cm}^{-1}$ ;  $^1\text{H}$  NMR (300 MHz,  $\text{CDCl}_3$ )  $\delta_{\text{H}}$  5.08 (s, 1 H), 4.94 (m, 1 H), 4.81 (t, 1 H,  $J = 3.8\text{ Hz}$ ), 4.34 (d, 1 H,  $J = 5.9\text{ Hz}$ ), 3.98 (m, 2 H), 2.22 (d, 1 H,  $J = 6.1\text{ Hz}$ ), 2.03 (m, 2 H), 1.80 (m, 2 H), 1.71 (s, 3 H);  $^{13}\text{C}$  NMR (75 MHz,  $\text{CDCl}_3$ )  $\delta_{\text{C}}$  152.87, 144.67, 111.46, 98.01, 76.00, 66.49, 22.28, 19.92, 18.80; HRMS calcd for  $\text{C}_9\text{H}_{14}\text{O}_2$  ( $\text{M}$ ) $^{+}$  154.0994, found: 154.0990.

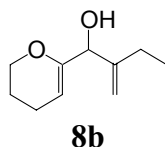

**1-(5,6-Dihydro-4H-pyran-2-yl)-2-ethyl-prop-2-en-1-ol (8b)** Yield: 83%; Colorless oil.  $R_f$  0.14 (EtOAc: hexanes = 1:9); IR 3434(br), 2965, 2932, 2876, 2849,  $1675$ ,  $1650\text{ cm}^{-1}$ ;  $^1\text{H}$  NMR (500 MHz,  $\text{CDCl}_3$ )  $\delta_{\text{H}}$  5.13 (s, 1 H), 4.92 (s, 1 H), 4.79 (t, 1 H,  $J = 3.7\text{ Hz}$ ), 4.35 (d, 1 H,  $J = 6.0\text{ Hz}$ ), 4.01 (m, 1 H), 3.93 (m, 1 H), 2.36 (d, 1 H,  $J = 6.0\text{ Hz}$ ), 2.01 (m, 4 H), 1.76 (m, 2 H), 1.03 (t, 3 H,  $J = 7.4\text{ Hz}$ );  $^{13}\text{C}$  NMR (125 MHz,  $\text{CDCl}_3$ )  $\delta_{\text{C}}$  153.12, 150.34, 108.99, 98.02, 75.45, 66.41, 24.82, 22.25, 19.92, 12.12; HRMS calcd for  $\text{C}_{10}\text{H}_{16}\text{O}_2$  ( $\text{M}$ ) $^{+}$  168.1150, found: 168.1153.

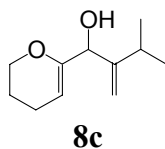

**1-(5,6-Dihydro-4H-pyran-2-yl)-2-isopropyl-prop-2-en-1-ol (8c)** Yield: 75%; Colorless oil;  $R_f$  0.21 (EtOAc: hexanes = 1:9); IR 3433(br), 2959, 2930, 2871, 2850,  $1675$ ,  $1649\text{ cm}^{-1}$ ;  $^1\text{H}$  NMR (500 MHz,  $\text{CDCl}_3$ )  $\delta_{\text{H}}$  5.10 (s, 1 H), 4.91 (s, 1 H), 4.76 (t, 1 H,  $J = 3.7\text{ Hz}$ ), 4.34 (d, 1 H,  $J = 6.0\text{ Hz}$ ), 3.95 (m, 1 H), 3.88 (m, 1 H), 2.47 (d, 1 H,  $J = 6.2\text{ Hz}$ ), 2.22 (m, 1 H), 1.97 (m, 2 H), 1.72 (m, 2 H), 0.99 (d, 3 H,  $J = 6.8\text{ Hz}$ ), 0.96 (d, 3 H,  $J = 6.8\text{ Hz}$ );

$^{13}\text{C}$  NMR (125 MHz,  $\text{CDCl}_3$ )  $\delta_{\text{C}}$  155.23, 153.40, 107.73, 98.04, 74.60, 66.29, 29.93, 22.92, 22.22, 19.93; HRMS calcd for  $\text{C}_{11}\text{H}_{18}\text{O}_2(\text{M})^+$  182.1307 found: 182.1305.

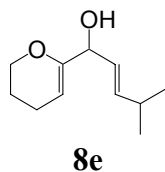

**1-(5,6-Dihydro-4H-pyran-2-yl)-4-methyl-pent-2-en-1-ol (8e)** Yield: 91%; Colorless oil.  $R_f$  0.21 (EtOAc: hexanes = 1:9); IR 3440(br), 2957, 2931, 2869, 2851, 1677 $\text{cm}^{-1}$ ;  $^1\text{H}$  NMR  $\delta_{\text{H}}$  5.67 (ddd, 1 H,  $J = 15.4, 6.4, 1.0$  Hz), 5.48 (ddd, 1 H,  $J = 15.4, 6.4, 1.0$  Hz), 4.73 (t, 1 H,  $J = 3.7$  Hz), 4.36 (t, 1 H,  $J = 5.3$  Hz), 4.00 (m, 2 H), 2.28 (m, 1 H), 2.18 (d, 1 H,  $J = 4.8$  Hz), 2.00 (m, 2 H), 1.79 (m, 2 H), 0.97 (dd, 6 H,  $J = 6.8, 1.2$  Hz);  $^{13}\text{C}$  NMR  $\delta_{\text{C}}$  154.37, 140.30, 126.16, 96.87, 73.22, 66.41, 30.66, 22.34, 22.19, 22.13, 19.90; HRMS calcd for  $\text{C}_{11}\text{H}_{18}\text{O}_2(\text{M})^+$  182.1307, found: 182.1308

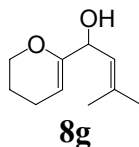

**1-(5,6-Dihydro-4H-pyran-2-yl)-3-methyl-but-2-en-1-ol (8g)** Yield: 87%; Colorless oil.  $R_f$  0.21 (EtOAc: hexanes = 1:6); IR 3412 (br), 2967, 2928, 2875, 2850, 1675  $\text{cm}^{-1}$ ;  $^1\text{H}$  NMR  $\delta_{\text{H}}$  5.32 (dt, 1 H,  $J = 8.6, 1.3$  Hz), 4.75 (t, 1 H,  $J = 3.8$  Hz), 4.65 (q, 1 H,  $J = 4.3$  Hz), 4.03 (t, 2 H,  $J = 5.1$  Hz), 2.00 (m, 3 H), 1.80 (m, 2 H), 1.73 (d, 3 H,  $J = 1.0$  Hz), 1.69 (d, 3 H,  $J = 1.0$  Hz);  $^{13}\text{C}$  NMR  $\delta_{\text{C}}$  154.45, 136.75, 124.17, 96.43, 69.24, 66.46, 25.88, 22.36, 19.90, 18.19; HRMS calcd for  $\text{C}_{10}\text{H}_{16}\text{O}_2(\text{M})^+$  168.1150, found: 168.1155

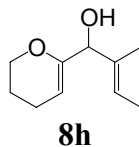

**1-(5,6-Dihydro-4H-pyran-2-yl)-2-methyl-but-2-en-1-ol (8h)** Yield: 92%; Colorless oil.  $R_f$  0.23 (EtOAc: hexanes = 1:6); IR 3435 (br), 2928, 2861, 1677  $\text{cm}^{-1}$ ;  $^1\text{H}$  NMR (500 MHz,  $\text{CDCl}_3$ )  $\delta_{\text{H}}$  5.56 (q, 1 H,  $J = 6.7$  Hz), 4.76 (t, 1 H,  $J = 3.7$  Hz), 4.29 (d, 1 H,  $J = 4.7$  Hz), 3.99 (m, 1 H), 3.94 (m, 1 H), 2.22 (d, 1 H,  $J = 5.2$  Hz), 2.01 (m, 2 H), 1.77 (m, 2 H), 1.61 (d, 3 H,  $J = 6.8$  Hz), 1.58 (s, 3 H);  $^{13}\text{C}$  NMR (125 MHz,  $\text{CDCl}_3$ )  $\delta_{\text{C}}$  153.41, 135.18, 121.37, 96.99, 77.10, 66.34, 22.34, 19.88, 13.21, 12.08; HRMS calcd for  $\text{C}_{10}\text{H}_{16}\text{O}_2(\text{M})^+$  168.1150, found: 168.1149.

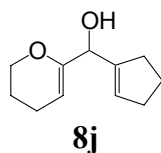

**Cyclopent-1-enyl-(5,6-dihydro-4H-pyran-2-yl)-methanol (8j)** Yield: 90%; Colorless oil.  $R_f$  0.10 (EtOAc: hexanes = 1:6); IR 3434(br), 2945, 2847  $\text{cm}^{-1}$ ;  $^1\text{H}$  NMR (400 MHz,  $\text{C}_6\text{H}_6$ )  $\delta_{\text{H}}$  5.76 (m, 1 H), 4.75 (t, 1 H,  $J = 3.6$  Hz), 4.63 (d, 1 H,  $J = 3.5$  Hz), 3.67 (m, 2 H), 2.42 (m, 3 H), 2.28 (m, 2 H), 1.78 (m, 4 H), 1.40 (m, 2 H);  $^{13}\text{C}$  NMR (100 MHz,  $\text{C}_6\text{H}_6$ )  $\delta_{\text{C}}$  154.73, 145.34, 126.19, 96.26, 72.22, 66.14, 32.69, 32.43, 23.75, 22.65, 20.17; HRMS calcd for  $\text{C}_{11}\text{H}_{16}\text{O}_2(\text{M})^+$  180.1150, found: 180.1150.

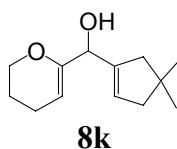

**(5,6-Dihydro-4H-pyran-2-yl)-(4,4-dimethylcyclopent-1-en-1-yl)-methanol (8k)** Yield: 85%; Colorless oil.  $R_f$  0.27 (EtOAc: hexanes = 1:6); IR 3432 (br), 2947, 2864, 1675  $\text{cm}^{-1}$ ;  $^1\text{H}$  NMR (500 MHz,  $\text{CDCl}_3$ )  $\delta_{\text{H}}$  5.53 (s, 1 H), 4.73 (t, 1 H,  $J = 1.7$  Hz), 4.42 (s, 1 H), 3.96 (m, 2 H), 2.32 (d, 1 H,  $J = 4.3$  Hz), 2.13 (d, 2 H,  $J = 1.7$  Hz), 2.07 (s, 2 H), 1.99 (m, 2 H), 1.76 (m, 2 H), 1.04 (s, 6 H);  $^{13}\text{C}$  NMR (125 MHz,  $\text{CDCl}_3$ )  $\delta_{\text{C}}$  153.37, 142.79, 124.74, 97.18, 72.22, 66.28, 47.34, 47.09, 38.55, 29.69, 29.64, 22.34, 19.89; HRMS calcd for  $\text{C}_{13}\text{H}_{20}\text{O}_2(\text{M})^+$  208.1463, found: 208.1460.

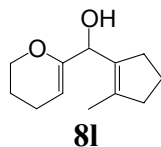

**(5,6-Dihydro-4H-pyran-2-yl)-(2-methylcyclopent-1-en-1-yl)-methanol (8l)** Yield: 85%; Colorless oil.  $R_f$  0.32 (EtOAc: hexanes = 1:6); IR 3428 (br), 2944, 2928, 2847, 1678  $\text{cm}^{-1}$ ;  $^1\text{H}$  NMR  $\delta_{\text{H}}$  4.83 (s, 1 H), 4.74 (t, 1 H,  $J = 3.7$  Hz), 4.02 (m, 2 H), 2.47 (m, 1 H), 2.33 (m, 3 H), 2.14 (s, 1 H), 2.03 (m, 2 H), 1.80 (m, 4 H), 1.70 (s, 3 H);  $^{13}\text{C}$  NMR  $\delta_{\text{C}}$  153.75, 136.61, 134.32, 95.66, 68.75, 66.33, 38.90, 31.79, 22.42, 21.58, 19.88, 13.96; HRMS calcd for  $\text{C}_{12}\text{H}_{18}\text{O}_2(\text{M})^+$  194.1307, found: 194.1311

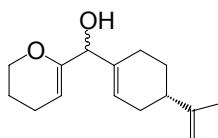

**8m**

**(5,6-Dihydro-4H-pyran-2-yl)-(4-isopropenyl-cyclohex-1-enyl)-methanol (8m)** Yield: 88%; Colorless oil.  $R_f$  0.27 (EtOAc: hexanes = 1:6); IR 3434(br), 2917, 1676, 1643 $\text{cm}^{-1}$ ;  $^1\text{H}$  NMR  $\delta_{\text{H}}$  5.83 (s, 1 H), 4.81 (q, 1 H,  $J = 3.5$  Hz), 4.73 (s, 2 H), 4.35 (d, 1 H,  $J = 7.2$  Hz), 4.02 (m, 2 H), 2.10 (m, 8 H), 1.84 (m, 3 H), 1.75 (s, 3 H), 1.46 (m, 1 H);  $^{13}\text{C}$  NMR  $\delta_{\text{C}}$  153.38, 153.22, 149.89, 137.13, 136.83, 123.34, 122.57, 108.49, 97.48, 97.12, 75.90, 75.74, 66.36, 41.05, 30.48, 27.49, 25.29, 24.89, 22.35, 20.69, 19.91; HRMS calcd for  $\text{C}_{15}\text{H}_{22}\text{O}_2$  ( $\text{M}$ ) $^+$  234.1620, found: 234.1618

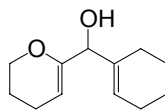

**8n**

**Cyclohex-1-enyl-(5,6-dihydro-4H-pyran-2-yl)-methanol (8n)** Yield: 94%; Colorless oil.  $R_f$  0.27 (EtOAc: hexanes = 1:6); IR 3425(br), 2927, 2854, 1677 $\text{cm}^{-1}$ ;  $^1\text{H}$  NMR (500 MHz,  $\text{CDCl}_3$ )  $\delta_{\text{H}}$  5.76 (s, 1 H), 4.76 (t, 1 H,  $J = 3.4$  Hz), 4.26 (d, 1 H,  $J = 4.8$  Hz), 4.02 (m, 1 H), 3.95 (m, 1 H), 2.14 (d, 1 H,  $J = 5.5$  Hz), 2.03 (m, 4 H), 1.93 (m, 2 H), 1.79 (m, 2 H), 1.57 (m, 4 H);  $^{13}\text{C}$  NMR (125 MHz,  $\text{CDCl}_3$ )  $\delta_{\text{C}}$  153.35, 137.25, 123.50, 97.23, 76.15, 66.34, 24.97, 24.56, 22.57, 22.36, 19.91; HRMS calcd for  $\text{C}_{12}\text{H}_{18}\text{O}_2$  ( $\text{M}$ ) $^+$  194.1307, found: 194.1305

The preparation of compounds **8d**, **8f**, and **8i** followed the same general procedure. A representative procedure was demonstrated below.

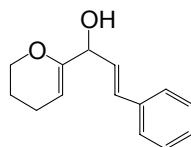

**8d**

**1-(5,6-Dihydro-4H-pyran-2-yl)-3-phenyl-prop-2-en-1-ol (8d)** To 0.500 g (5.94 mmol) of dihydropyranone in 0.3 mL of THF was added 3.84 mL of a 1.7 M solution of *t*-BuLi in pentane dropwise at  $-78$   $^{\circ}\text{C}$ . The reaction mixture was warmed to  $0$   $^{\circ}\text{C}$ . After the reaction mixture was stirred for 30 min at  $0$   $^{\circ}\text{C}$ , it was treated with 0.862 g (6.53 mmol) of 3-phenyl-propenal in 1 mL of THF dropwise. The reaction mixture was kept at  $0$   $^{\circ}\text{C}$  for 1 h before it was quenched with water (50 mL) and diluted with EtOAc (100 mL). The two layers were separated and the aqueous layer was extracted with EtOAc (2 X 40 mL). The combined organic layers were washed with brine (80 mL), dried, filtered and concentrated *in vacuo*. The product was purified by column chromatography (EtOAc:

hexanes = 1:6) to afford 0.770 g (60%) of **8d** as lightly yellow oil.  $R_f$  0.17 (EtOAc: hexanes = 1:6); IR 3432(br), 3081, 3057, 3026, 2930, 2876, 2848, 1674 $\text{cm}^{-1}$ ;  $^1\text{H}$  NMR  $\delta_{\text{H}}$  7.39 (d, 2 H,  $J = 7.3$  Hz), 7.31 (t, 2 H,  $J = 7.3$  Hz), 7.23 (t, 1 H,  $J = 7.3$  Hz), 6.66 (d, 1 H,  $J = 6.0$  Hz), 6.31 (dd, 1 H,  $J = 15.9, 6.3$  Hz), 4.85 (t, 1 H,  $J = 3.7$  Hz), 4.62 (t, 1 H,  $J = 5.4$  Hz), 4.05 (m, 2 H), 2.30 (d, 1 H,  $J = 5.3$  Hz), 2.04 (m, 2 H), 1.83 (m, 2 H);  $^{13}\text{C}$  NMR  $\delta_{\text{C}}$  153.78, 136.62, 131.23, 128.78, 128.48, 127.63, 126.57, 97.47, 73.24, 66.51, 22.29, 19.89; HRMS calcd for  $\text{C}_{14}\text{H}_{16}\text{O}_2(\text{M})^+$  216.1150, found: 216.1153

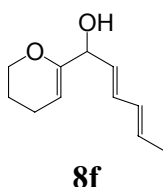

**1-(5,6-Dihydro-4H-pyran-2-yl)-hexa-2,4-dien-1-ol (8f)** Yield: 45%; Colorless oil.  $R_f$  0.19 (EtOAc: hexanes = 1:6); IR 3440(br), 3017, 2930, 2876, 2850, 1675 $\text{cm}^{-1}$ ;  $^1\text{H}$  NMR  $\delta_{\text{H}}$  6.25 (dd, 1 H,  $J = 15.2, 10.4$  Hz), 6.07 (m, 1 H), 5.70 (m, 2 H), 4.79 (t, 1 H,  $J = 3.8$  Hz), 4.46 (s, 1 H), 4.03 (m, 2 H), 2.21 (d, 1 H,  $J = 4.5$  Hz), 2.03 (m, 2 H), 1.82 (m, 2 H), 1.76 (d, 3 H,  $J = 6.7$  Hz);  $^{13}\text{C}$  NMR  $\delta_{\text{C}}$  154.03, 131.86, 130.80, 130.24, 129.57, 97.13, 73.02, 66.47, 22.33, 19.91, 18.11; HRMS calcd for  $\text{C}_{11}\text{H}_{16}\text{O}_2(\text{M})^+$  180.1150 found: 180.1149

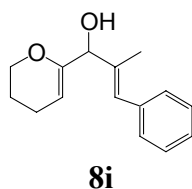

**1-(5,6-Dihydro-4H-pyran-2-yl)-2-methyl-3-phenyl-prop-2-en-1-ol (8i)** Yield: 68%; Colorless oil.  $R_f$  0.24 (EtOAc: hexanes = 1:6); IR 3429(br), 3080, 3054, 3023, 2945, 2930, 2870, 2849, 1675  $\text{cm}^{-1}$ ;  $^1\text{H}$  NMR  $\delta_{\text{H}}$  7.32 (m, 4 H), 7.21 (m, 1 H), 6.64 (s, 1 H), 4.88 (t, 1 H,  $J = 3.7$  Hz), 4.51 (d, 1 H,  $J = 4.4$  Hz), 4.03 (m, 2 H), 2.54 (d, 1 H,  $J = 5.2$  Hz), 2.06 (m, 2 H), 1.88 (d, 3 H,  $J = 1.1$  Hz), 1.82 (m, 2 H);  $^{13}\text{C}$  NMR  $\delta_{\text{C}}$  153.16, 137.69, 137.40, 129.03, 128.00, 126.33, 126.23, 97.85, 66.47, 22.34, 19.99, 14.49; HRMS calcd for  $\text{C}_{15}\text{H}_{18}\text{O}_2(\text{M})^+$  230.1307, found: 230.1310

The preparation of compounds **8p**, **8r** and **8s** followed the same general procedure. A representative procedure was demonstrated below.

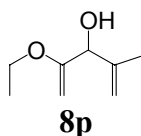

**2-Ethoxy-4-methyl-penta-1,4-dien-3-ol (8p)** To 0.500 g (6.93 mmol) of ethyl vinyl ether in 0.4 mL of THF was added 3.71 mL of a 1.7 M solution of *t*-BuLi in pentane dropwise at  $-78\text{ }^{\circ}\text{C}$ . The reaction mixture was warmed to  $0\text{ }^{\circ}\text{C}$ . After the reaction mixture was stirred for 30 min at  $0\text{ }^{\circ}\text{C}$  and treated with 0.3 mL of THF, the reaction mixture was cooled back to  $-78\text{ }^{\circ}\text{C}$  and was treated with 0.400 g (5.73 mmol) of 2-methyl-propenal dropwise. The reaction mixture was allowed to warm to  $0\text{ }^{\circ}\text{C}$ . Upon reaching  $0\text{ }^{\circ}\text{C}$ , the reaction was quenched with water (50 mL) and diluted with EtOAc (100 mL). The two layers were separated and the aqueous layer was extracted with EtOAc (2 X 40 mL). The combined organic layers were washed with brine (80 mL), dried, filtered and concentrated *in vacuo*. The product was purified by column chromatography (EtOAc: hexanes = 1:15) to afford 0.400 g (49%) of **8p** as colorless oil.  $R_f$  0.23 (EtOAc: hexanes = 1:9); IR 3436(br), 2979, 2917, 2882, 1658, 1625 $\text{cm}^{-1}$ ;  $^1\text{H}$  NMR  $\delta_{\text{H}}$  5.06 (s, 1 H), 4.92 (dd, 1 H,  $J = 2.5, 1.5\text{ Hz}$ ), 4.43 (d, 1 H,  $J = 6.0\text{ Hz}$ ), 4.16 (d, 1 H,  $J = 2.3\text{ Hz}$ ), 4.01 (d, 1 H,  $J = 2.3\text{ Hz}$ ), 3.74 (q, 2 H,  $J = 7.0\text{ Hz}$ ), 2.33 (d, 1 H,  $J = 6.2\text{ Hz}$ ) 1.71 (s, 3 H), 1.28 (t, 3 H,  $J = 7.0\text{ Hz}$ );  $^{13}\text{C}$  NMR  $\delta_{\text{C}}$  161.37, 144.71, 111.89, 82.33, 76.35, 63.09, 18.44, 14.21; HRMS calcd for  $\text{C}_8\text{H}_{14}\text{O}_2(\text{M})^+$  142.0994, found: 142.0997

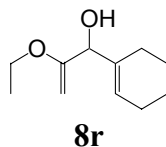

**1-Cyclohex-1-enyl-2-ethoxy-prop-2-en-1-ol (8r)** Yield: 78%; Colorless oil.  $R_f$  0.12 (EtOAc: hexanes = 1:20); IR 3410(br), 2978, 2927, 1657, 1623 $\text{cm}^{-1}$ ;  $^1\text{H}$  NMR  $\delta_{\text{H}}$  5.71 (s, 1 H), 4.33 (d, 1 H,  $J = 3.9\text{ Hz}$ ), 4.11 (d, 1 H,  $J = 2.0\text{ Hz}$ ), 3.96 (d, 1 H,  $J = 2.0\text{ Hz}$ ), 3.71 (q, 2 H,  $J = 7.0\text{ Hz}$ ), 2.36 (d, 1 H,  $J = 5.0\text{ Hz}$ ), 1.93 (m, 4 H), 1.55 (m, 4 H), 1.25 (t, 3 H,  $J = 7.0\text{ Hz}$ );  $^{13}\text{C}$  NMR  $\delta_{\text{C}}$  162.00, 137.36, 123.98, 81.77, 76.62, 62.99, 25.04, 24.26, 22.62, 22.41, 14.29; HRMS calcd for  $\text{C}_{11}\text{H}_{18}\text{O}_2(\text{M})^+$  182.1307, found: 182.1307

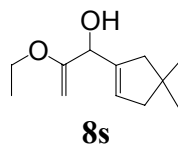

**1-(4,4-Dimethyl-cyclopent-1-enyl)-2-ethoxy-prop-2-en-1-ol (8s)** Yield: 58%; Colorless oil.  $R_f$  0.30 (EtOAc: hexanes = 1:9); IR 3441(br), 2952, 2925, 2901, 2866, 2840, 1717, 1650, 1622 $\text{cm}^{-1}$ ;  $^1\text{H}$  NMR (500 MHz,  $\text{CDCl}_3$ )  $\delta_{\text{H}}$  5.56 (s, 1 H), 4.55 (d, 1 H,  $J = 6.0\text{ Hz}$ ), 4.11 (d, 1 H,  $J = 1.8\text{ Hz}$ ), 3.97 (d, 1 H,  $J = 1.8\text{ Hz}$ ), 3.75 (q, 2 H,  $J = 7.0\text{ Hz}$ ), 2.28 (d, 1 H,  $J = 6.4\text{ Hz}$ ), 2.15 (s, 2 H), 2.10 (s, 2 H), 1.28 (t, 3 H,  $J = 7.0\text{ Hz}$ ), 1.06 (s, 6 H);  $^{13}\text{C}$  NMR (125 MHz,  $\text{CDCl}_3$ )  $\delta_{\text{C}}$  161.78, 142.74, 125.14, 81.74, 72.56, 62.97, 47.35, 46.79, 38.57, 29.63, 14.27; HRMS calcd for  $\text{C}_{12}\text{H}_{20}\text{O}_2(\text{M})^+$  196.1463, found: 196.1463

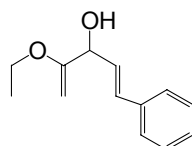

**8q**

**4-Ethoxy-1-phenyl-penta-1,4-dien-3-ol (8q)** To 0.500 g (6.93 mmol) of ethyl vinyl ether in 0.4 mL of THF was added 3.71 mL of a 1.7 M solution of *t*-BuLi in pentane dropwise at  $-78\text{ }^{\circ}\text{C}$ . The reaction mixture was warmed to  $0\text{ }^{\circ}\text{C}$ . After the reaction mixture was stirred for 30 min at  $0\text{ }^{\circ}\text{C}$ , it was treated with 0.757 g (5.73 mmol) of 3-phenylpropenal in 1 mL of THF dropwise. The reaction mixture was kept at  $0\text{ }^{\circ}\text{C}$  for 1 h before it was quenched with water (50 mL) and diluted with EtOAc (100 mL). The two layers were separated and the aqueous layer was extracted with EtOAc (2 X 40 mL). The combined organic layers were washed with brine (80 mL), dried, filtered and concentrated *in vacuo*. The product was purified by column chromatography (EtOAc: hexanes = 1:9) to afford 0.678 g (58%) of **8q** as colorless oil.  $R_f$  0.26 (EtOAc: hexanes = 1:6); IR 3368(br), 3027, 2979, 2360, 2335, 1658, 1625  $\text{cm}^{-1}$ ;  $^1\text{H}$  NMR  $\delta_{\text{H}}$  7.43 (d, 2 H,  $J = 7.6$  Hz), 7.34 (t, 2 H,  $J = 7.6$  Hz), 7.27 (d, 1 H,  $J = 7.6$  Hz), 6.70 (d, 1 H,  $J = 16.0$  Hz), 6.35 (dd, 1 H,  $J = 16.0, 6.2$  Hz), 4.74 (t, 1 H,  $J = 3.7$  Hz), 4.25 (d, 1 H,  $J = 2.1$  Hz), 4.06 (d, 1 H,  $J = 2.1$  Hz), 3.83 (q, 2 H,  $J = 7.0$  Hz), 2.42 (d, 1 H,  $J = 5.5$  Hz), 1.36 (t, 3 H,  $J = 7.0$  Hz);  $^{13}\text{C}$  NMR  $\delta_{\text{C}}$  162.32, 136.71, 131.32, 129.17, 128.54, 127.71, 126.63, 81.99, 73.64, 63.27, 14.36; HRMS calcd for  $\text{C}_{13}\text{H}_{16}\text{O}_2 (\text{M})^+$  204.1150, found: 204.1153

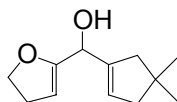

**8o**

**(4,5-Dihydro-furan-2-yl)-(4,4-dimethyl-cyclopent-1-enyl)-methanol (8o)** To 0.500 g (7.13 mmol) of dihydrofuran in 0.3 mL of THF was added 4.62 mL of a 1.7 M solution of *t*-BuLi in pentane dropwise at  $-78\text{ }^{\circ}\text{C}$ . The reaction mixture was warmed to  $0\text{ }^{\circ}\text{C}$ . After the reaction mixture was stirred for 30 min at  $0\text{ }^{\circ}\text{C}$  and treated with 0.2 mL of THF, the reaction mixture was cooled back to  $-78\text{ }^{\circ}\text{C}$  and was treated with 0.974 g (7.84 mmol) of 4,4-dimethyl-cyclopent-1-enecarbaldehyde dropwise. The reaction mixture was allowed to warm to  $0\text{ }^{\circ}\text{C}$ . Upon reaching  $0\text{ }^{\circ}\text{C}$ , the reaction was quenched with water (50 mL) and diluted with EtOAc (100 mL). The two layers were separated and the aqueous layer was extracted with EtOAc (2 X 40 mL). The combined organic layers were washed with brine (80 mL), dried, filtered and concentrated *in vacuo*. The product was purified by column chromatography (EtOAc: hexanes = 1:6) to afford 1.18 g (85%) of **8o** as colorless oil;  $R_f$  0.27 (EtOAc: hexanes = 1:6); IR 3460(br), 2951, 2929, 2892, 2865, 2840, 1714  $\text{cm}^{-1}$ ;  $^1\text{H}$  NMR (500 MHz,  $\text{CDCl}_3$ )  $\delta_{\text{H}}$  5.61 (d, 1 H,  $J = 1.2$  Hz), 4.86 (t, 1 H,  $J = 2.2$  Hz), 4.76 (d, 1 H,  $J = 5.1$  Hz), 4.36 (m, 2 H), 2.65 (m, 2 H), 2.18 (d, 2 H,  $J = 2.0$  Hz), 2.15 (d, 2 H,  $J = 2.0$  Hz), 2.02 (d, 1 H,  $J = 5.6$  Hz), 1.08 (s, 3 H), 1.08 (s, 3 H);  $^{13}\text{C}$  NMR (125 MHz,  $\text{CDCl}_3$ )  $\delta_{\text{C}}$  157.80, 141.93, 125.76, 95.95, 70.34, 67.64, 47.32, 46.77, 38.58, 29.77, 29.69, 29.67; HRMS calcd for  $\text{C}_{12}\text{H}_{18}\text{O}_2 (\text{M})^+$  194.1307, found: 194.1312



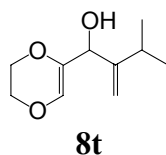

**1-(5,6-Dihydro-[1,4]dioxin-2-yl)-2-isopropyl-prop-2-en-1-ol (8t)** To 0.500 g (5.81 mmol) of 2,3-dihydro-[1,4]dioxine in 0.3 mL of THF was added 3.76 mL of a 1.7 M solution of *t*-BuLi in pentane dropwise at  $-78\text{ }^{\circ}\text{C}$ . The reaction mixture was warmed to  $0\text{ }^{\circ}\text{C}$ . After the reaction mixture was stirred for 30 min at  $0\text{ }^{\circ}\text{C}$  and treated with 0.2 mL of THF, the reaction mixture was cooled back to  $-78\text{ }^{\circ}\text{C}$  and was treated with 0.627 g (6.39 mmol) of 2-isopropyl-propenal dropwise. The reaction mixture was allowed to warm to  $0\text{ }^{\circ}\text{C}$ . Upon reaching  $0\text{ }^{\circ}\text{C}$ , the reaction was quenched with water (50 mL) and diluted with EtOAc (100 mL). The two layers were separated and the aqueous layer was extracted with EtOAc (2 X 40 mL). The combined organic layers were washed with brine (80 mL), dried, filtered and concentrated *in vacuo*. The product was purified by column chromatography (EtOAc: hexanes = 1:6) to afford 0.696 g (65%) of **8t** as colorless oil;  $R_f$  0.21 (EtOAc: hexanes = 1:4); IR 3428(br), 2961, 2931, 2874, 1680, 1649  $\text{cm}^{-1}$ ;  $^1\text{H}$  NMR (500 MHz,  $\text{CDCl}_3$ )  $\delta_{\text{H}}$  6.10 (s, 1 H), 5.21 (s, 1 H), 5.02 (s, 1 H), 4.40 (d, 1 H,  $J = 4.2\text{ Hz}$ ), 4.08 (s, 2 H), 3.98 (m, 2 H), 2.26 (m, 2 H), 1.06 (d, 3 H,  $J = 6.8\text{ Hz}$ ), 1.03 (d, 3 H,  $J = 6.8\text{ Hz}$ );  $^{13}\text{C}$  NMR (125 MHz,  $\text{CDCl}_3$ )  $\delta_{\text{C}}$  154.43, 136.88, 125.18, 108.06, 72.16, 64.62, 64.07, 30.28, 22.97, 22.01; HRMS calcd for  $\text{C}_{10}\text{H}_{16}\text{O}_3\text{ (M)}^+$  184.1100, found: 184.1102

The oxidation of compounds **8** to **9** was carried out by either Dess-Martin oxidation or  $\text{MnO}_2$ . The representative procedures of both methods were demonstrated below.

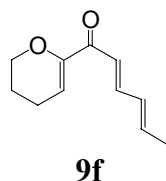

**1-(5,6-Dihydro-4H-pyran-2-yl)-hexa-2,4-dien-1-one (9f)** Oxidation by Dess-Martin reagent: To 0.250 g (1.39 mmol) of **8f** and 1 mL pyridine in 25 mL of  $\text{CH}_2\text{Cl}_2$  was added 0.718 g (1.46 mmol) of Dess-Martin reagent at  $23\text{ }^{\circ}\text{C}$ . After 20 min, the reaction was quenched with 20 mL 1:1 mixture of water and 6 N NaOH solution. The mixture was stirred vigorously for 10 min. The two layers were separated and the aqueous layer was extracted with  $\text{CH}_2\text{Cl}_2$  (2 X 15 mL). The combined organic layers were washed with brine (30 mL), dried, filtered and concentrated *in vacuo*. The product was purified by column chromatography (EtOAc: hexanes = 1:9) to afford 0.990 g (40%) of **9f** as colorless oil;

Oxidation by  $\text{MnO}_2$ : To a suspension of 7.80 g manganese (IV) oxide in 50 mL benzene was added 0.780 g (4.33 mmol) of **8f** dissolved in 50 mL benzene. After 5 min, the reaction mixture was filtered through Celite and washed with EtOAc (4 X 50 mL). The combined filtrate was concentrate *in vacuo*. The product was purified by column chromatography (EtOAc: hexanes = 1:9) to afford 0.733 g (95%) of **9f** as colorless oil  $R_f$

0.23 (EtOAc: hexanes = 1:6); IR 2991, 2950, 2934, 1671, 1620, 1580 $\text{cm}^{-1}$ ;  $^1\text{H}$  NMR  $\delta_{\text{H}}$  7.30 (m, 1 H), 6.32 (d, 1 H,  $J = 15.0$  Hz), 6.20 (m, 2 H), 5.99 (t, 1 H,  $J = 4.2$  Hz), 4.09 (t, 2 H,  $J = 5.1$  Hz), 2.21 (dd, 2 H,  $J = 10.7, 6.3$  Hz), 1.84 (m, 5 H);  $^{13}\text{C}$  NMR  $\delta_{\text{C}}$  185.78, 151.94, 144.23, 140.68, 130.65, 121.84, 110.20, 66.31, 21.58, 20.86, 18.83; HRMS calcd for  $\text{C}_{11}\text{H}_{14}\text{O}_2(\text{M})^+$  178.0994, found: 178.0998

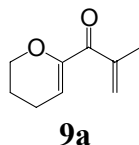

**1-(5,6-Dihydro-4H-pyran-2-yl)-2-methyl-propenone (9a)** Dess-Martin oxidation afforded **9a** as colorless oil in 85% yield.  $R_f$  0.33 (EtOAc: hexanes = 1:6); IR 2928, 2878, 1657, 1625  $\text{cm}^{-1}$ ;  $^1\text{H}$  NMR (500 Hz,  $\text{CDCl}_3$ )  $\delta_{\text{H}}$  5.84 (t, 1 H,  $J = 4.1$  Hz), 5.66 (s, 1 H), 5.64 (t, 1 H,  $J = 1.4$  Hz), 4.11 (t, 2 H,  $J = 5.1$  Hz), 2.22 (m, 2 H), 1.93 (t, 3 H,  $J = 1.1$  Hz), 1.87 (m, 2 H);  $^{13}\text{C}$  NMR (125 Hz,  $\text{CDCl}_3$ )  $\delta_{\text{C}}$  192.61, 150.89, 142.79, 123.83, 113.83, 66.28, 21.43, 20.82, 18.92; HRMS calcd for  $\text{C}_9\text{H}_{12}\text{O}_2(\text{M})^+$  152.0837, found: 152.0839

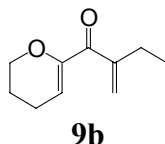

**1-(5,6-Dihydro-4H-pyran-2-yl)-2-ethyl-propenone (9b)** Dess-Martin oxidation afforded **9b** as colorless oil in 82% yield.  $R_f$  0.27 (EtOAc: hexanes = 1:6); IR 2967, 2934, 2876, 1656, 1625 $\text{cm}^{-1}$ ;  $^1\text{H}$  NMR (500 MHz,  $\text{CDCl}_3$ )  $\delta_{\text{H}}$  5.72 (t, 1 H,  $J = 4.2$  Hz), 5.43 (d, 1 H,  $J = 1.0$  Hz), 5.39 (d, 1 H,  $J = 1.0$  Hz), 3.96 (t, 2 H,  $J = 5.1$  Hz), 2.19 (m, 2 H), 2.08 (m, 2 H), 1.71 (m, 2 H), 0.87 (t, 3 H,  $J = 7.4$  Hz);  $^{13}\text{C}$  NMR (125 MHz,  $\text{CDCl}_3$ )  $\delta_{\text{C}}$  192.80, 151.08, 148.56, 120.87, 114.67, 66.18, 25.39, 21.25, 20.74, 12.02; HRMS calcd for  $\text{C}_{10}\text{H}_{14}\text{O}_2(\text{M})^+$  166.0994, found: 166.0993

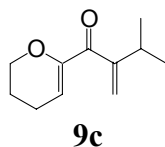

**1-(5,6-Dihydro-4H-pyran-2-yl)-2-isopropyl-propenone (9c)** Dess-Martin oxidation afforded **9c** as a colorless oil in 88% yield.  $R_f$  0.23 (EtOAc: hexanes = 1:9); IR 2961, 2932, 2873, 1660, 1625 $\text{cm}^{-1}$ ;  $^1\text{H}$  NMR  $\delta_{\text{H}}$  5.74 (t, 1 H,  $J = 4.2$  Hz), 5.33 (d, 2 H,  $J = 4.4$  Hz), 3.98 (t, 2 H,  $J = 5.1$  Hz), 2.73 (m, 1 H), 2.10 (m, 2 H), 1.74 (m, 2 H), 0.9 (d, 6 H,  $J = 7.0$  Hz);  $^{13}\text{C}$  NMR  $\delta_{\text{C}}$  193.60, 153.34, 151.51, 118.34, 115.30, 66.29, 29.92, 21.32, 21.07, 20.89; HRMS calcd for  $\text{C}_{11}\text{H}_{16}\text{O}_2(\text{M})^+$  180.1150 found: 181.1153

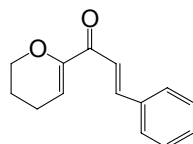

**9d**

**1-(5,6-Dihydro-4H-pyran-2-yl)-3-phenylpropenone (9d)** Oxidation by  $\text{MnO}_2$  afforded **9d** as lightly yellow oil in 80% yield.  $R_f$  0.34 (EtOAc: hexanes = 1:6); IR 3059, 3026, 2950, 2932, 2874, 1664, 1628, 1599,  $1575\text{cm}^{-1}$ ;  $^1\text{H}$  NMR  $\delta_{\text{H}}$  7.70 (d, 1 H,  $J = 5.8$  Hz), 7.54 (m, 2 H), 7.32 (m, 4 H), 6.09 (t, 1 H,  $J = 4.2$  Hz), 4.11 (t, 2 H,  $J = 5.0$  Hz), 2.21 (dd, 2 H,  $J = 10.6, 6.2$  Hz), 1.84 (m, 2 H);  $^{13}\text{C}$  NMR  $\delta_{\text{C}}$  185.28, 151.83, 143.71, 134.88, 130.32, 128.80, 128.39, 120.5, 110.88, 66.34, 21.49, 20.87; HRMS calcd for  $\text{C}_{14}\text{H}_{14}\text{O}_2$  ( $\text{M}$ ) $^+$  214.0994, found: 214.0989

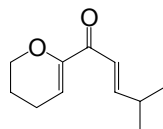

**9e**

**1-(5,6-Dihydro-4H-pyran-2-yl)-4-methylpent-2-en-1-one (9e)** Dess-Martin oxidation afforded **9e** as colorless oil in 55% yield.  $R_f$  0.28 (EtOAc: hexanes = 1:15); IR 2961, 2933, 2871, 1683, 1671, 1634,  $1614\text{cm}^{-1}$ ;  $^1\text{H}$  NMR  $\delta_{\text{H}}$  6.89 (dd, 1 H,  $J = 15.5, 6.7$  Hz), 6.53 (d, 1 H,  $J = 15.5$  Hz), 5.94 (t, 1 H,  $J = 4.2$  Hz), 4.02 (t, 2 H,  $J = 5.0$  Hz), 2.39 (m, 1 H), 2.14 (dd, 2 H,  $J = 10.8, 6.2$  Hz), 1.78 (m, 2 H), 0.98 (d, 6 H,  $J = 6.8$  Hz);  $^{13}\text{C}$  NMR  $\delta_{\text{C}}$  185.69, 154.74, 151.62, 121.0, 110.72, 66.20, 31.27, 21.43, 21.23, 20.75; HRMS calcd for  $\text{C}_{11}\text{H}_{16}\text{O}_2$  ( $\text{M}$ ) $^+$  180.1150, found: 180.1152

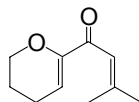

**9g**

**1-(5,6-Dihydro-4H-pyran-2-yl)-3-methylbut-2-en-1-one (9g)** Oxidation by  $\text{MnO}_2$  afforded **9g** as colorless oil in 91% yield.  $R_f$  0.34 (EtOAc: hexanes = 1:9); IR 2972, 2934, 2875, 1663, 1631,  $1611\text{cm}^{-1}$ ;  $^1\text{H}$  NMR  $\delta_{\text{H}}$  6.43 (t, 1 H,  $J = 1$  Hz), 5.88 (t, 1 H,  $J = 4.2$  Hz), 4.02 (t, 2 H,  $J = 5.1$  Hz), 2.12 (m, 2 H), 2.07 (s, 3 H), 1.85 (s, 3 H), 1.77 (m, 2 H);  $^{13}\text{C}$  NMR  $\delta_{\text{C}}$  186.56, 156.56, 152.31, 119.50, 109.23, 66.23, 27.93, 21.56, 20.99, 20.74; HRMS calcd for  $\text{C}_{10}\text{H}_{14}\text{O}_2$  ( $\text{M}$ ) $^+$  166.0994, found: 166.0989

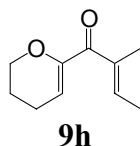

**1-(5,6-Dihydro-4H-pyran-2-yl)-2-methyl-but-2-en-1-one (9h)** Dess-Martin oxidation afforded **9h** as colorless oil in 70% yield.  $R_f$  0.26 (EtOAc: hexanes = 1:6); IR 2931, 2874, 1649  $\text{cm}^{-1}$ ;  $^1\text{H}$  NMR  $\delta_{\text{H}}$  6.40 (m, 1 H), 5.55 (t, 1 H,  $J = 4.1$  Hz), 4.00 (t, 2 H,  $J = 5.2$  Hz), 2.10 (m, 2 H), 1.77 (m, 2 H), 1.72 (m, 6 H);  $^{13}\text{C}$  NMR  $\delta_{\text{C}}$  193.07, 151.23, 137.73, 136.13, 111.86, 66.26, 21.53, 20.67, 14.37, 12.35; HRMS calcd for  $\text{C}_{10}\text{H}_{14}\text{O}_2$  ( $\text{M}$ ) $^+$  166.0994, found: 166.0993.

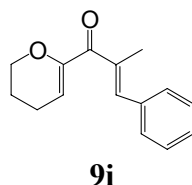

**1-(5,6-Dihydro-4H-pyran-2-yl)-2-methyl-3-phenyl-propenone (9i)** Dess-Martin oxidation afforded **9i** as colorless oil in 83% yield.  $R_f$  0.23 (EtOAc: hexanes = 1:9); IR 3055, 3024, 2954, 2929, 2873, 2841, 1654, 1626  $\text{cm}^{-1}$ ;  $^1\text{H}$  NMR  $\delta_{\text{H}}$  7.35 (m, 4 H), 7.27 (m, 1 H), 7.21 (d, 1 H,  $J = 1.3$  Hz), 5.79 (t, 1 H,  $J = 4.2$  Hz), 4.12 (t, 2 H,  $J = 5.1$  Hz), 2.21 (m, 2 H), 2.10 (d, 3 H,  $J = 1.4$  Hz), 1.87 (m, 2 H);  $^{13}\text{C}$  NMR  $\delta_{\text{C}}$  193.68, 151.18, 138.74, 135.77, 135.72, 129.54, 128.35, 128.24, 113.27, 66.37, 21.51, 20.84, 14.72; HRMS calcd for  $\text{C}_{15}\text{H}_{16}\text{O}_2$  ( $\text{M}$ ) $^+$  228.1150, found: 228.1152

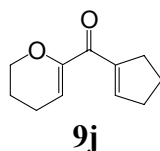

**Cyclopent-1-enyl-(5,6-dihydro-4H-pyran-2-yl)-methanone (9j)** Dess-Martin oxidation afforded **9j** as colorless oil in 60% yield.  $R_f$  0.26 (EtOAc: hexanes = 1:6); IR 2947, 2872, 1644, 1609  $\text{cm}^{-1}$ ;  $^1\text{H}$  NMR  $\delta_{\text{H}}$  6.79 (m, 1 H), 5.84 (t, 1 H,  $J = 4.2$  Hz), 4.10 (t, 2 H,  $J = 5.1$  Hz), 2.61 (m, 2 H), 2.54 (m, 2 H), 2.19 (m, 2 H), 1.86 (m, 4 H);  $^{13}\text{C}$  NMR  $\delta_{\text{C}}$  187.61, 152.02, 145.08, 142.97, 111.16, 66.24, 34.32, 32.15, 22.29, 21.58, 20.74; HRMS calcd for  $\text{C}_{11}\text{H}_{14}\text{O}_2$  ( $\text{M}$ ) $^+$  178.0994, found: 178.0993.

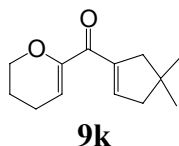

**(5,6-Dihydro-4H-pyran-2-yl)-(4,4-dimethyl-cyclopent-1-enyl)-methanone (9k)** Dess-Martin oxidation afforded **9k** as colorless oil in 65% yield.  $R_f$  0.32 (EtOAc: hexanes = 1:9); IR 2952, 2930, 2867, 2845, 1646, 1610  $\text{cm}^{-1}$ ;  $^1\text{H}$  NMR (500 MHz,  $\text{CDCl}_3$ )  $\delta_{\text{H}}$  6.68 (s, 1 H), 5.82 (t, 1 H,  $J = 4.1$  Hz), 4.09 (t, 2 H,  $J = 5.1$  Hz), 2.43 (d, 2 H,  $J = 1.9$  Hz), 2.35 (m, 2 H), 2.19 (dd, 2 H,  $J = 10.6, 6.3$  Hz), 1.85 (m, 2 H), 1.08 (s, 6 H);  $^{13}\text{C}$  NMR (125 MHz,  $\text{CDCl}_3$ )  $\delta_{\text{C}}$  187.52, 152.00, 143.79, 141.73, 110.99, 66.17, 48.99, 46.74, 37.67, 29.38, 21.55, 20.70; HRMS calcd for  $\text{C}_{13}\text{H}_{18}\text{O}_2$  ( $\text{M}$ ) $^+$  206.1307, found: 206.1309.

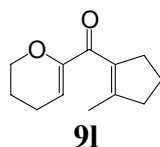

**(5,6-Dihydro-4H-pyran-2-yl)-(2-methyl-cyclopent-1-enyl)-methanone (9l)** Dess-Martin oxidation afforded **9l** as colorless oil in 57% yield.  $R_f$  0.18 (EtOAc: hexanes = 1:9); IR 2932, 2869, 2623  $\text{cm}^{-1}$ ;  $^1\text{H}$  NMR  $\delta_{\text{H}}$  5.84 (t, 1 H,  $J = 4.2$  Hz), 4.11 (t, 2 H,  $J = 5.1$  Hz), 2.67 (m, 2 H), 2.44 (dt, 2 H,  $J = 7.8, 1.0$  Hz), 2.22 (m, 2 H), 1.86 (m, 7 H);  $^{13}\text{C}$  NMR  $\delta_{\text{C}}$  191.80, 152.20, 148.85, 135.14, 112.74, 66.33, 30.96, 35.56, 22.25, 21.54, 20.90, 16.27; HRMS calcd for  $\text{C}_{12}\text{H}_{16}\text{O}_2$  ( $\text{M}$ ) $^+$  192.1150, found: 192.1148

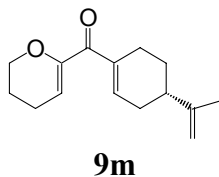

**(5,6-Dihydro-4H-pyran-2-yl)-(4-isopropenyl-cyclohex-1-enyl)-methanone (9m)** Dess-Martin oxidation afforded **9m** as colorless oil in 78% yield.  $R_f$  0.33 (EtOAc: hexanes = 1:6); IR 3079, 2915, 1642  $\text{cm}^{-1}$ ;  $^1\text{H}$  NMR  $\delta_{\text{H}}$  6.70 (m, 1 H), 5.67 (t, 1 H,  $J = 4.1$  Hz), 4.71 (m, 2 H), 4.08 (t, 2 H,  $J = 6.0$  Hz), 2.46 (m, 1 H), 2.33 (m, 1 H), 2.18 (m, 5 H), 1.85 (m, 3 H), 1.72 (s, 3 H), 1.43 (m, 1 H);  $^{13}\text{C}$  NMR  $\delta_{\text{C}}$  191.95, 151.33, 148.83, 139.67, 137.09, 111.91, 109.13, 66.27, 40.16, 31.12, 26.88, 24.59, 21.53, 20.70, 20.65; HRMS calcd for  $\text{C}_{15}\text{H}_{20}\text{O}_2$  ( $\text{M}$ ) $^+$  232.1463, found: 232.1459,  $[\alpha]_{\text{D}}^{20} -82.3$  (c 0.6,  $\text{CHCl}_3$ ).

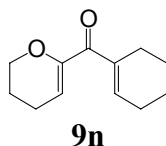

**Cyclohex-1-enyl-(5,6-dihydro-4H-pyran-2-yl)-methanone (9n)** Dess-Martin oxidation afforded **9n** as colorless oil in 70% yield.  $R_f$  0.22 (EtOAc: hexanes = 1:9); IR 2930, 2861, 1648, 1630 $\text{cm}^{-1}$ ;  $^1\text{H}$  NMR  $\delta_{\text{H}}$  6.66 (m, 1 H), 5.64 (t, 1 H,  $J = 4.1$  Hz), 4.06 (t, 2 H,  $J = 5.0$  Hz), 2.19 (m, 6 H), 1.83 (m, 2 H), 1.59 (m, 4 H);  $^{13}\text{C}$  NMR  $\delta_{\text{C}}$  192.32, 151.29, 140.36, 137.42, 111.79, 66.24, 25.75, 24.09, 21.90, 21.53, 20.67; HRMS calcd for  $\text{C}_{12}\text{H}_{16}\text{O}_2$  ( $\text{M}$ ) $^{+}$  192.1150, found: 192.1154

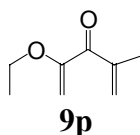

**2-Ethoxy-4-methyl-penta-1,4-dien-3-one (9p)** Dess-Martin oxidation afforded **9p** as colorless oil in 75% yield.  $R_f$  0.32 (EtOAc: hexanes = 1:30); IR 2982, 2928, 2882, 1667, 1601 $\text{cm}^{-1}$ ;  $^1\text{H}$  NMR  $\delta_{\text{H}}$  5.85 (t, 1 H,  $J = 1.0$  Hz), 5.75 (m, 1 H), 4.85 (d, 1 H,  $J = 2.6$  Hz), 4.57 (d, 1 H,  $J = 2.6$  Hz), 3.80 (q, 2 H,  $J = 7.0$  Hz), 1.91 (dd, 3 H,  $J = 1.4, 1.0$  Hz), 1.34 (t, 3 H,  $J = 7.0$  Hz);  $^{13}\text{C}$  NMR  $\delta_{\text{C}}$  191.13, 157.66, 142.71, 126.45, 93.44, 63.64, 18.36, 14.16; HRMS calcd for  $\text{C}_8\text{H}_{12}\text{O}_2$  ( $\text{M}$ ) $^{+}$  140.0837 found: 142.0840

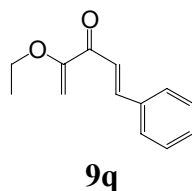

**4-Ethoxy-1-phenyl-penta-1,4-dien-3-one (9q)** Oxidation by  $\text{MnO}_2$  afforded **9q** as colorless oil in 93 % yield.  $R_f$  0.28 (EtOAc: hexanes = 1:15); IR 3080, 3060, 3028, 2981, 1930, 2901, 1736, 1678, 1594 $\text{cm}^{-1}$ ;  $^1\text{H}$  NMR  $\delta_{\text{H}}$  7.75 (d, 1 H,  $J = 5.9$  Hz), 7.58 (m, 2 H), 7.37 (m, 4 H), 5.29 (d, 1 H,  $J = 2.5$  Hz), 4.51 (d, 1 H,  $J = 2.5$  Hz), 3.84 (q, 2 H,  $J = 7.0$  Hz), 1.41 (t, 3 H,  $J = 7.0$  Hz);  $^{13}\text{C}$  NMR  $\delta_{\text{C}}$  186.40, 158.17, 144.46, 134.84, 130.49, 128.83, 128.51, 120.56, 91.68, 63.81, 14.32; HRMS calcd for  $\text{C}_{13}\text{H}_{14}\text{O}_2$  ( $\text{M}$ ) $^{+}$  202.0994, found: 202.0993

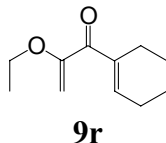

**1-Cyclohex-1-enyl-2-ethoxy-propenone (9r)** Dess-Martin oxidation afforded **9r** as colorless oil in 85% yield.  $R_f$  0.20 (EtOAc: hexanes = 1:30); IR 2980, 2932, 2992, 2868, 1657, 1632, 1607  $\text{cm}^{-1}$ ;  $^1\text{H}$  NMR  $\delta_{\text{H}}$  6.85 (m, 1 H), 4.63 (d, 1 H,  $J = 2.5$  Hz), 4.45 (d, 1 H,  $J = 2.5$  Hz), 3.77 (q, 2 H,  $J = 7.0$  Hz), 2.19 (m, 4 H), 1.59 (m, 4 H), 1.31 (t, 3 H,  $J = 7.0$  Hz);  $^{13}\text{C}$  NMR  $\delta_{\text{C}}$  192.78, 158.36, 143.34, 137.57, 91.44, 63.53, 26.07, 23.59, 21.86, 21.52, 14.24; HRMS calcd for  $\text{C}_{11}\text{H}_{16}\text{O}_2$  ( $\text{M}$ ) $^+$  180.1150, found: 180.1153. This compound is previously reported. The analysis data matches those reported.<sup>3</sup>

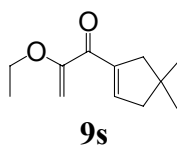

**1-(4,4-Dimethyl-cyclopent-1-enyl)-2-ethoxy-propenone (9s)** Dess-Martin oxidation afforded **9s** as colorless oil in 75% yield.  $R_f$  0.25 (EtOAc: hexanes = 1:20); IR 2979, 2954, 2930, 2868, 2848, 2831, 1655, 1601  $\text{cm}^{-1}$ ;  $^1\text{H}$  NMR  $\delta_{\text{H}}$  6.80 (s, 1 H), 4.91 (s, 1 H), 4.44 (s, 1 H), 3.79 (q, 2 H,  $J = 7.0$  Hz), 2.41 (s, 2 H), 2.34 (s, 2 H), 1.34 (t, 3 H,  $J = 7.0$  Hz) 1.06 (s, 6 H);  $^{13}\text{C}$  NMR  $\delta_{\text{C}}$  187.94, 158.87, 145.63, 141.93, 91.72, 63.64, 49.17, 46.50, 37.73, 29.43, 14.29; HRMS calcd for  $\text{C}_{12}\text{H}_{18}\text{O}_2$  ( $\text{M}$ ) $^+$  194.1307, found: 194.1308

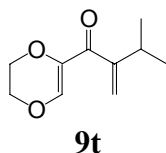

**1-(5,6-Dihydro-[1,4]dioxin-2-yl)-2-isopropyl-propenone (9t)** Dess-Martin oxidation afforded **9t** as colorless oil in 46% yield.  $R_f$  0.21 (EtOAc: hexanes = 1:4); IR 3428(br), 2960, 2930, 2875, 1649, 1607  $\text{cm}^{-1}$ ;  $^1\text{H}$  NMR (500 MHz,  $\text{CDCl}_3$ )  $\delta_{\text{H}}$  7.15 (s, 1 H), 5.36 (s, 1 H), 5.34 (s, 1 H), 4.18 (s, 4 H), 2.85 (m, 1 H), 1.04 (d, 6 H,  $J = 6.9$  Hz);  $^{13}\text{C}$  NMR (125 MHz,  $\text{CDCl}_3$ )  $\delta_{\text{C}}$  191.83, 153.33, 142.36, 137.51, 116.81, 65.14, 63.47, 30.43, 21.05; HRMS calcd for  $\text{C}_{10}\text{H}_{14}\text{O}_3$  ( $\text{M}$ ) $^+$  182.0943, found: 182.0941

The Nazarov cyclization of compounds **9** was carried out by the catalysis of 10 mol%  $\text{AlCl}_3$  in either  $\text{CH}_2\text{Cl}_2$  or MeCN. The amount of the substrates used in the cyclization was generally around 90-120 mg. The representative procedure was demonstrated below.

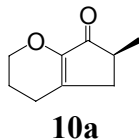

**6-Methyl-3,4,5,6-tetrahydro-2H-cyclopenta[b]pyran-7-one (10a)** To 0.011 g (0.079 mmol) of  $\text{AlCl}_3$  in 2 mL  $\text{CH}_2\text{Cl}_2$  was added 0.120 g (0.788 mmol) of **9a** in 2 mL  $\text{CH}_2\text{Cl}_2$ . The reaction mixture was stirred for 1 min before it was quenched with water (4 mL). The mixture was further diluted with 10 mL  $\text{CH}_2\text{Cl}_2$ . The two layers were separated and the aqueous layer was extracted with  $\text{CH}_2\text{Cl}_2$  (2 X 5 mL). The combined organic layers were washed with brine (10 mL), dried, filtered and concentrated *in vacuo*. The product was purified by column chromatography (EtOAc: hexanes = 1:4) to afford 0.110 g (92%) **10a** as colorless oil.  $R_f$  0.14 (EtOAc: hexanes = 1:4); IR 2962, 2928, 2872, 1707, 1648  $\text{cm}^{-1}$ ;  $^1\text{H}$  NMR (500 Hz,  $\text{CDCl}_3$ )  $\delta_{\text{H}}$  4.10 (m, 2 H), 2.69 (m, 1 H), 2.38 (m, 1 H), 2.32 (t, 2 H,  $J = 6.2$  Hz), 2.03 (dd, 1 H,  $J = 7.4, 1.8$  Hz), 1.95 (m, 2 H), 1.18 (d, 3 H,  $J = 7.4$  Hz);  $^{13}\text{C}$  NMR (125 Hz,  $\text{CDCl}_3$ )  $\delta_{\text{C}}$  203.44, 150.13, 143.82, 66.71, 37.95, 34.80, 23.98, 21.57, 16.45; HRMS calcd for  $\text{C}_9\text{H}_{12}\text{O}_2$  ( $\text{M}$ ) $^+$  152.0837, found: 152.0838

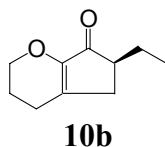

**6-Ethyl-3,4,5,6-tetrahydro-2H-cyclopenta[b]pyran-7-one (10b)** Cyclization of **9b** in  $\text{CH}_2\text{Cl}_2$  afforded **10b** as colorless oil in 91% yield. Reaction time: 1 min;  $R_f$  0.20 (EtOAc: hexanes = 1:4); IR 2961, 2929, 2875, 1706, 1650  $\text{cm}^{-1}$ ;  $^1\text{H}$  NMR (500 MHz,  $\text{CDCl}_3$ )  $\delta_{\text{H}}$  4.03 (m, 2 H), 2.55 (m, 1 H), 2.28 (t, 2 H,  $J = 6.2$  Hz), 2.21 (m, 1 H), 2.06 (dd, 1 H,  $J = 17.5, 1.8$  Hz), 1.91 (m, 2 H), 1.77 (m, 1 H), 1.34 (m, 1 H), 0.87 (t, 3 H,  $J = 7.4$  Hz);  $^{13}\text{C}$  NMR (125 MHz,  $\text{CDCl}_3$ )  $\delta_{\text{C}}$  202.84, 150.57, 144.38, 66.69, 44.66, 32.14, 24.31, 23.97, 21.54, 11.09; HRMS calcd for  $\text{C}_{10}\text{H}_{14}\text{O}_2$  ( $\text{M}$ ) $^+$  166.0994, found: 166.0997

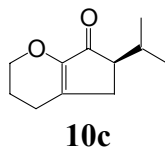

**6-Isopropyl-3,4,5,6-tetrahydro-2H-cyclopenta[b]pyran-7-one (10c)** Cyclization of **9c** in  $\text{CH}_2\text{Cl}_2$  afforded **10c** as colorless oil in 93% yield. Reaction time: 1 min;  $R_f$  0.22 (EtOAc: hexanes = 1:4); IR 2956, 2930, 2872, 1706, 1650  $\text{cm}^{-1}$ ;  $^1\text{H}$  NMR  $\delta_{\text{H}}$  4.03 (m, 2 H), 2.37 (m, 1 H), 2.29 (m, 3 H), 2.17 (m, 2 H), 1.89 (m, 2 H), 0.92 (d, 3 H,  $J = 7.0$  Hz), 0.71 (d, 3 H,  $J = 6.8$  Hz);  $^{13}\text{C}$  NMR  $\delta_{\text{C}}$  202.59, 151.27, 144.74, 66.75, 49.10, 28.55, 28.12, 24.02, 21.63, 20.39, 16.95; HRMS calcd for  $\text{C}_{11}\text{H}_{16}\text{O}_2$  ( $\text{M}$ ) $^+$  180.1150 found: 181.1151



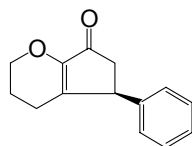

**10d**

**5-Phenyl-3,4,5,6-tetrahydro-2H-cyclopenta[b]pyran-7-one (10d)** Cyclization of **9d** in MeCN afforded **10d** as colorless oil in 86% yield. Reaction time: 10 min;  $R_f$  0.26 (EtOAc: hexanes = 1:3); IR 2928, 1710, 1648 $\text{cm}^{-1}$ ;  $^1\text{H}$  NMR  $\delta_{\text{H}}$  7.33 (m, 2 H), 7.26 (m, 1 H), 7.14 (m, 2 H), 4.15 (m, 2 H), 3.85 (dd, 1 H,  $J = 6.6, 1.6$  Hz), 2.91 (dd, 1 H,  $J = 19.0, 6.6$  Hz), 2.32 (dt, 1 H,  $J = 19.0, 0.9$  Hz), 2.12 (tq, 2 H,  $J = 19.0, 6.2$  Hz), 1.92 (m, 2 H);  $^{13}\text{C}$  NMR  $\delta_{\text{C}}$  200.08, 151.50, 147.39, 141.72, 129.00, 127.17, 127.10, 66.94, 43.66, 42.94, 22.20, 21.46; HRMS calcd for  $\text{C}_{14}\text{H}_{14}\text{O}_2$  ( $\text{M}$ ) $^{+}$  214.0994, found: 214.0998

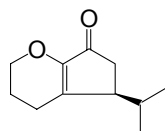

**10e**

**5-Isopropyl-3,4,5,6-tetrahydro-2H-cyclopenta[b]pyran-7-one (10e)** Cyclization of **9e** in MeCN afforded **10e** as colorless oil in 92% yield. Reaction time: 50 min;  $R_f$  0.13 (EtOAc: hexanes = 1:6); IR 2955, 2930, 2872, 1709, 1645 $\text{cm}^{-1}$ ;  $^1\text{H}$  NMR (500 MHz,  $\text{CDCl}_3$ )  $\delta_{\text{H}}$  4.13 (m, 1 H), 4.00 (m, 1 H), 2.69 (s, 1 H), 2.33 (dd, 1 H,  $J = 18.6, 6.8$  Hz), 2.22 (m, 2 H), 2.03 (m, 2 H), 1.90 (m, 2 H), 0.93 (d, 3 H,  $J = 6.8$  Hz), 0.66 (d, 3 H,  $J = 6.8$  Hz);  $^{13}\text{C}$  NMR (125 MHz,  $\text{CDCl}_3$ )  $\delta_{\text{C}}$  200.40, 151.34, 147.65, 66.74, 43.06, 33.96, 28.03, 22.61, 21.44, 20.66, 15.52; HRMS calcd for  $\text{C}_{11}\text{H}_{16}\text{O}_2$  ( $\text{M}$ ) $^{+}$  180.1150, found: 180.1151

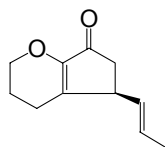

**10f**

**5-Propenyl-3,4,5,6-tetrahydro-2H-cyclopenta[b]pyran-7-one (10f)** Cyclization of **9f** in MeCN afforded **10f** as colorless oil in 90% yield. Reaction time: 30 min;  $R_f$  0.20 (EtOAc: hexanes = 1:4); IR 2933, 1710, 1645 $\text{cm}^{-1}$ ;  $^1\text{H}$  NMR  $\delta_{\text{H}}$  5.58 (m, 1 H), 5.14 (m, 1 H), 4.07 (m, 2 H), 3.20 (t, 1 H,  $J = 7.4$  Hz), 2.62 (dd, 1 H,  $J = 18.8, 6.3$  Hz), 2.34 (dt, 1 H,  $J = 18.8, 6.3$  Hz), 2.14 (m, 2 H), 1.91 (m, 2 H), 1.67 (m, 3 H);  $^{13}\text{C}$  NMR  $\delta_{\text{C}}$  199.87, 150.79, 147.39, 131.41, 127.59, 66.78, 41.11, 40.21, 22.19, 21.42, 17.72; HRMS calcd for  $\text{C}_{11}\text{H}_{14}\text{O}_2$  ( $\text{M}$ ) $^{+}$  178.0994, found: 178.0996

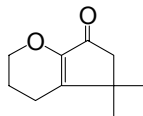

**10g**

**5,5-Dimethyl-3,4,5,6-tetrahydro-2H-cyclopenta[b]pyran-7-one (10g)** Cyclization of **9g** in MeCN afforded **10g** as colorless oil in 85% yield. Reaction time: 12 h;  $R_f$  0.15 (EtOAc: hexanes = 1:4); IR 2957, 2928, 2869, 1710, 1645  $\text{cm}^{-1}$ ;  $^1\text{H}$  NMR (500 Hz,  $\text{CDCl}_3$ )  $\delta_{\text{H}}$  4.07 (t, 2 H,  $J = 5.2$  Hz), 2.28 (t, 2 H,  $J = 6.2$  Hz), 2.25 (s, 2 H), 1.94 (m, 2 H), 1.18 (s, 6 H);  $^{13}\text{C}$  NMR (125 Hz,  $\text{CDCl}_3$ )  $\delta_{\text{C}}$  199.59, 152.70, 148.93, 66.50, 49.17, 36.78, 27.18, 21.41, 18.91; HRMS calcd for  $\text{C}_{10}\text{H}_{14}\text{O}_2$  ( $\text{M}$ ) $^{+}$  166.0994, found: 166.0989

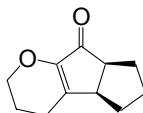

**10j**

**2,3,3a,5,6,8a-Hexahydro-1H,4H-7-oxa-cyclopenta[α]inden-8-one (10j)** Cyclization of **9j** in  $\text{CH}_2\text{Cl}_2$  afforded **10j** as colorless oil in 88% yield. Reaction time: 40 min;  $R_f$  0.19 (EtOAc: hexanes = 1:4); IR 2945, 2867, 1706, 1644  $\text{cm}^{-1}$ ;  $^1\text{H}$  NMR (300 MHz,  $\text{CDCl}_3$ )  $\delta_{\text{H}}$  4.01, (m, 2 H), 3.01 (m, 1 H), 2.65 (m, 1 H), 2.32 (m, 1 H), 2.20 (m, 1 H), 1.89 (m, 2 H), 1.79 (m, 1 H), 1.55 (m, 4 H), 1.20 (m, 1 H);  $^{13}\text{C}$  NMR (75 MHz,  $\text{CDCl}_3$ )  $\delta_{\text{C}}$  203.78, 151.41, 147.70, 67.03, 48.74, 43.21, 28.93, 28.18, 24.03, 22.67, 21.84; HRMS calcd for  $\text{C}_{11}\text{H}_{14}\text{O}_2$  ( $\text{M}$ ) $^{+}$  178.0994, found: 178.0987.

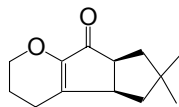

**10k**

**2,2-Dimethyl-2,3,3a,5,6,8a-hexahydro-1H,4H-7-oxa-cyclopenta[α]inden-8-one (10k)** Cyclization of **9k** in  $\text{CH}_2\text{Cl}_2$  afforded **10k** as colorless oil in 92% yield. Reaction time: 30 min;  $R_f$  0.29 (EtOAc: hexanes = 1:3); IR 2950, 2864, 1708, 1644  $\text{cm}^{-1}$ ;  $^1\text{H}$  NMR  $\delta_{\text{H}}$  4.03 (m, 2 H), 3.13 (q, 1 H,  $J = 7.5$  Hz), 2.87 (dd, 1 H,  $J = 16.6, 7.1$  Hz), 2.24 (m, 2 H), 1.91 (m, 2 H), 1.73 (m, 2 H), 1.37 (dd, 1 H,  $J = 12.9, 7.6$  Hz), 1.11 (dd, 1 H,  $J = 12.6, 7.4$  Hz), 0.95 (d, 6 H,  $J = 4.7$  Hz);  $^{13}\text{C}$  NMR  $\delta_{\text{C}}$  203.45, 148.63, 148.44, 66.64, 48.89, 43.47, 43.43, 43.27, 41.23, 28.65, 27.81, 22.62, 21.55; HRMS calcd for  $\text{C}_{13}\text{H}_{18}\text{O}_2$  ( $\text{M}$ ) $^{+}$  206.1302, found: 206.1309.

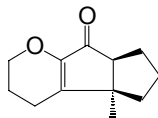

**10l**

**3a-Methyl-2,3,3a,5,6,8a-hexahydro-1H,4H-7-oxa-cyclopenta[a]inden-8-one (10l)**

Cyclization of **9l** in CH<sub>2</sub>Cl<sub>2</sub> afforded **10l** as colorless oil in 91% yield. Reaction time: 12 h; R<sub>f</sub> 0.27 (EtOAc: hexanes = 1:4); IR 2948, 2866, 1706, 1644 cm<sup>-1</sup>; <sup>1</sup>H NMR δ<sub>H</sub> 4.05 (m, 2 H), 2.28 (m, 3 H), 1.93 (m, 2 H), 1.75 (m, 3 H), 1.59 (m, 1 H), 1.25 (m, 5 H); <sup>13</sup>C NMR δ<sub>C</sub> 202.95, 150.60, 150.03, 66.66, 56.27, 48.55, 35.68, 28.89, 25.01, 24.73, 21.57, 19.56; HRMS calcd for C<sub>12</sub>H<sub>16</sub>O<sub>2</sub> (M)<sup>+</sup> 192.1150, found: 192.1155

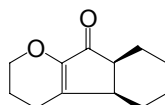

**10n**

**3,4,4b,5,6,7,8,8a-Octahydro-2H-1-oxa-fluoren-9-one (G-037)** Cyclization of **9n** in CH<sub>2</sub>Cl<sub>2</sub> afforded **10n** as colorless oil in 88% yield. Reaction time: 20 min; Colorless oil. R<sub>f</sub> 0.28 (EtOAc: hexanes = 1:4); IR 2931, 2863, 1707, 1644 cm<sup>-1</sup>; <sup>1</sup>H NMR (500 MHz, CDCl<sub>3</sub>) δ<sub>H</sub> 4.09 (m, 1 H), 4.01 (m, 1 H), 2.69 (q, 1 H, *J* = 6.9 Hz), 2.35 (m, 2 H), 2.20 (dt, 1 H, *J* = 18.7, 5.8 Hz), 1.91 (m, 3 H), 1.79 (m, 1 H), 1.67 (m, 1 H), 1.46 (m, 2 H), 1.32 (m, 2 H), 1.15 (m, 1 H); <sup>13</sup>C NMR (125 MHz, CDCl<sub>3</sub>) δ<sub>C</sub> 202.74, 150.20, 148.31, 66.78, 43.64, 37.45, 26.60, 22.38, 21.91, 21.57, 20.44, 20.29; HRMS calcd for C<sub>12</sub>H<sub>16</sub>O<sub>2</sub> (M)<sup>+</sup> 192.1150, found: 192.1150

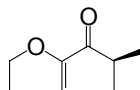

**10p**

**2-Ethoxy-5-methyl-cyclopent-2-enone (10p)** Cyclization of **9p** in CH<sub>2</sub>Cl<sub>2</sub> afforded **10p** as colorless oil in 80% yield. Reaction time: 6 h; R<sub>f</sub> 0.23 (EtOAc: hexanes = 1:6); IR 2978, 2929, 1712, 1623 cm<sup>-1</sup>; <sup>1</sup>H NMR (500 MHz, CDCl<sub>3</sub>) δ<sub>H</sub> 6.28 (t, 1 H, *J* = 3.0 Hz), 3.90 (dq, 2 H, *J* = 7.0, 2.5 Hz), 4.85 (dq, 1 H, *J* = 17.6, 3.2 Hz), 2.39 (m, 1 H), 2.07 (dt, 1 H, *J* = 17.6, 2.5 Hz), 1.38 (t, 3 H, *J* = 7.0 Hz), 1.18 (d, 3 H, *J* = 7.5 Hz); <sup>13</sup>C NMR (125 MHz, CDCl<sub>3</sub>) δ<sub>C</sub> 205.46, 155.55, 125.66, 65.35, 38.49, 31.17, 16.42, 14.31; HRMS calcd for C<sub>8</sub>H<sub>12</sub>O<sub>2</sub> (M)<sup>+</sup> 140.0837 found: 142.0840; This compound is previously reported. The analysis data matches those reported.<sup>4</sup>

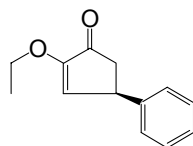

**10q**

**2-Ethoxy-4-phenyl-cyclopent-2-enone (10q)** Cyclization of **9q** in MeCN afforded **10q** as colorless oil in 40% yield. Reaction time: 30 h;  $R_f$  0.20 (EtOAc: hexanes = 1:6); IR 3063, 3027, 2980, 2930, 2897, 1713, 1621, 1604  $\text{cm}^{-1}$ ;  $^1\text{H}$  NMR (500 MHz,  $\text{CDCl}_3$ )  $\delta_{\text{H}}$  7.34 (t, 2 H,  $J = 7.2$  Hz), 7.26 (m, 1 H), 7.18 (d, 2 H,  $J = 7.2$  Hz), 6.37 (d, 1 H,  $J = 3.0$  Hz), 3.99 (m, 3 H), 2.96 (dd, 1 H,  $J = 19.3, 6.7$  Hz), 2.35 (dd, 1 H,  $J = 19.3, 2.1$  Hz), 1.43 (t, 3 H,  $J = 7.0$  Hz);  $^{13}\text{C}$  NMR (125 MHz,  $\text{CDCl}_3$ )  $\delta_{\text{C}}$  202.30, 156.41, 143.03, 130.11, 128.86, 127.07, 126.89, 65.80, 43.08, 39.98, 14.31; HRMS calcd for  $\text{C}_{13}\text{H}_{14}\text{O}_2$  ( $\text{M}$ ) $^{+}$  202.0994, found: 202.0997

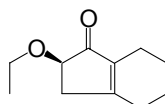

**10r**

**2-Ethoxy-2,3,4,5,6,7-hexahydro-inden-1-one (10r)** Cyclization of **9r** in MeCN afforded **10r** as colorless oil in 91% yield. Reaction time: 6 h;  $R_f$  0.31 (EtOAc: hexanes = 1:6); IR 2973, 2930, 2864, 1707, 1644  $\text{cm}^{-1}$ ;  $^1\text{H}$  NMR (500 MHz,  $\text{CDCl}_3$ )  $\delta_{\text{H}}$  3.96 (dd, 1 H,  $J = 6.3, 2.3$  Hz), 3.88 (m, 1 H), 3.63 (m, 1 H), 2.79 (dd, 1 H,  $J = 7.6, 5.2$  Hz), 2.39 (d, 1 H,  $J = 7.6$  Hz), 2.24 (m, 2 H), 2.12 (m, 2 H), 1.73 (m, 2 H), 1.63 (m, 2 H), 1.24 (t, 3 H,  $J = 7.0$  Hz);  $^{13}\text{C}$  NMR (125 MHz,  $\text{CDCl}_3$ )  $\delta_{\text{C}}$  205.70, 170.73, 137.12, 77.54, 65.79, 37.56, 28.46, 21.94, 21.49, 19.79, 15.28; HRMS calcd for  $\text{C}_{11}\text{H}_{16}\text{O}_2$  ( $\text{M}$ ) $^{+}$  180.1150, found: 180.1148

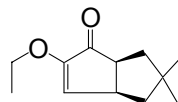

**10s**

**2-Ethoxy-5,5-dimethyl-4,5,6,6a-tetrahydro-3aH-pentalen-1-one (10s)** Cyclization of **9s** in refluxing MeCN afforded **10s** as colorless oil in 75% yield. Reaction time: 3 h;  $R_f$  0.20 (EtOAc: hexanes = 1:9); IR 2952, 2933, 2902, 2864, 1711, 1618  $\text{cm}^{-1}$ ;  $^1\text{H}$  NMR  $\delta_{\text{H}}$  6.28 (d, 1 H,  $J = 3.2$  Hz), 3.86 (q, 2 H,  $J = 7.0$  Hz), 3.25 (m, 1 H), 2.91 (m, 1 H), 1.76 (m, 2 H), 1.43 (dd, 1 H,  $J = 12.9, 7.7$  Hz), 1.35 (t, 3 H,  $J = 7.0$  Hz), 1.13 (dd, 1 H,  $J = 12.6, 7.4$  Hz), 0.95 (d, 6 H,  $J = 3.6$  Hz);  $^{13}\text{C}$  NMR  $\delta_{\text{C}}$  205.65, 154.16, 130.92, 65.35, 49.16, 45.09, 43.64, 41.87, 40.34, 28.72, 27.90, 14.30; HRMS calcd for  $\text{C}_{12}\text{H}_{18}\text{O}_2$  ( $\text{M}$ ) $^{+}$  194.1307, found: 194.1311

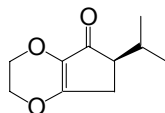

## 10t

**6-Isopropyl-2,3,6,7-tetrahydro-cyclopenta[1,4]dioxin-5-one (10t)** Cyclization of **9t** in CH<sub>2</sub>Cl<sub>2</sub> afforded **10t** as colorless oil in 75% yield. Reaction time: 2 min; *R<sub>f</sub>* 0.22 (EtOAc: hexanes = 1:2); IR 2957, 2930, 2873, 1707, 1641 cm<sup>-1</sup>; <sup>1</sup>H NMR δ<sub>H</sub> 4.30 (m, 2 H), 4.12 (t, 2 H, *J* = 4.0 Hz), 2.48 (dd, 1 H, *J* = 17.0, 6.6 Hz), 2.40 (m, 1H), 2.28 (m, 2 H), 0.95 (d, 3 H, *J* = 7.0 Hz), 0.76 (d, 3 H, *J* = 6.8 Hz); <sup>13</sup>C NMR δ<sub>C</sub> 196.92, 165.08, 134.31, 66.88, 63.84, 47.66, 28.06, 24.78, 20.40, 16.54; HRMS calcd for C<sub>10</sub>H<sub>14</sub>O<sub>3</sub> (M)<sup>+</sup> 182.0943, found: 182.0944

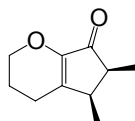

**11a**

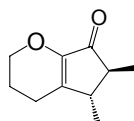

**11b**

Cyclization of **9h** in CH<sub>2</sub>Cl<sub>2</sub> afforded **11a** and **11b** as colorless oil in 89% combined yield with a ratio of 3:2. Reaction time: 5 min; **11a** and **11b** were separated by HPLC.

**Cis-5,6-Dimethyl-3,4,5,6-tetrahydro-2H-cyclopenta[b]pyran-7-one (11a)** *R<sub>f</sub>* 0.20 (EtOAc: hexanes = 1:4); Retention time: 28.3 min, IR 2967, 1705, 1647 cm<sup>-1</sup>; <sup>1</sup>H NMR δ<sub>H</sub> 4.13, (m, 1 H), 4.01 (m, 1 H), 2.80 (m, 1 H), 2.48 (m, 1 H), 2.40 (m, 1 H), 2.20 (m, 1 H), 1.94 (m, 2 H), 1.08 (d, 3 H, *J* = 7.6 Hz), 1.03 (d, 3 H, *J* = 7.2 Hz); <sup>13</sup>C NMR δ<sub>C</sub> 203.27, 149.70, 148.69, 66.81, 42.13, 36.06, 21.97, 21.66, 14.79, 11.22; HRMS calcd for C<sub>10</sub>H<sub>14</sub>O<sub>2</sub> (M)<sup>+</sup> 166.0994, found: 166.0994.

**Trans-5,6-Dimethyl-3,4,5,6-tetrahydro-2H-cyclopenta[b]pyran-7-one (11b)** *R<sub>f</sub>* 0.20 (EtOAc: hexanes = 1:4); Retention time: 26.5 min, IR 2927, 1707, 1644 cm<sup>-1</sup>; <sup>1</sup>H NMR δ<sub>H</sub> 4.09, (m, 2 H), 2.40 (m, 1 H), 2.25 (m, 1 H), 2.18 (m, 1 H), 1.95 (m, 2 H), 1.22 (m, 1 H), 1.17 (d, 3 H, *J* = 7.4 Hz), 1.16 (d, 3 H, *J* = 7.1 Hz); <sup>13</sup>C NMR δ<sub>C</sub> 202.63, 149.56, 147.43, 70.90, 66.64, 47.34, 41.31, 21.60, 17.84, 14.71; HRMS calcd for C<sub>10</sub>H<sub>14</sub>O<sub>2</sub> (M)<sup>+</sup> 166.0994, found: 166.0996.

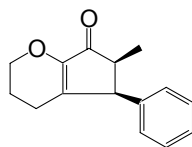

**12**

**6-Methyl-5-phenyl-3,4,5,6-tetrahydro-2H-cyclopenta[b]pyran-7-one (12)** Cyclization of **9i** in CH<sub>2</sub>Cl<sub>2</sub> afforded **12** as white solid in 88% yield. Reaction time: 5 min; *R<sub>f</sub>* 0.22 (EtOAc: hexanes = 1:4); IR 3026, 2972, 2932, 2876, 1710, 1650 cm<sup>-1</sup>; <sup>1</sup>H NMR δ<sub>H</sub> 7.24 (m, 3 H), 7.00 (d, 2 H, *J* = 7.1 Hz), 4.16 (m, 2 H), 3.99 (d, 1 H, *J* = 6.6 Hz), 2.73 (m, 1 H), 2.16 (t, 2 H, *J* = 6.2 Hz), 1.93 (m, 2 H), 0.65 (d, 3 H, *J* = 7.6 Hz); <sup>13</sup>C NMR δ<sub>C</sub> 202.97, 151.51, 144.91, 138.55, 128.81, 128.44, 127.08, 67.05, 48.78, 43.22, 22.46, 21.60, 12.27; HRMS calcd for C<sub>15</sub>H<sub>16</sub>O<sub>2</sub> (M)<sup>+</sup> 228.1150, found: 228.1148; m.p. 93.8-94.8 °C

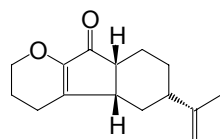

**13a**

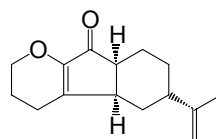

**13b**

Cyclization of **9m** in CH<sub>2</sub>Cl<sub>2</sub> afforded **13a** and **13b** as colorless oil in 85% combined yield with 60% d.r.. Reaction time: 15 min; **13a** and **13b** were separated by HPLC.

**6-Isopropenyl-3,4,4b,5,6,7,8,8a-octahydro-2H-1-oxa-fluoren-9-one (Major)** *R<sub>f</sub>* 0.21 (EtOAc: hexanes = 1:4); Retention time: 26.2 min; IR 2931, 2865, 1704, 1643cm<sup>-1</sup>; <sup>1</sup>H NMR δ<sub>H</sub> 4.65 (m, 2 H), 4.10 (m, 2 H), 2.96 (m, 1 H), 2.45 (q, 1 H, *J* = 6.2 Hz), 2.34 (dt, 1 H, *J* = 18.8, 6.6 Hz), 2.21 (dt, 1 H, *J* = 18.8, 5.8 Hz), 1.94 (m, 3 H), 1.77 (m, 8 H), 1.25 (m, 1 H); <sup>13</sup>C NMR δ<sub>C</sub> 203.30, 150.83, 149.75, 146.87, 108.56, 66.81, 43.00, 36.86, 36.65, 28.20, 25.68, 22.89, 21.84, 21.55, 20.62; HRMS calcd for C<sub>15</sub>H<sub>20</sub>O<sub>2</sub> (M)<sup>+</sup> 232.1463, found: 232.1462, [α]<sub>D</sub><sup>20</sup> 72.2 (c 0.9, CHCl<sub>3</sub>).

**6-Isopropenyl-3,4,4b,5,6,7,8,8a-octahydro-2H-1-oxa-fluoren-9-one (Minor)** *R<sub>f</sub>* 0.21 (EtOAc: hexanes = 1:4); Retention time: 23.1 min; IR 2924, 2857, 1706, 1634cm<sup>-1</sup>; <sup>1</sup>H NMR δ<sub>H</sub> 4.64 (m, 2 H), 4.13 (m, 1 H), 4.03 (m, 1 H), 2.75 (m, 1 H), 2.39 (m, 2 H), 2.25 (dt, 1 H, *J* = 18.8, 5.7 Hz), 1.98 (m, 5 H), 1.69 (m, 5 H), 1.14 (m, 1 H), 0.87 (m, 1 H); <sup>13</sup>C NMR δ<sub>C</sub> 201.81, 149.88, 149.61, 148.39, 108.64, 66.85, 43.7, 42.14, 38.44, 35.35, 27.89, 22.58, 22.01, 21.67, 20.46; HRMS calcd for C<sub>15</sub>H<sub>20</sub>O<sub>2</sub> (M)<sup>+</sup> 232.1463, found: 232.1466, [α]<sub>D</sub><sup>20</sup> -48.3 (c 0.4, CHCl<sub>3</sub>).

<sup>1</sup> Still, W. C.; Kahn, M.; Mitra, A. *J. Org. Chem.* **1978**, *43*, 2923-2925.

<sup>2</sup> Alaimo, P. J.; Peters, D. W.; Arnold, J.; Bergman, R. G. *J. Chem. Ed.* **2001**, *78*, 64.

<sup>3</sup> Stille, J. K.; Kwon, H. B.; McKee, B. H.; *J. Org. Chem.* **1990**, *55*, 3114-3118

<sup>4</sup> Katritzky, A. R.; Zhang, G.; Jiang, J.; *J. Org. Chem.* **1995**, *60*, 7605-7611

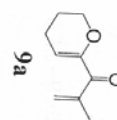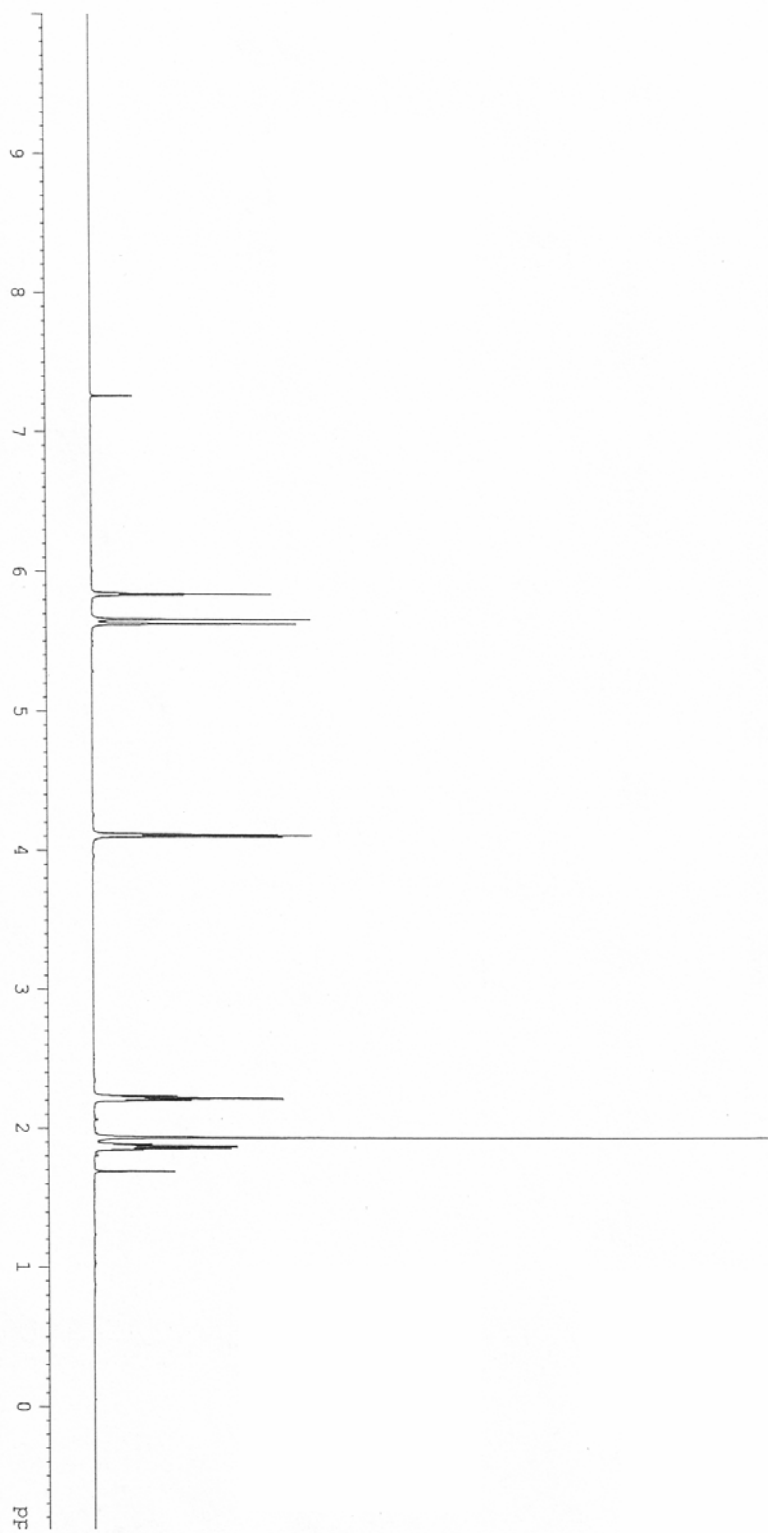

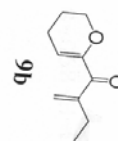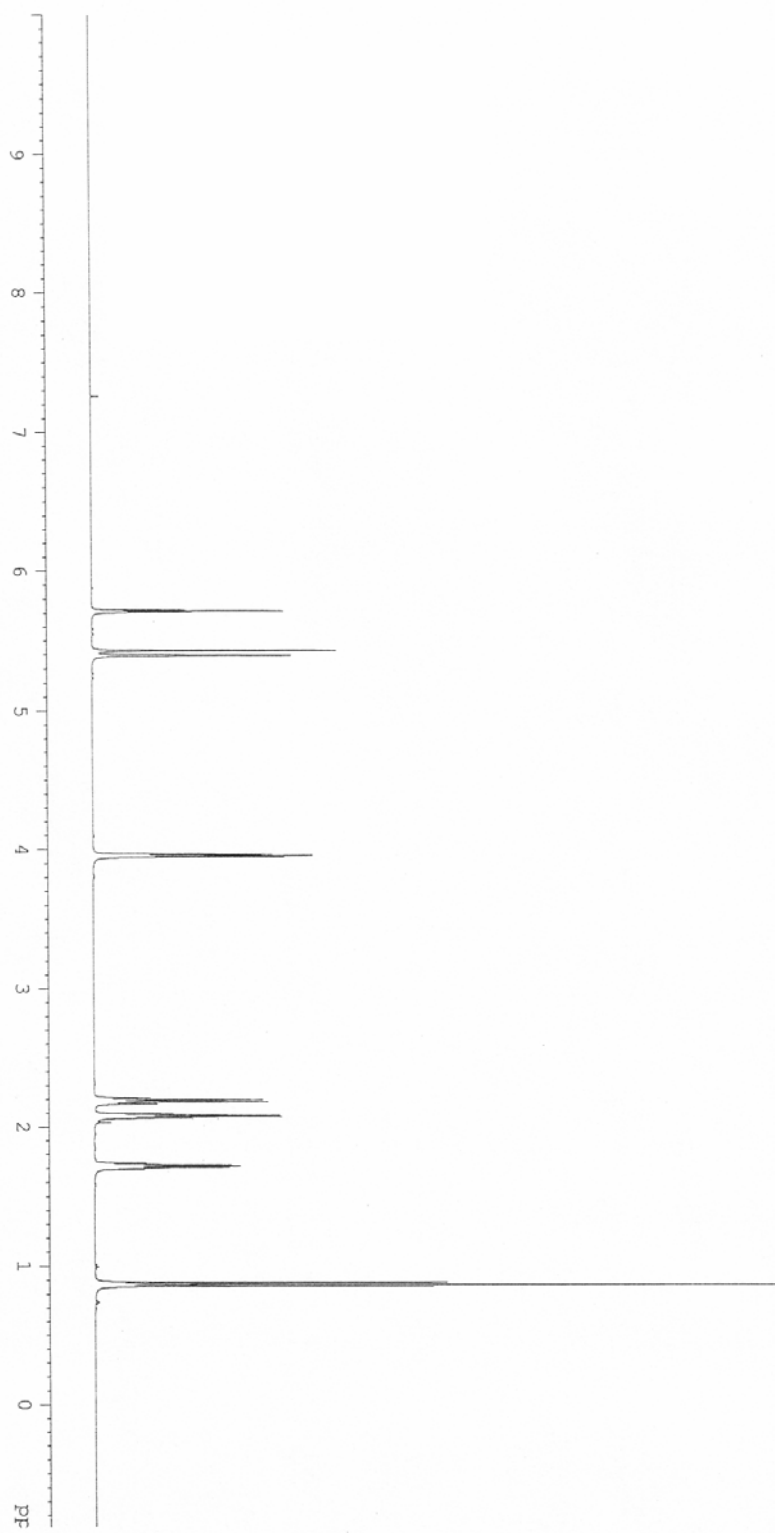



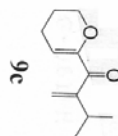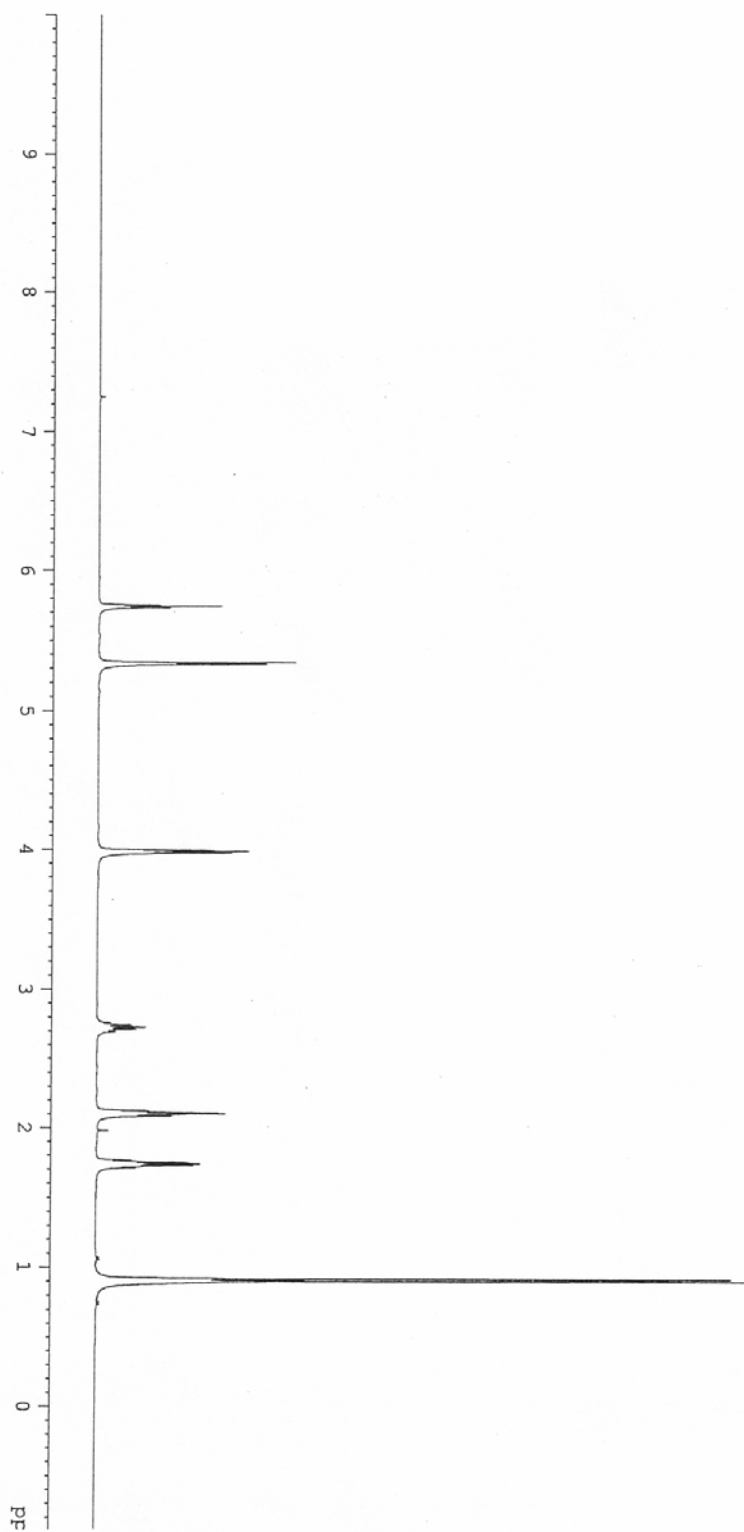

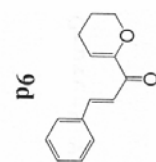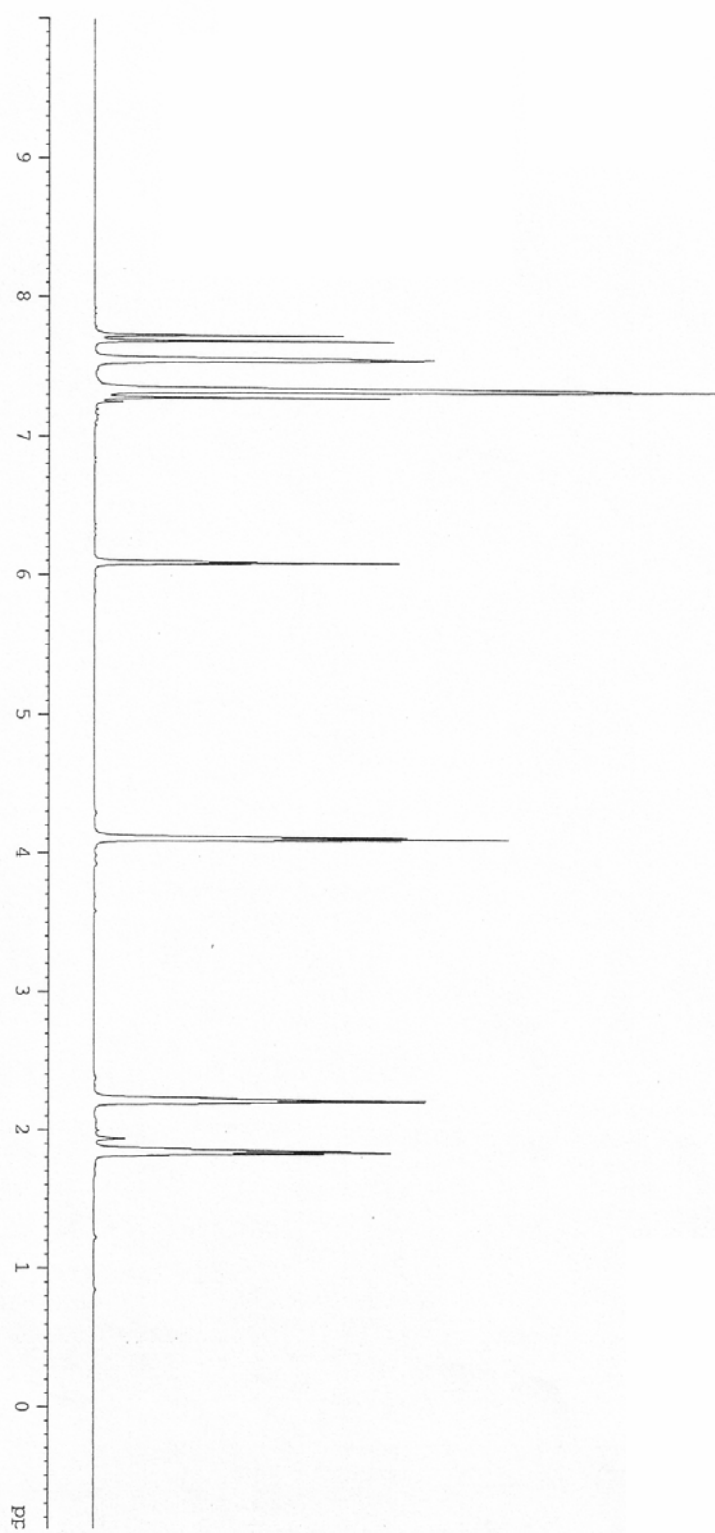

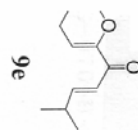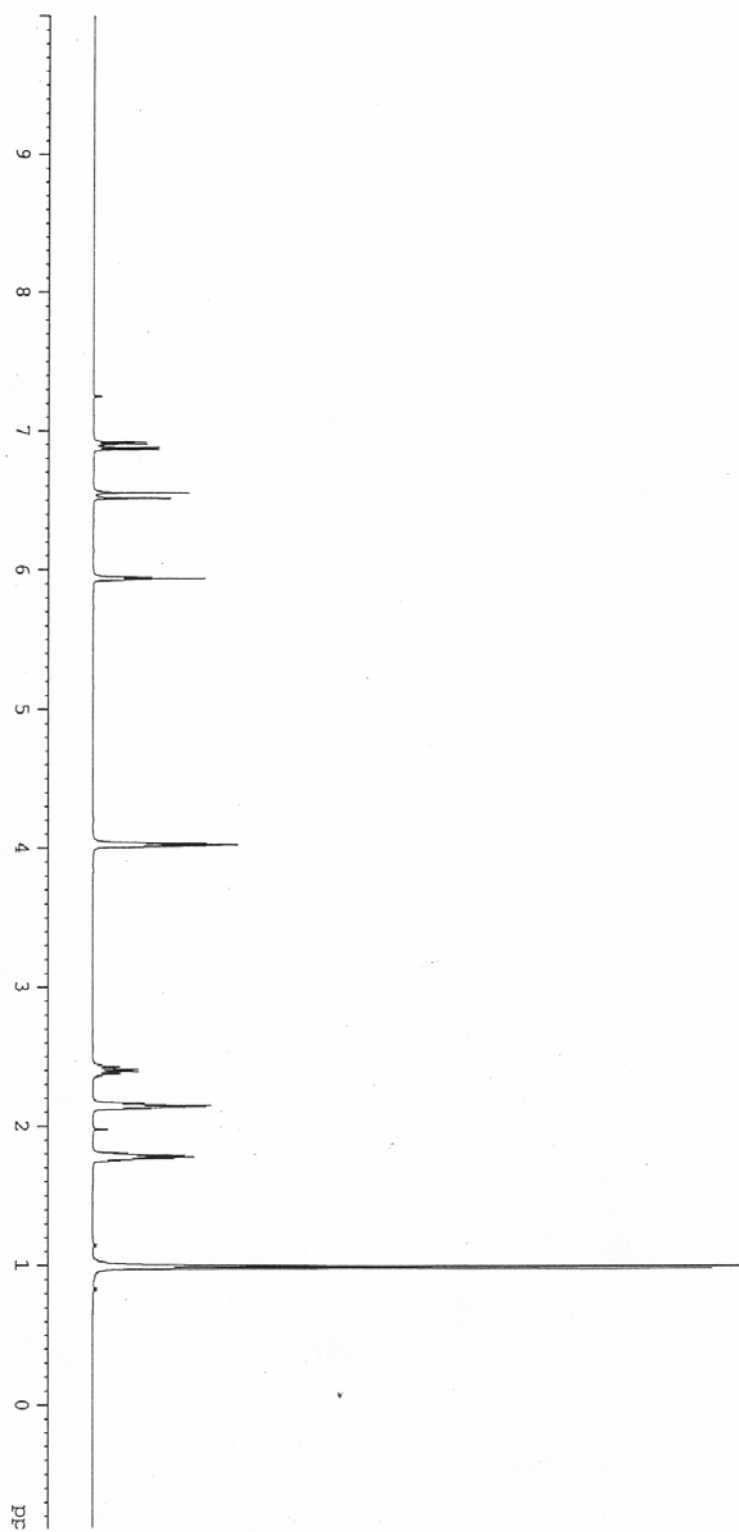

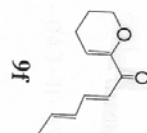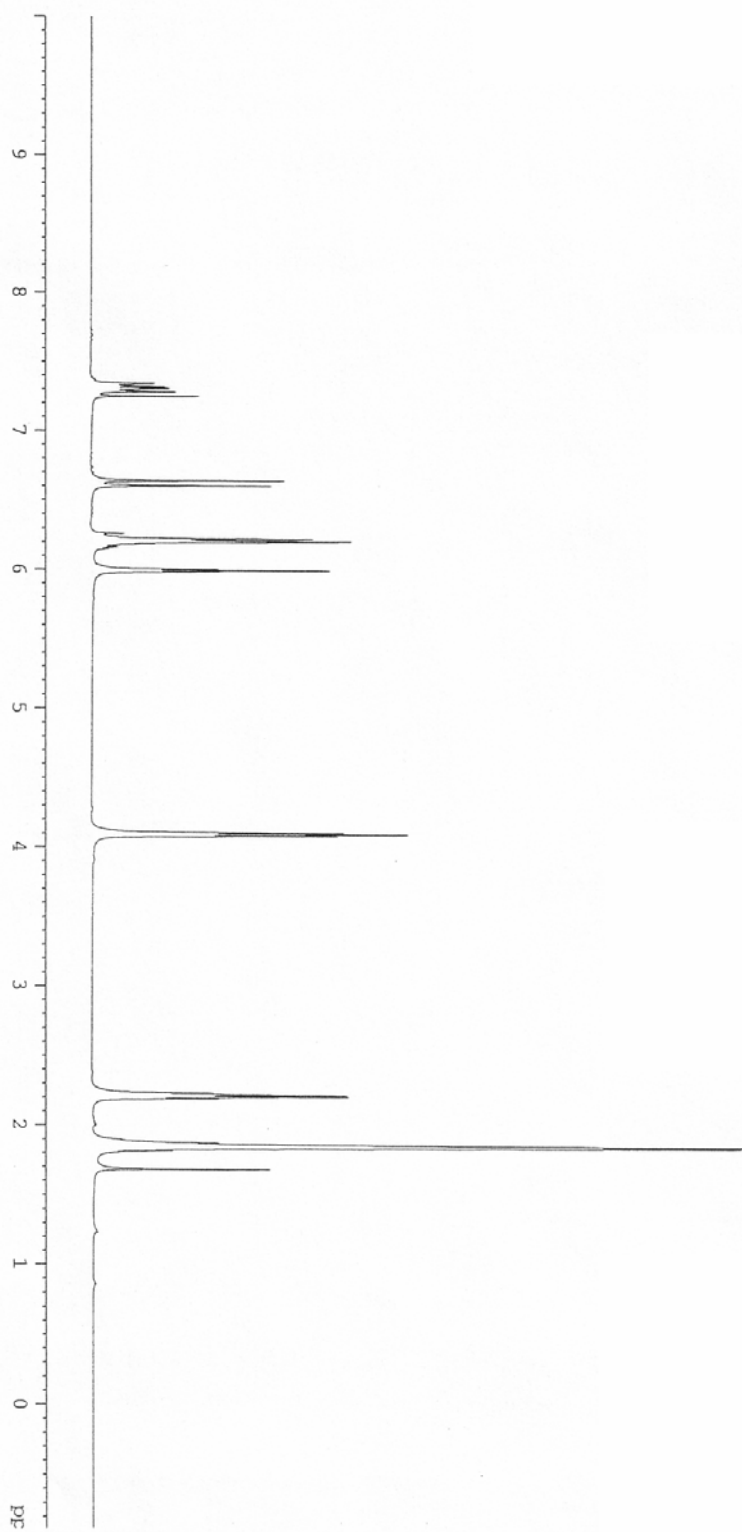

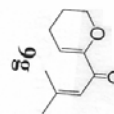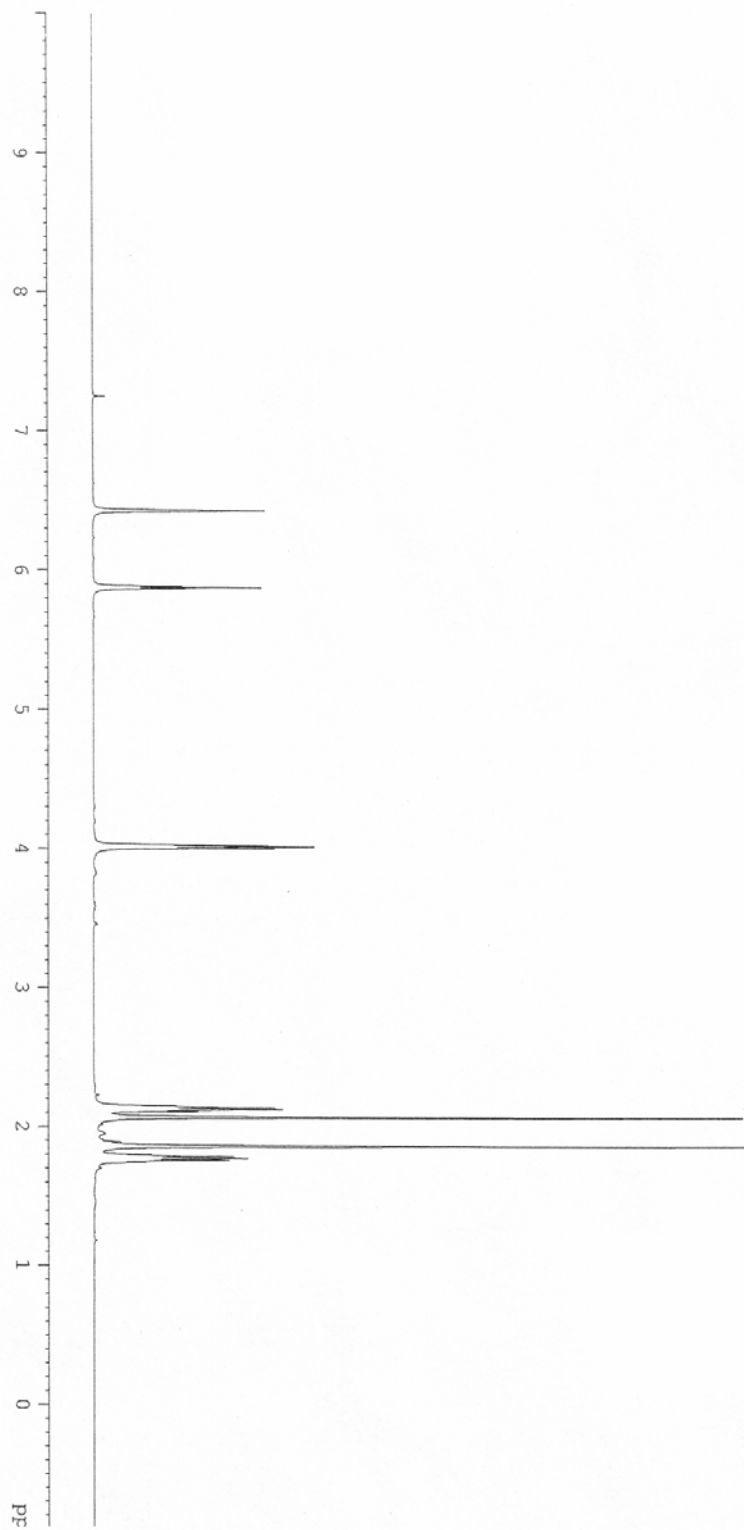

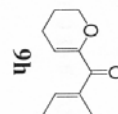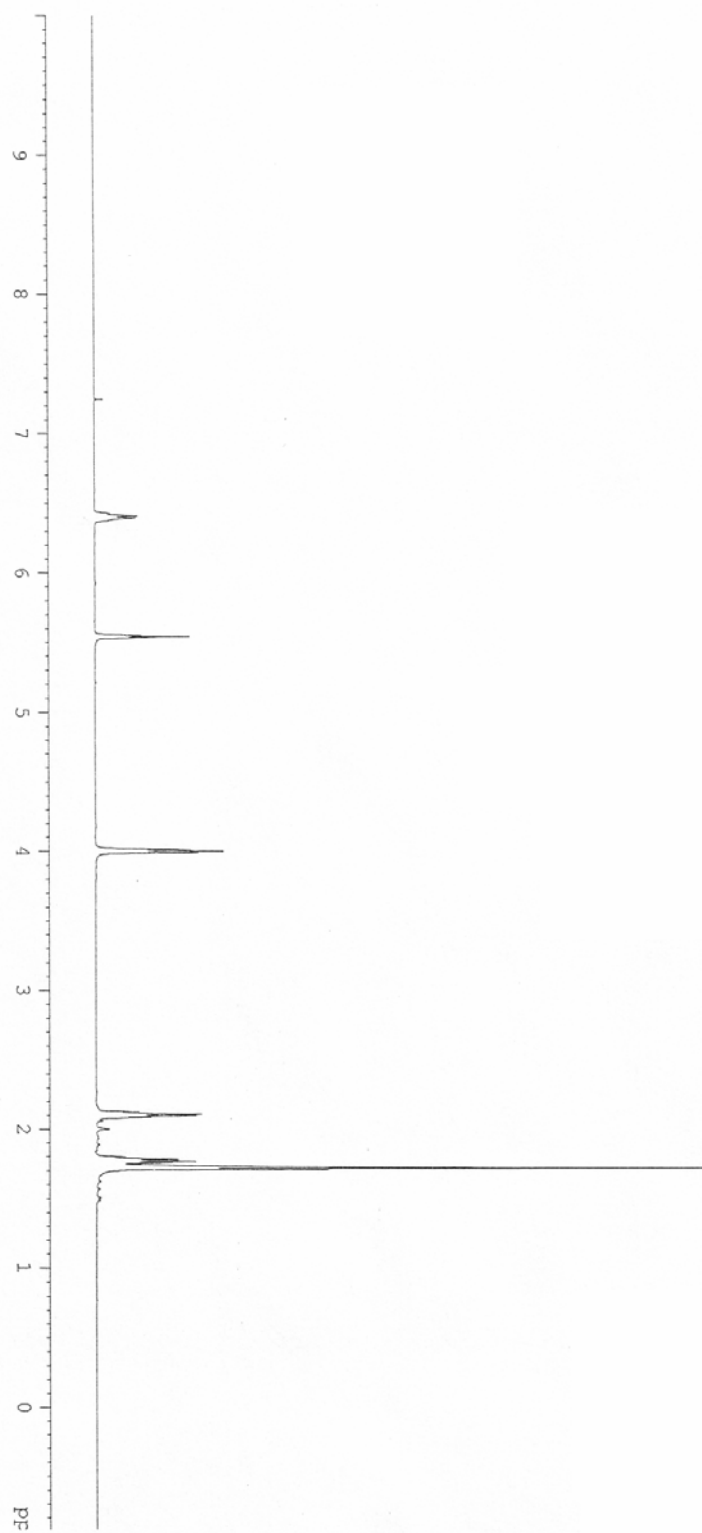

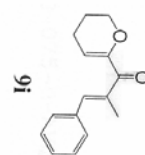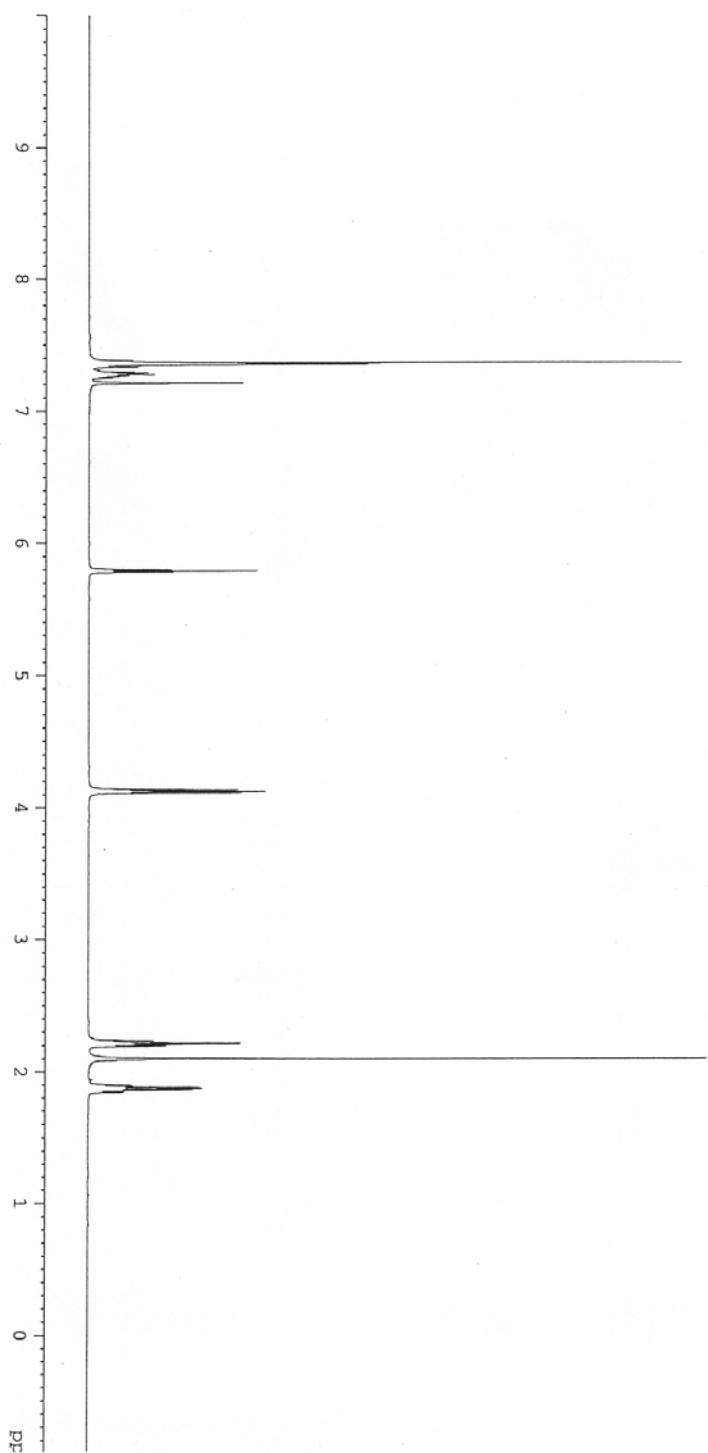

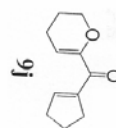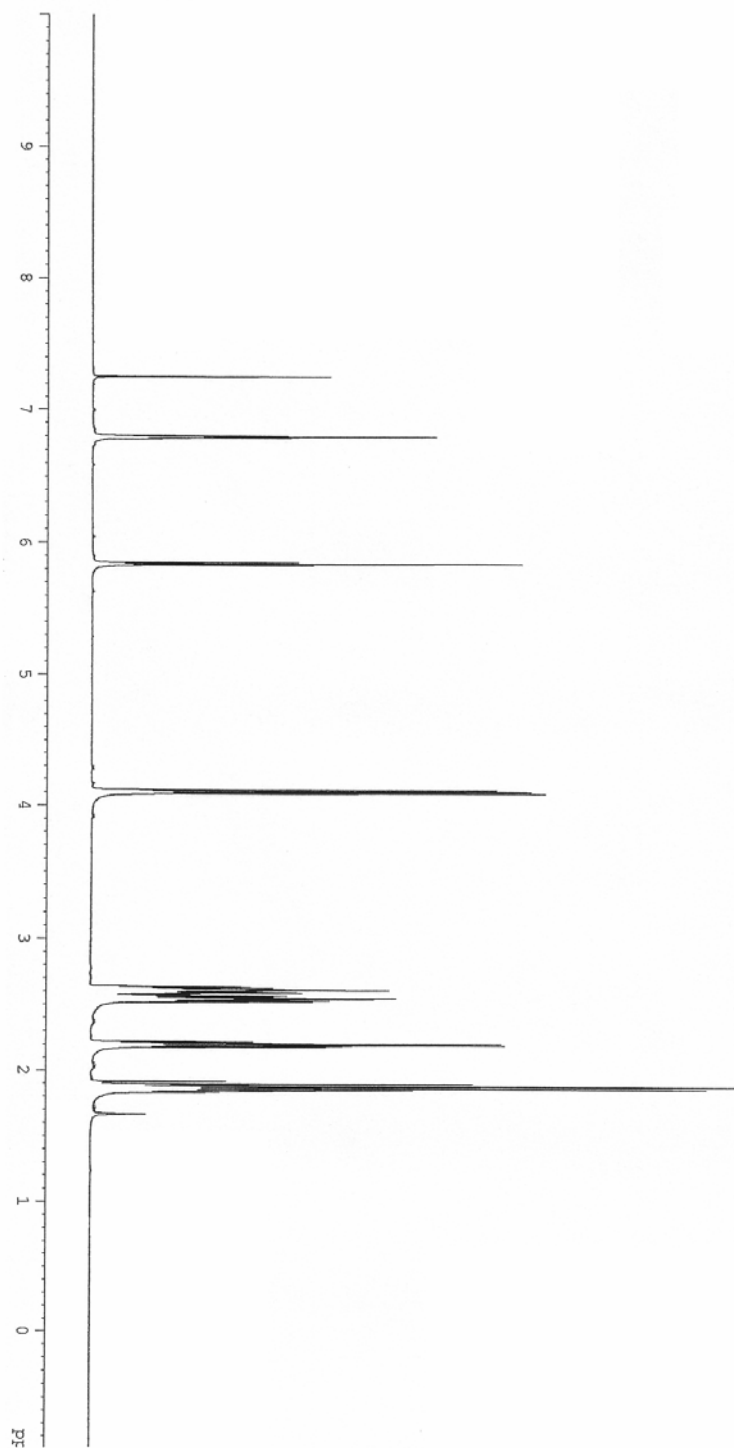



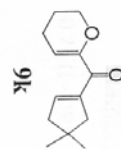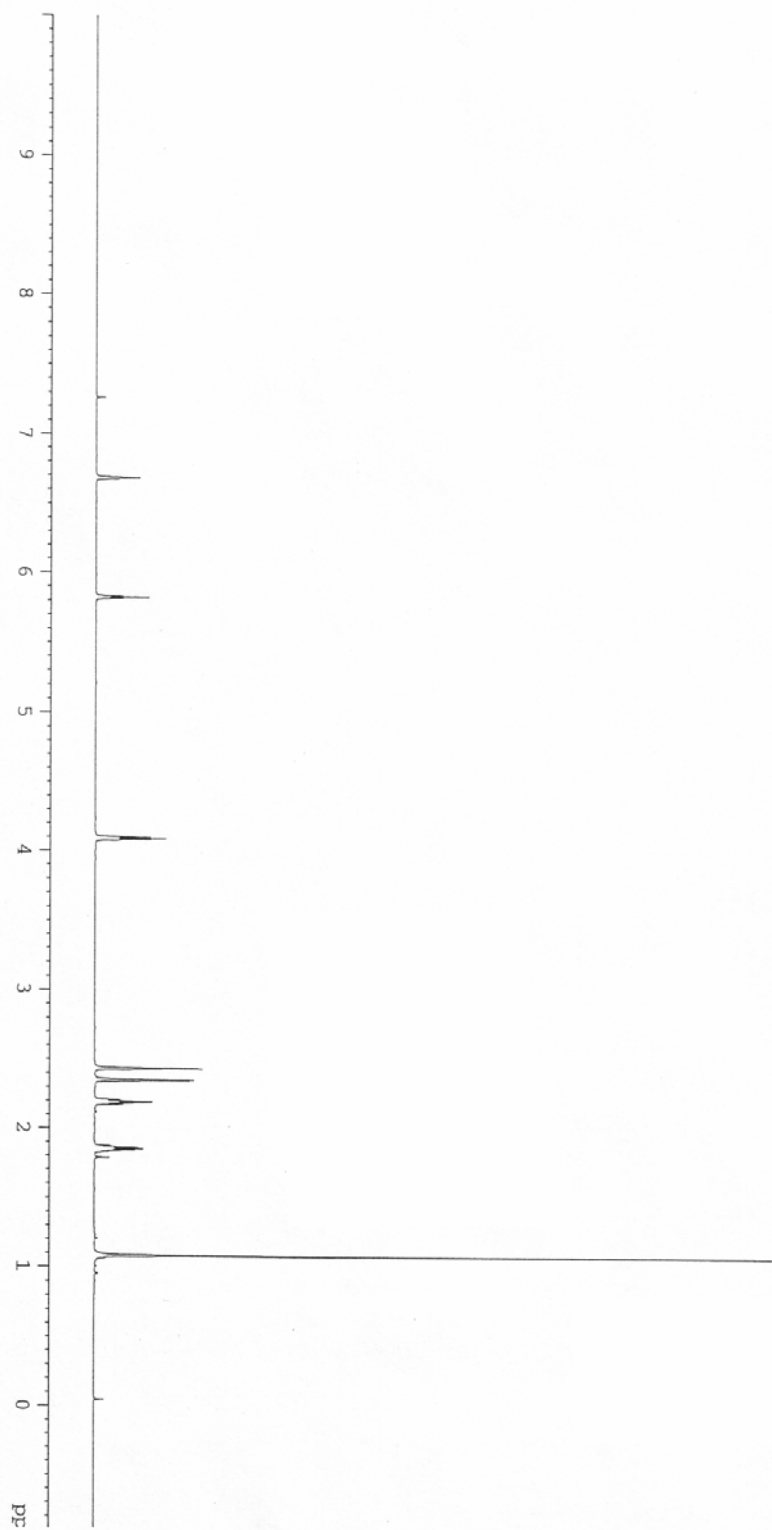

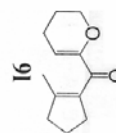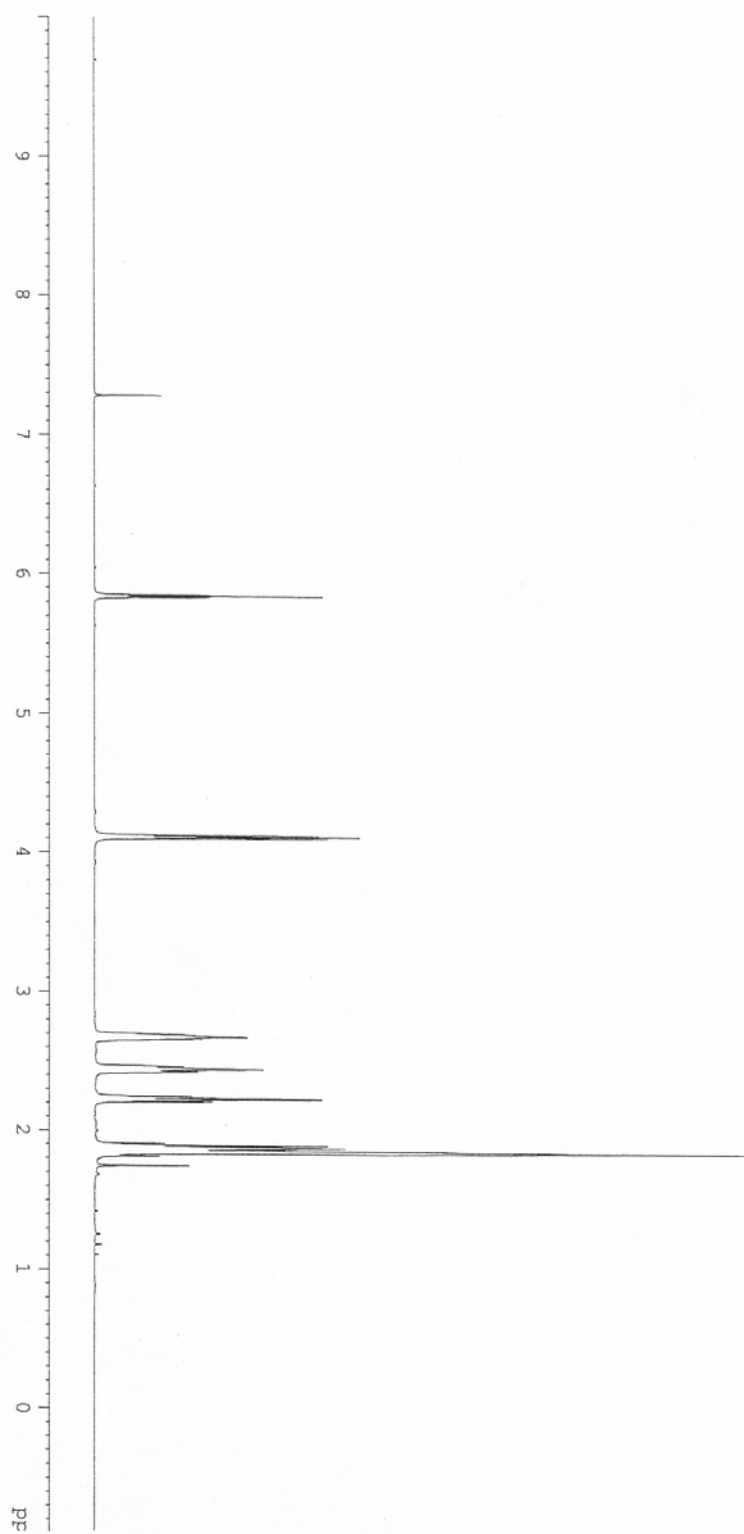

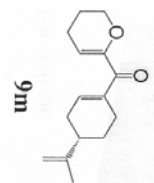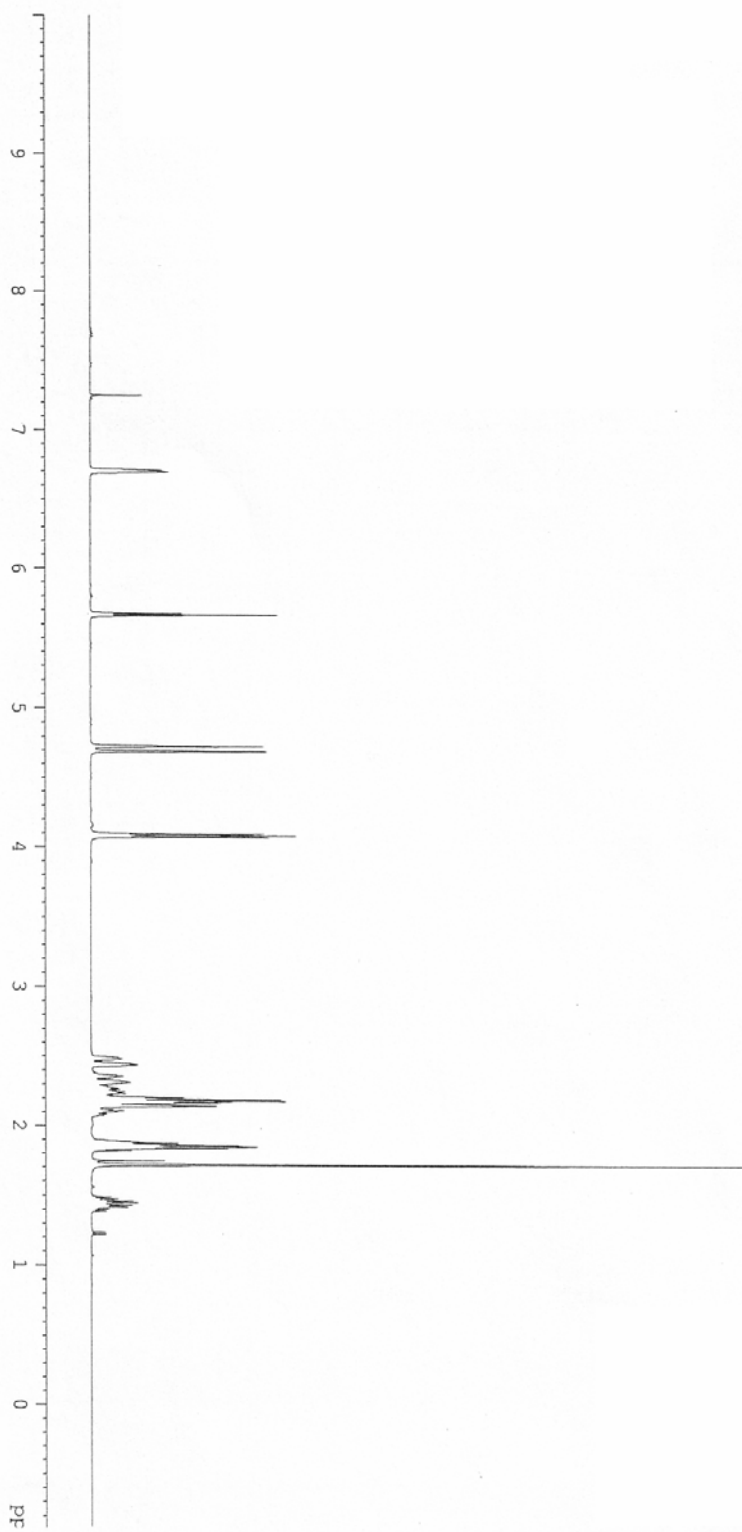

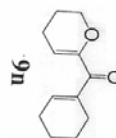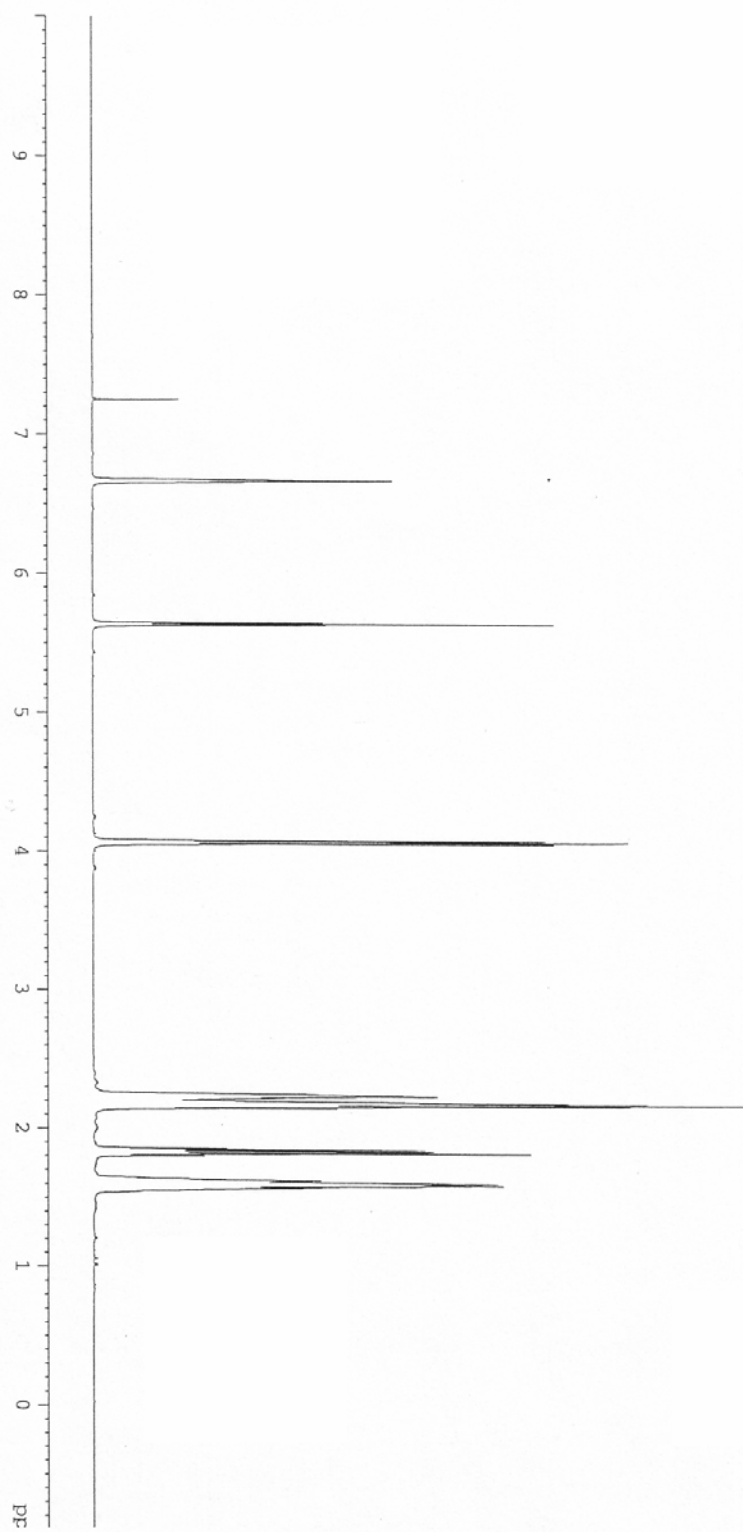

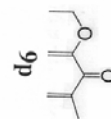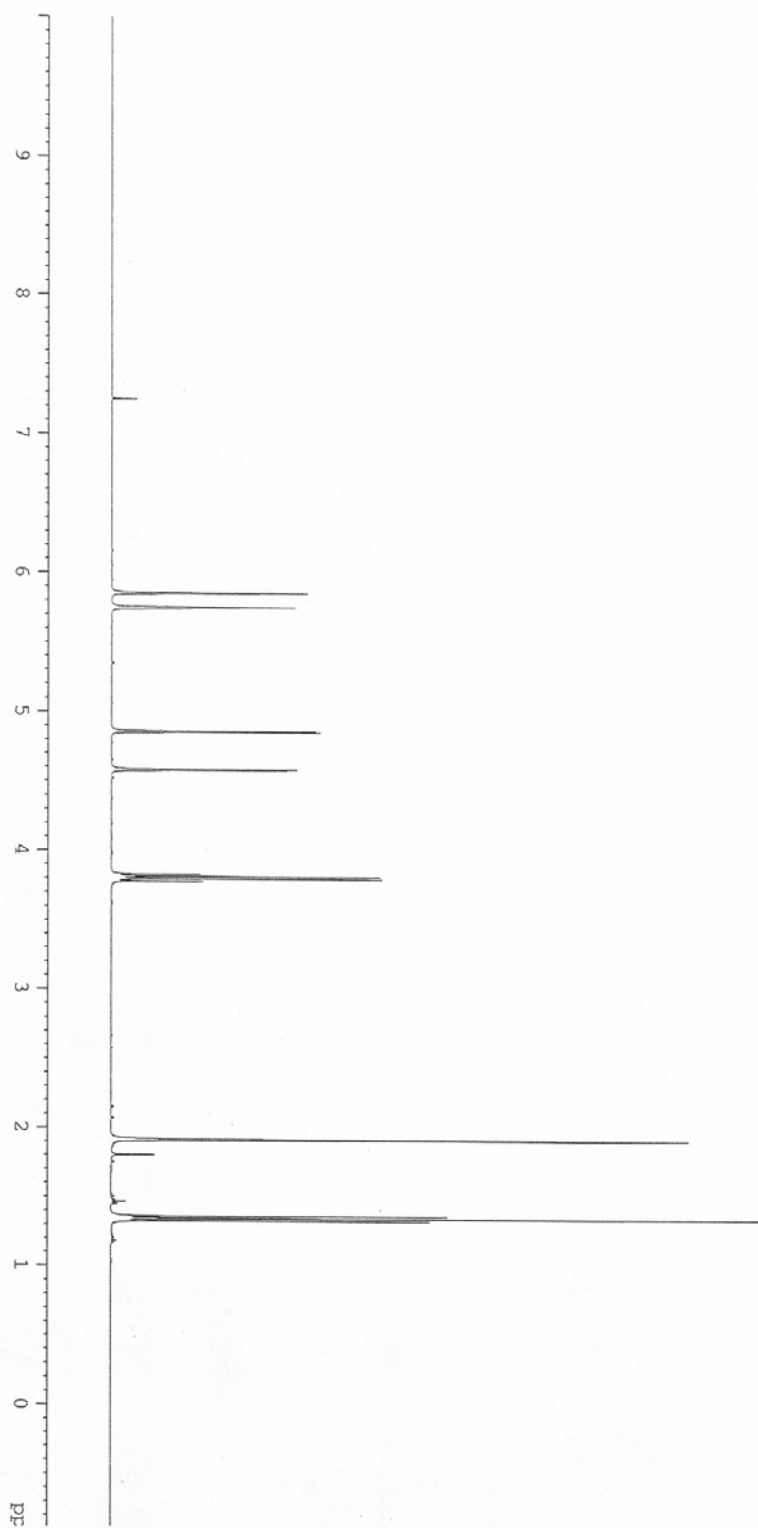

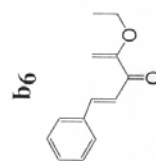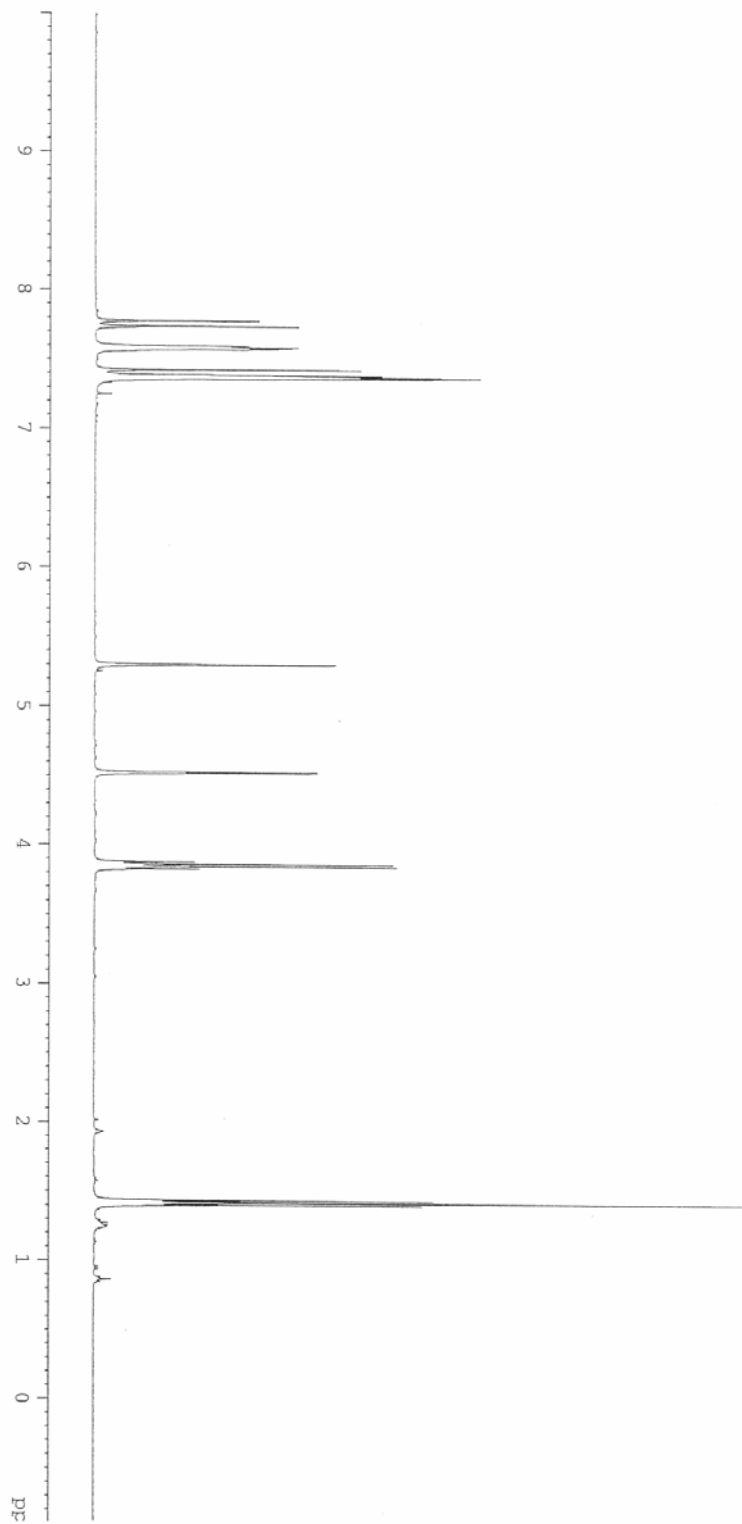

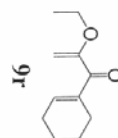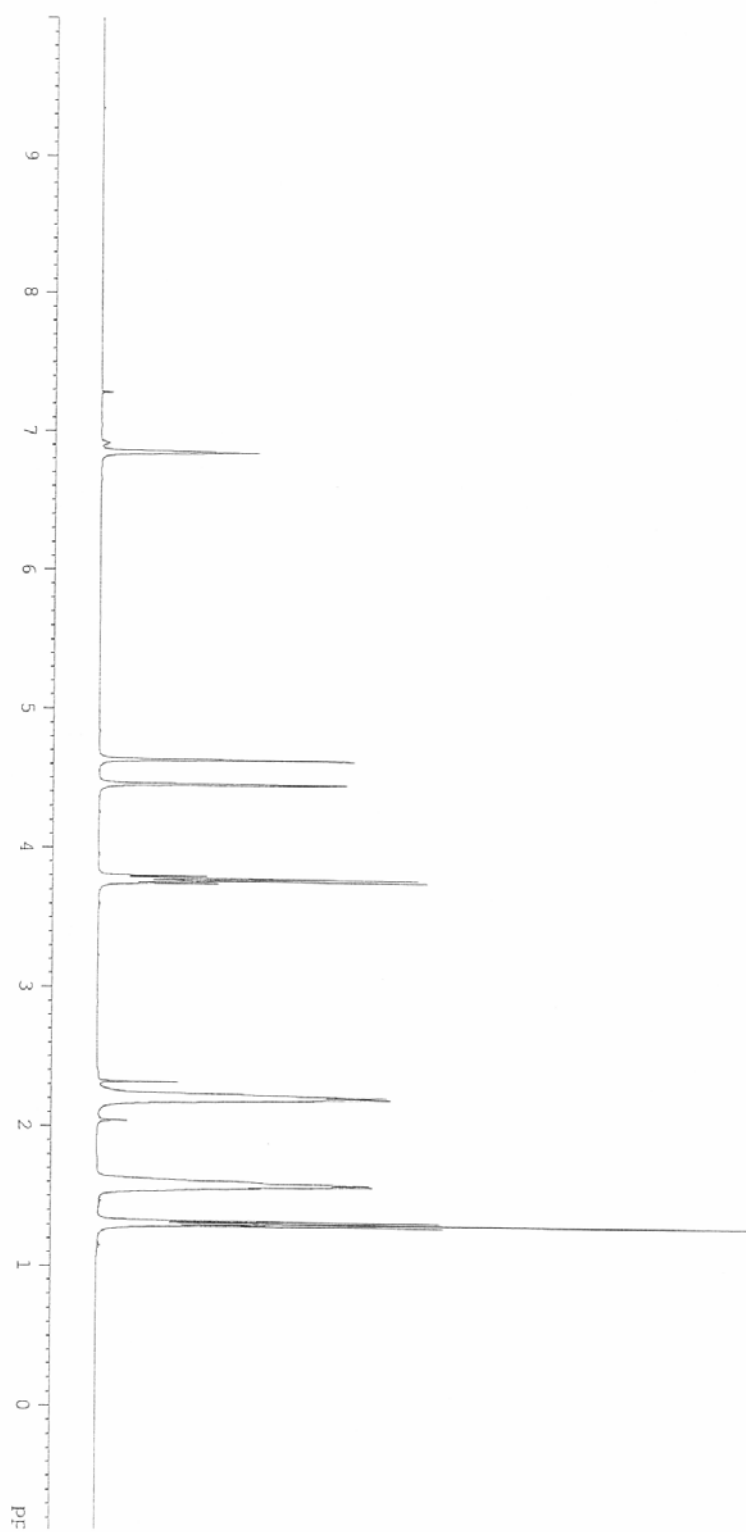

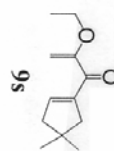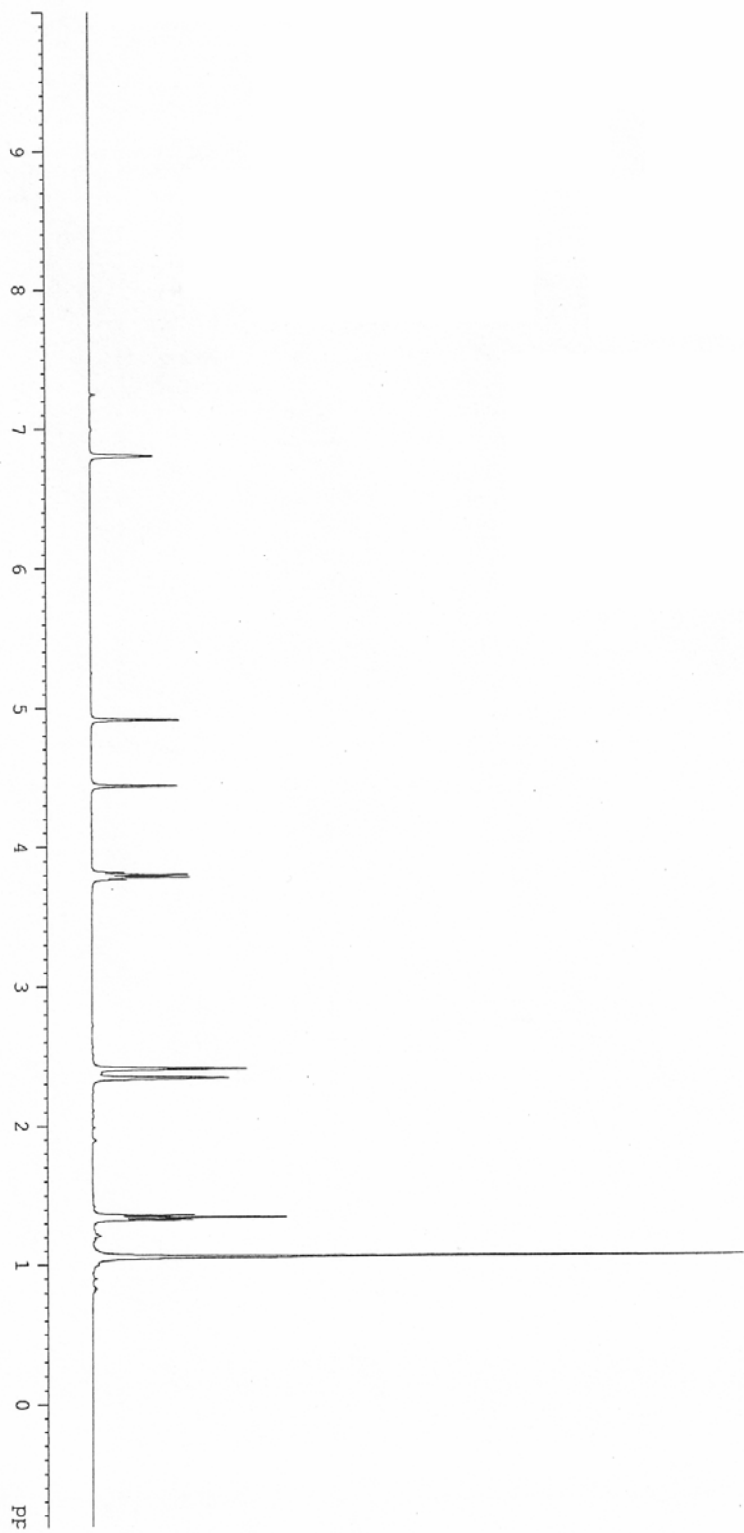



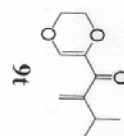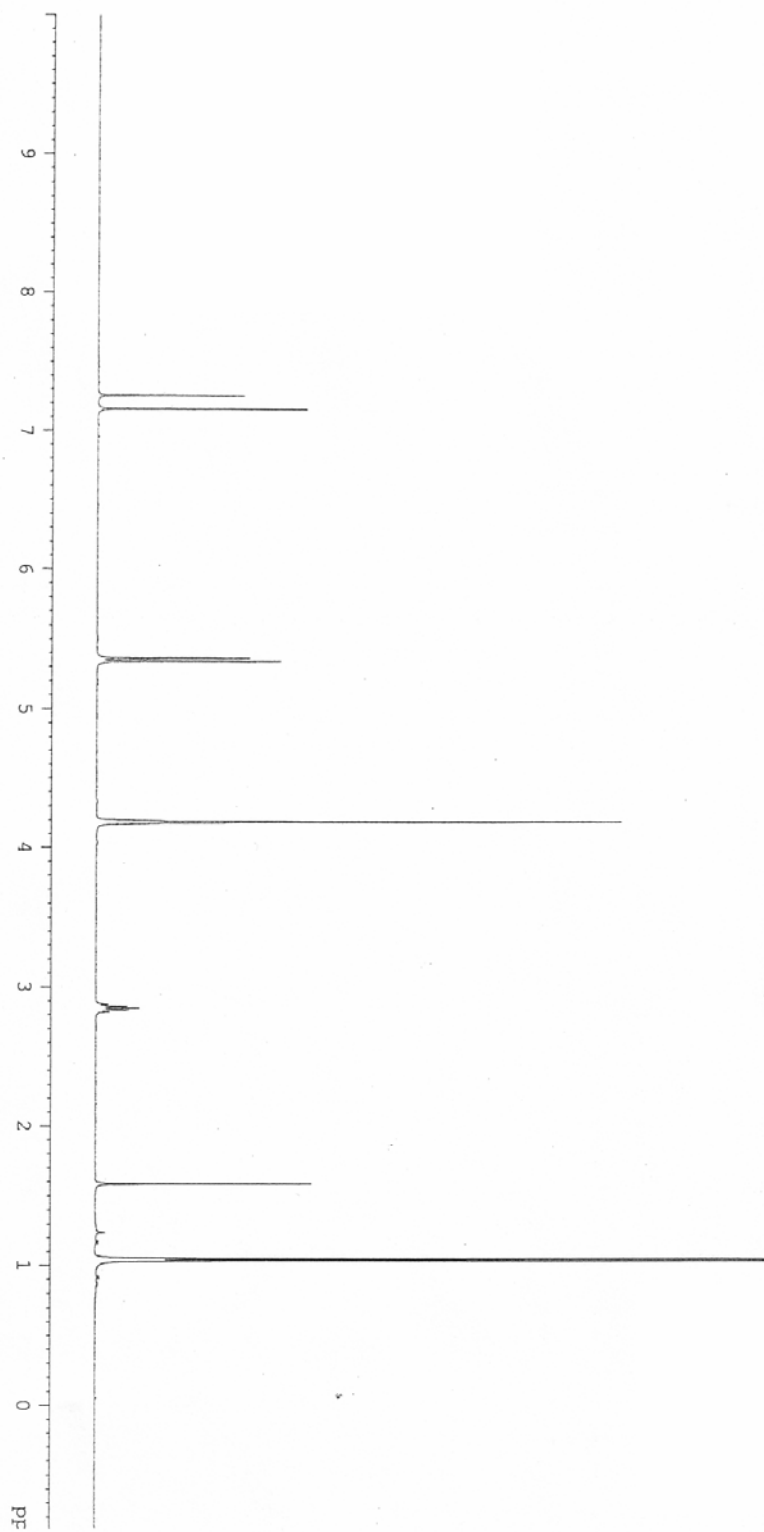

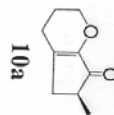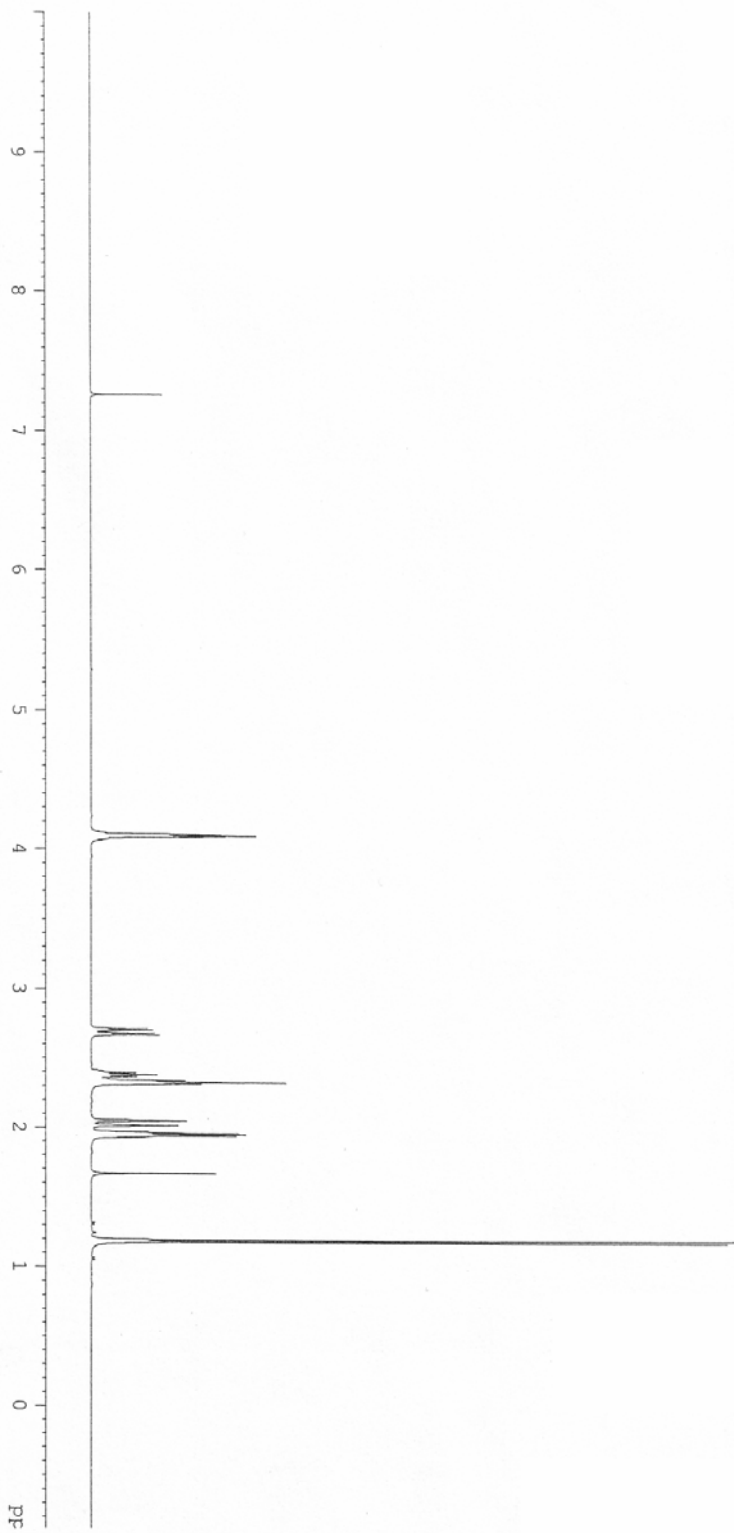

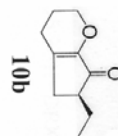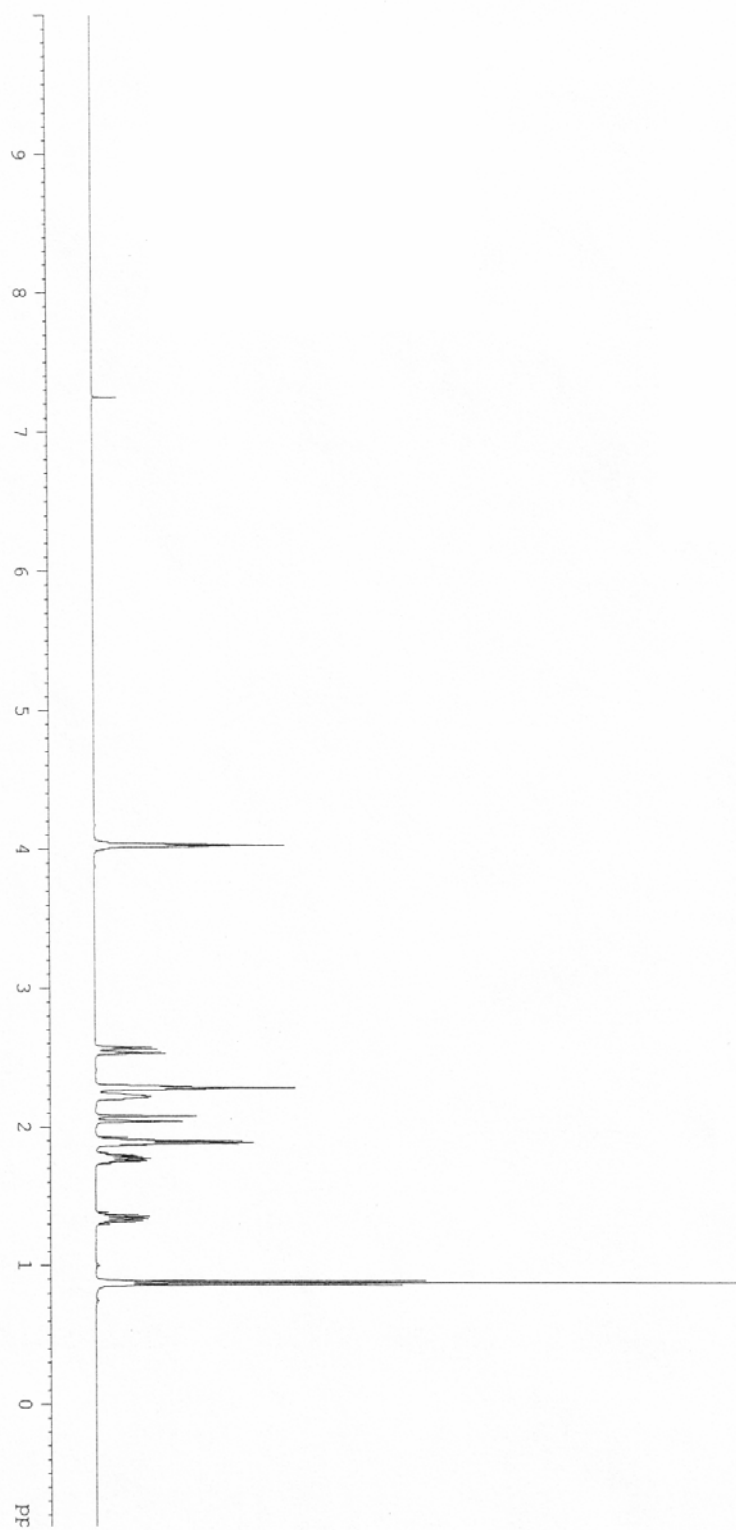

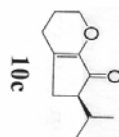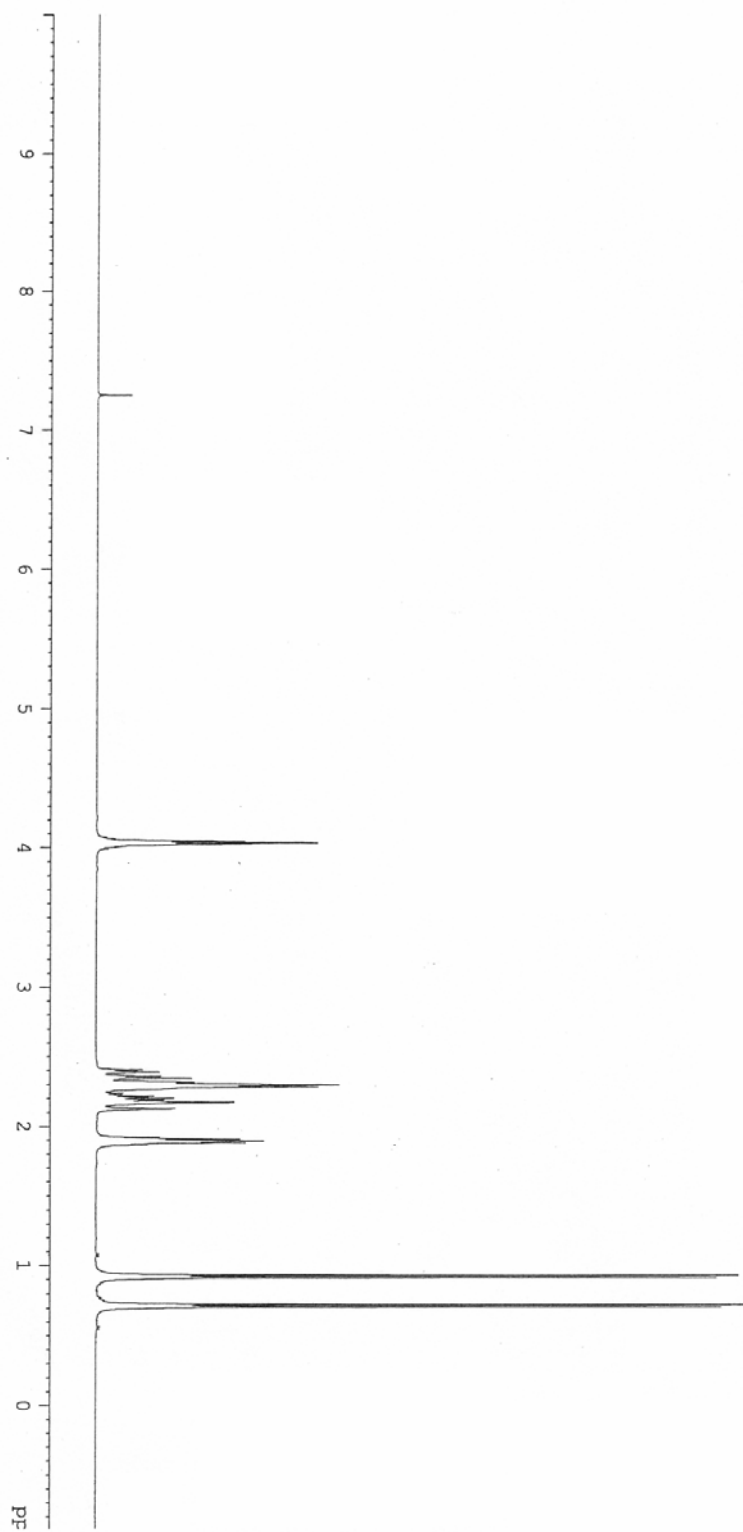

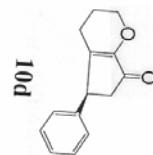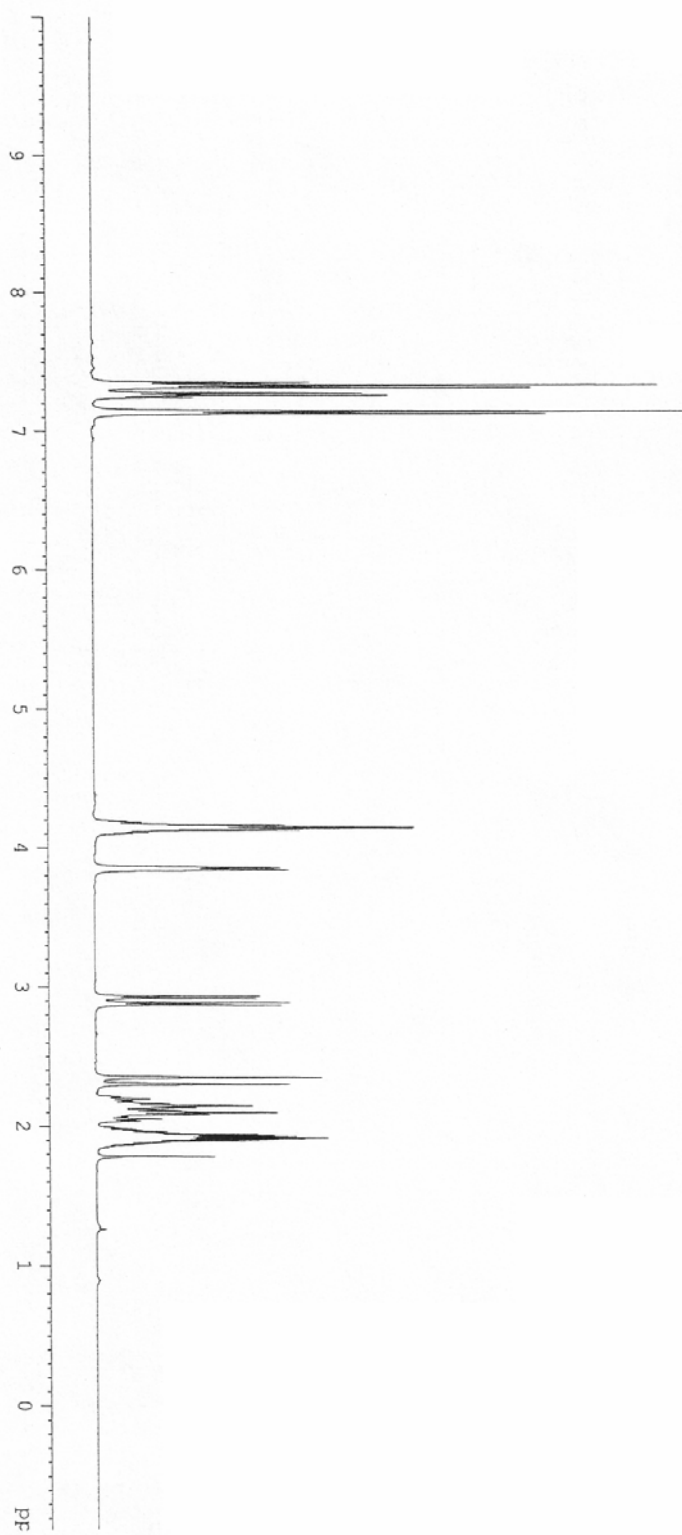

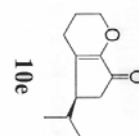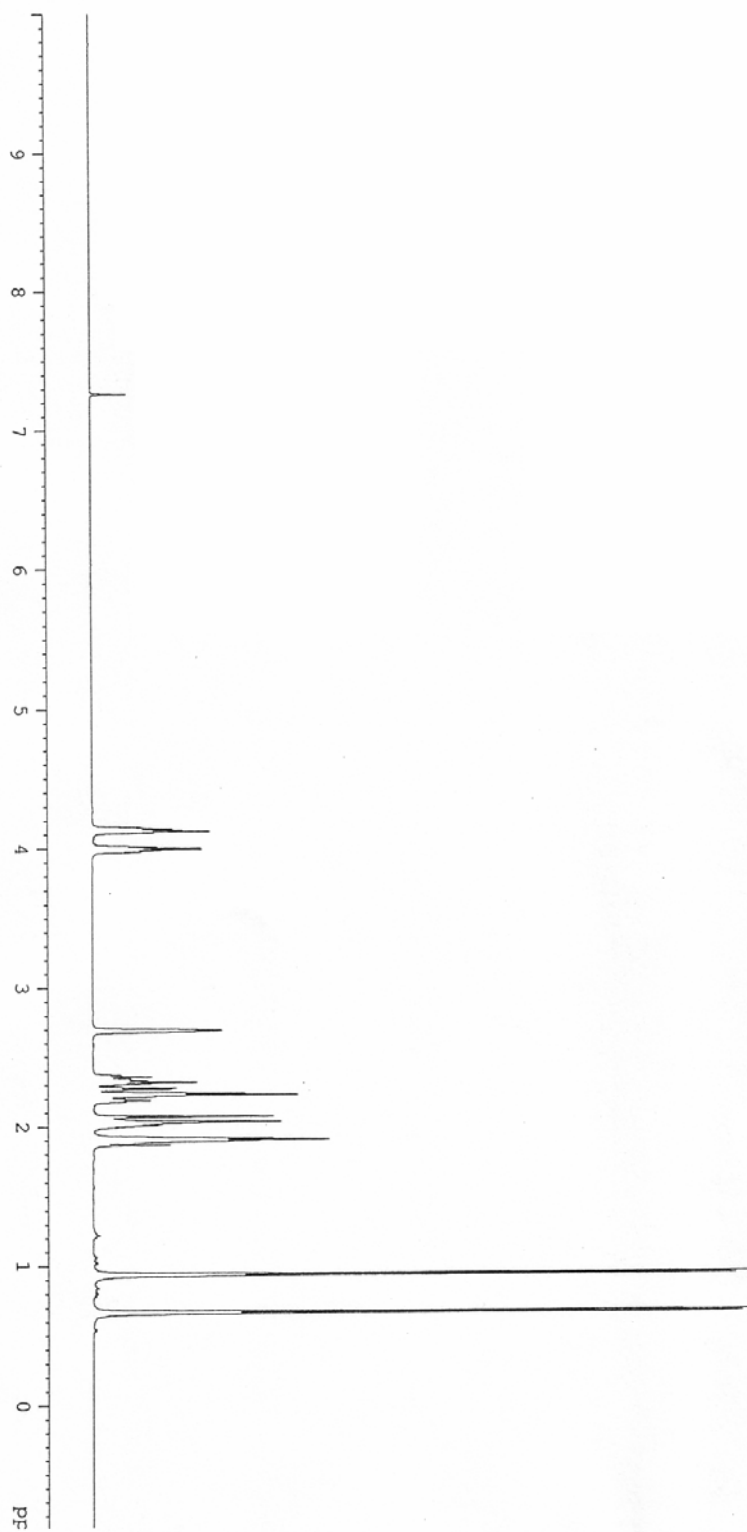

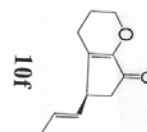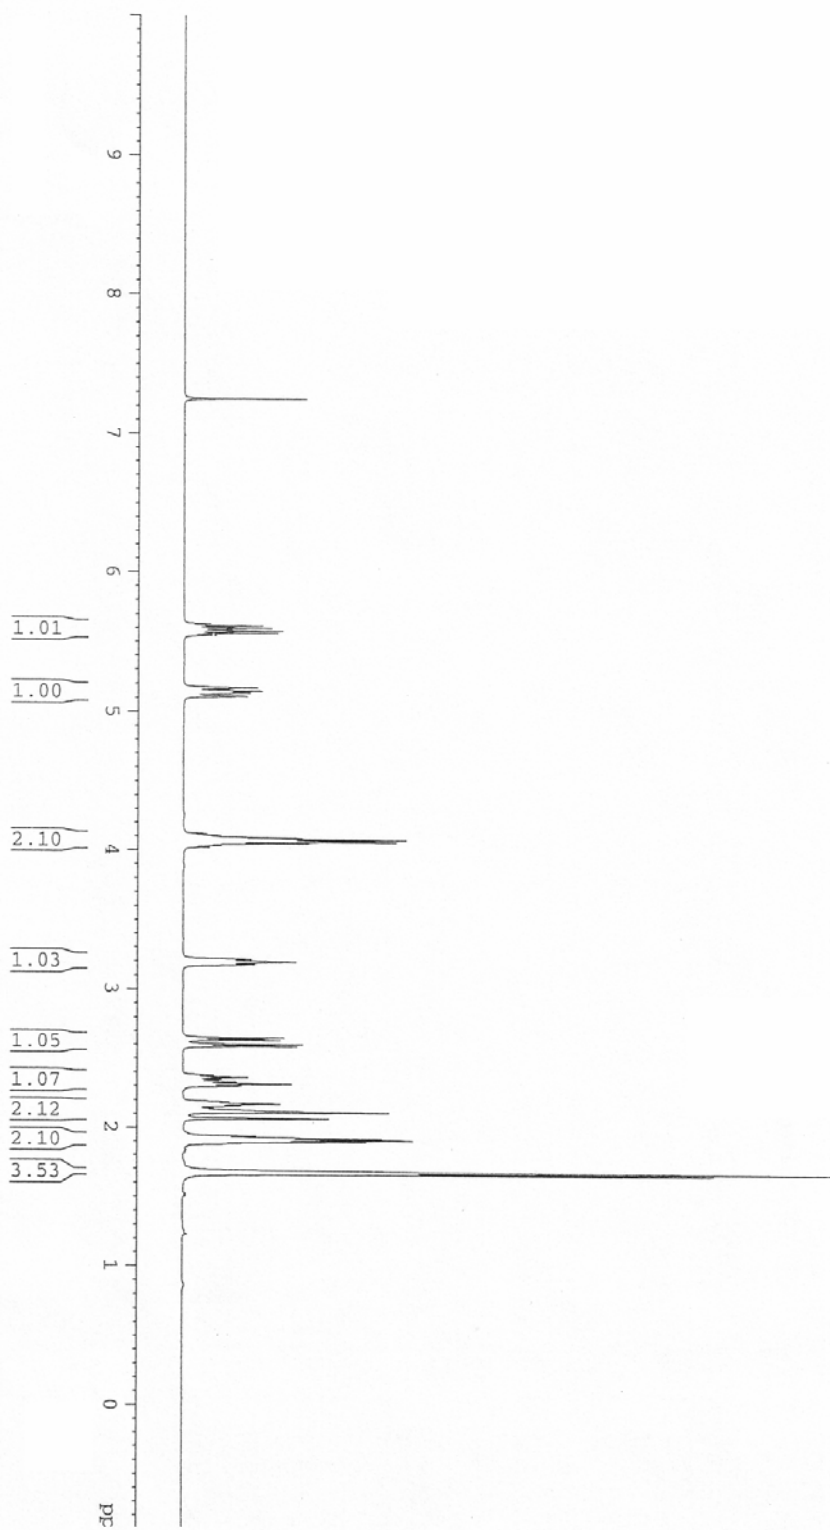

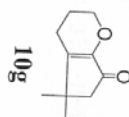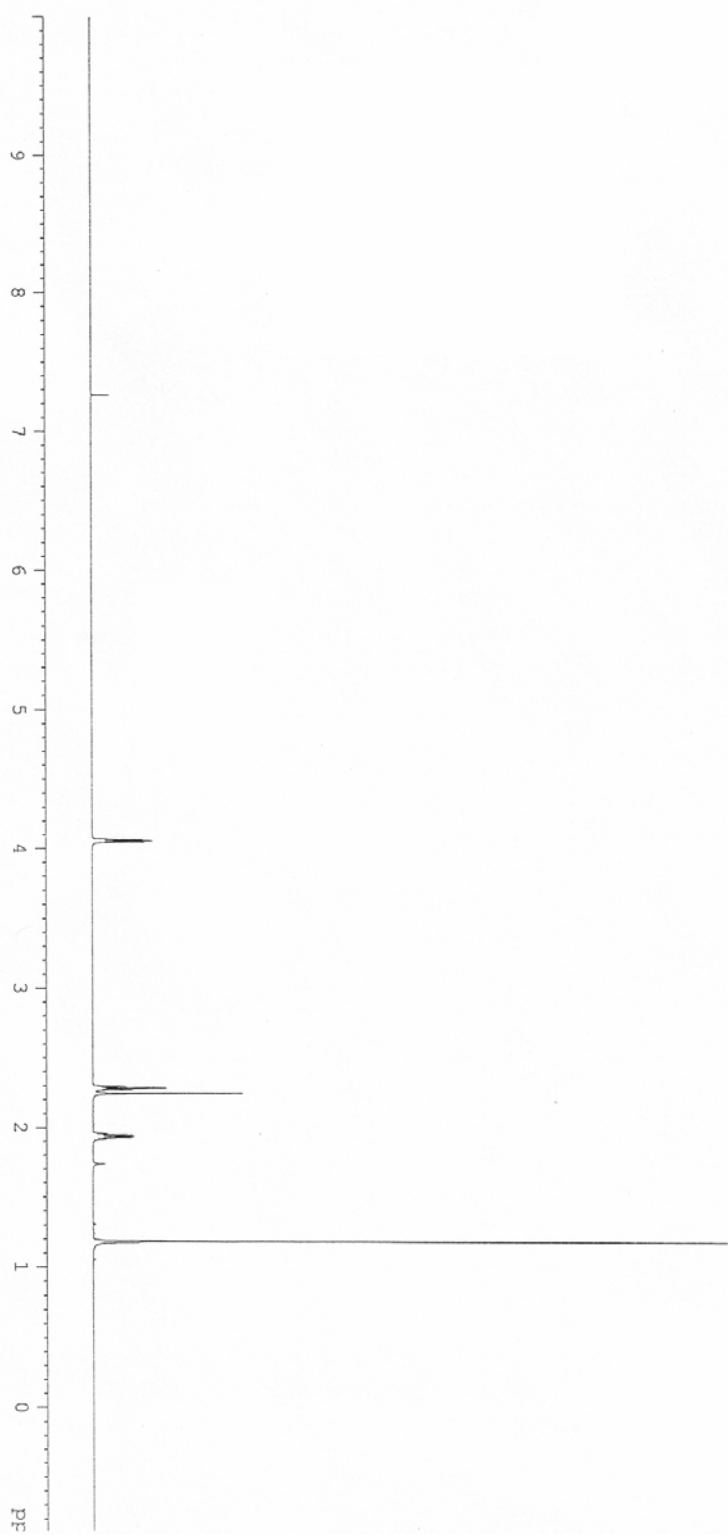



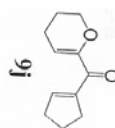

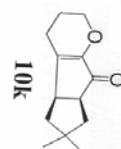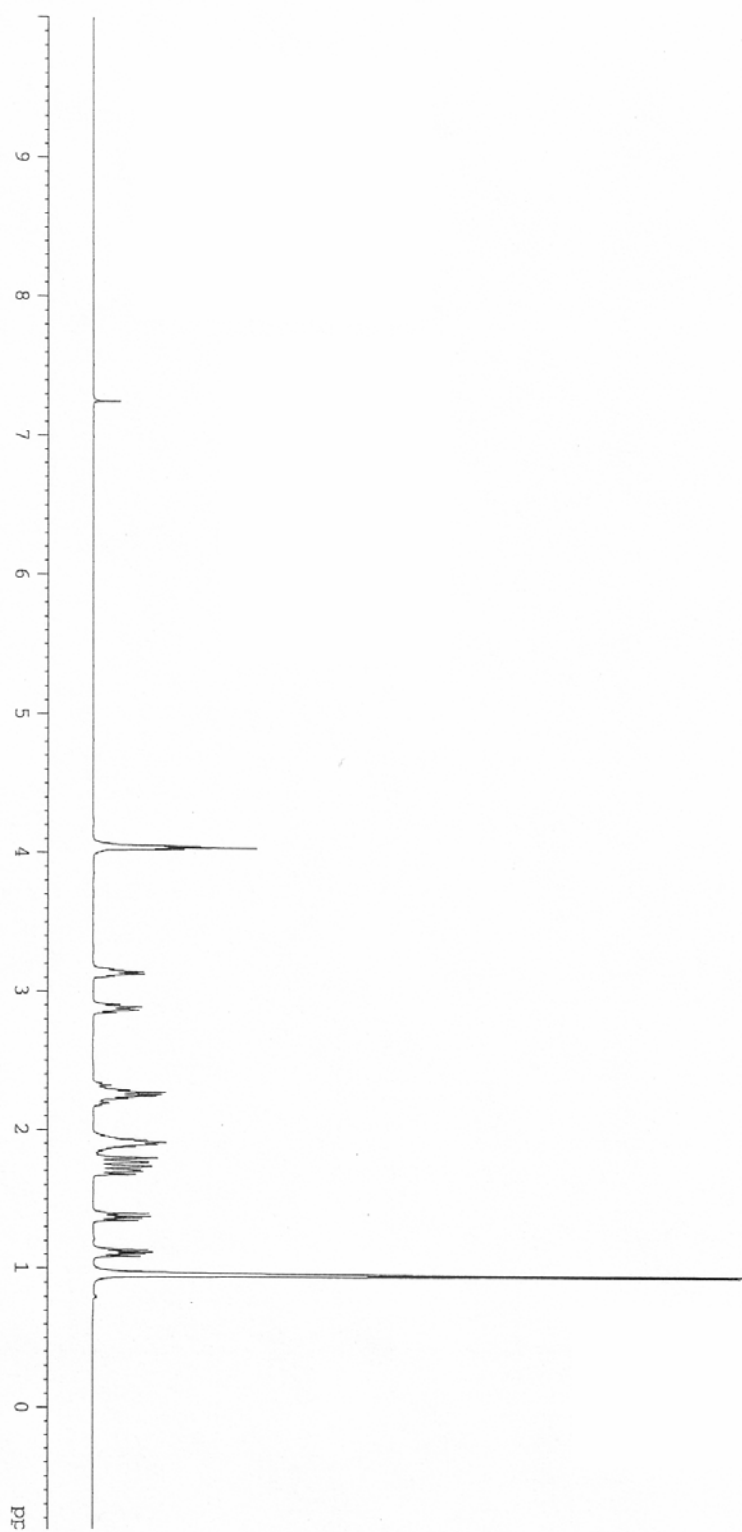

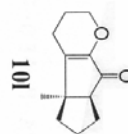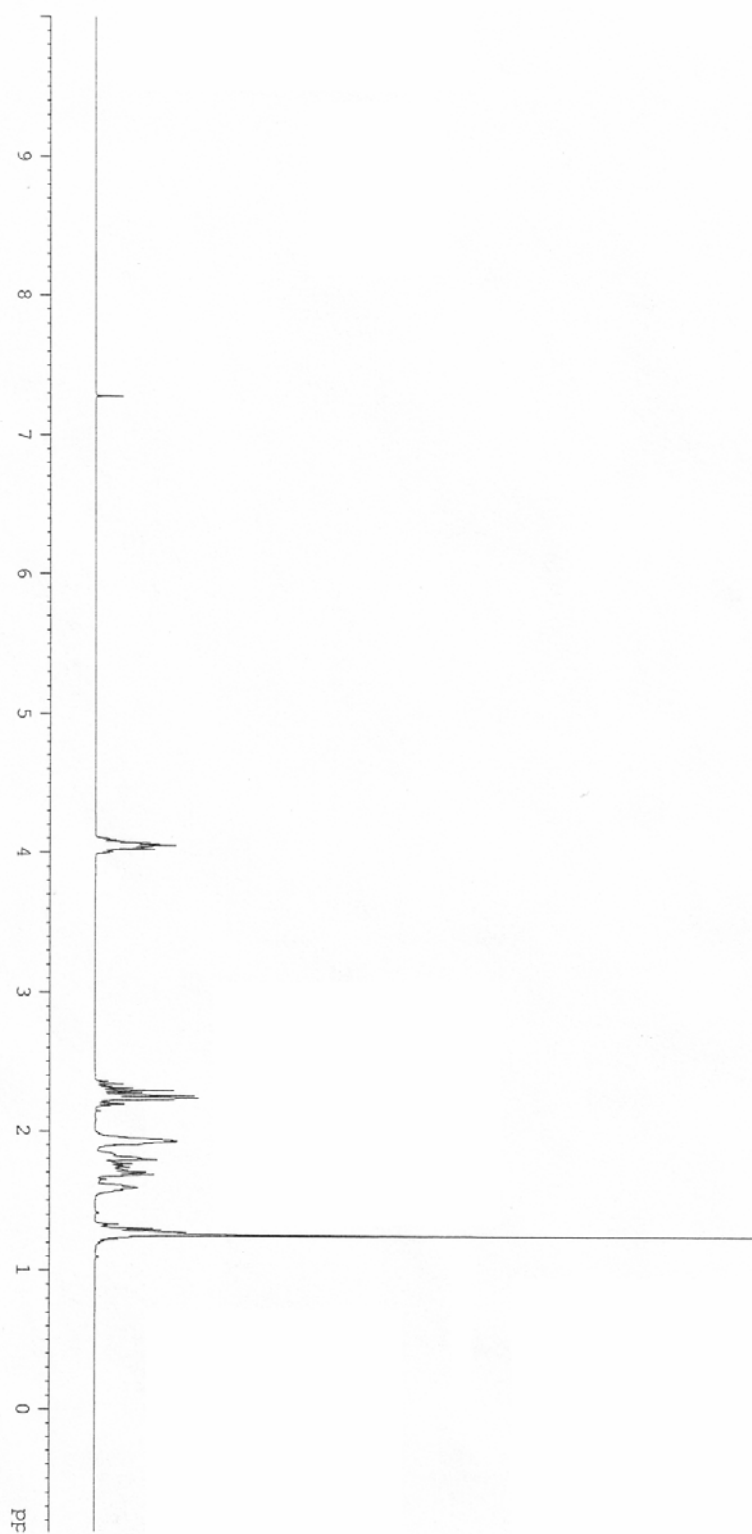

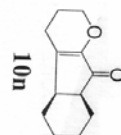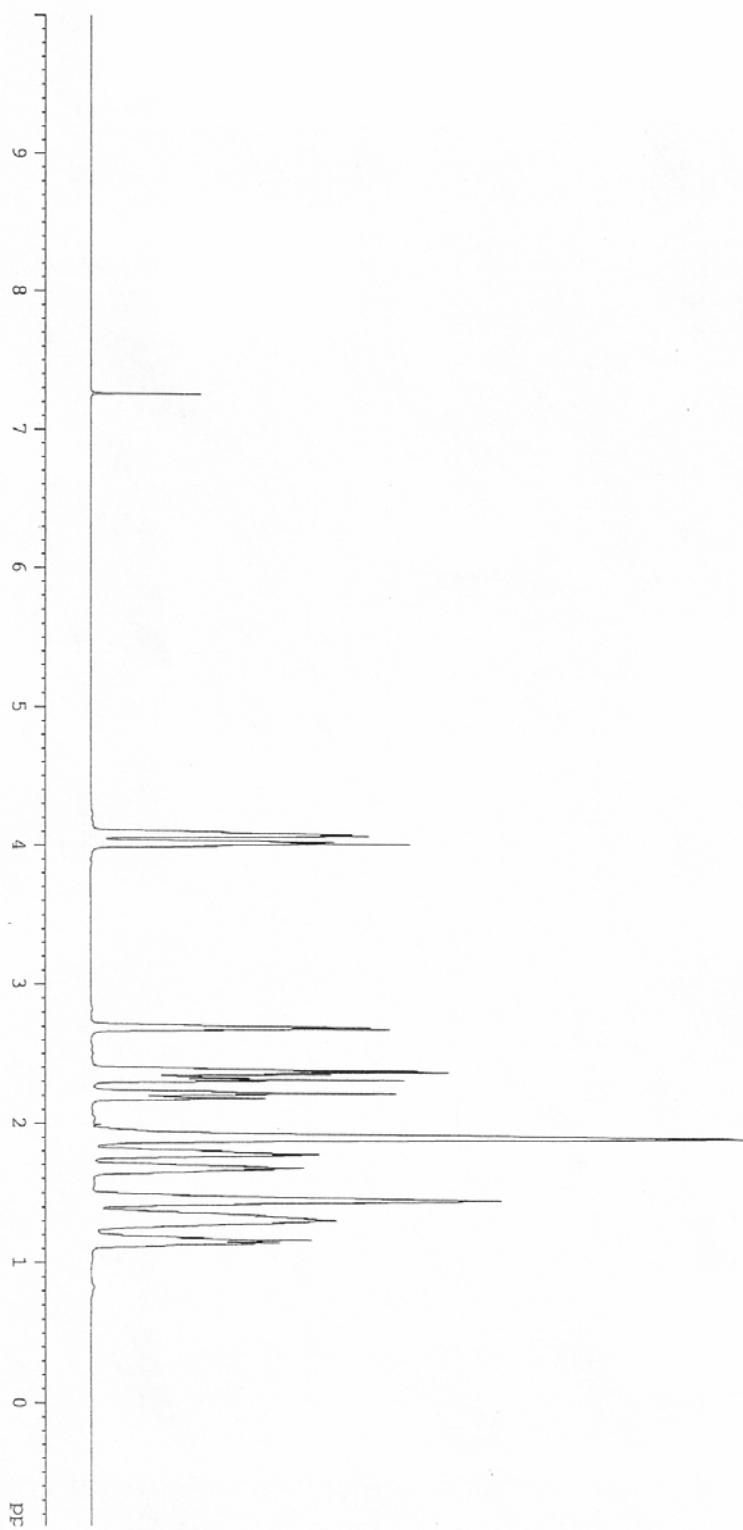

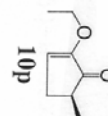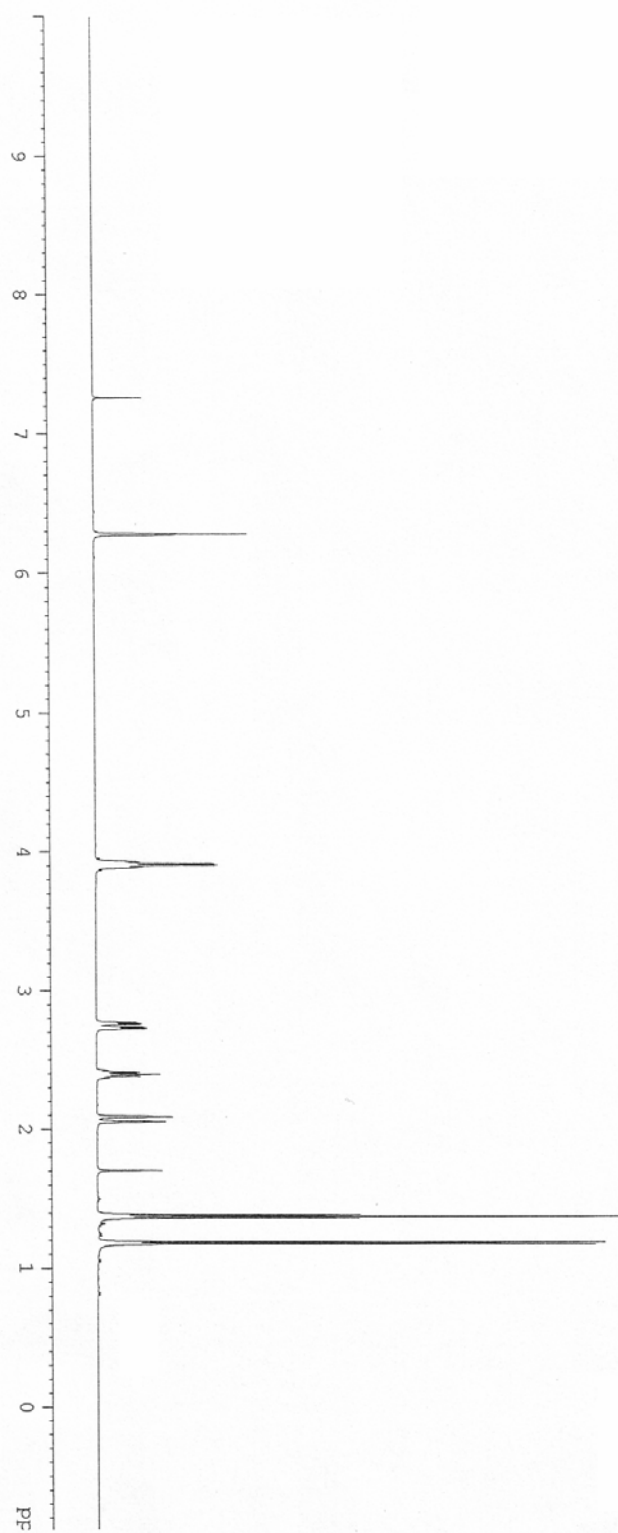

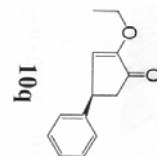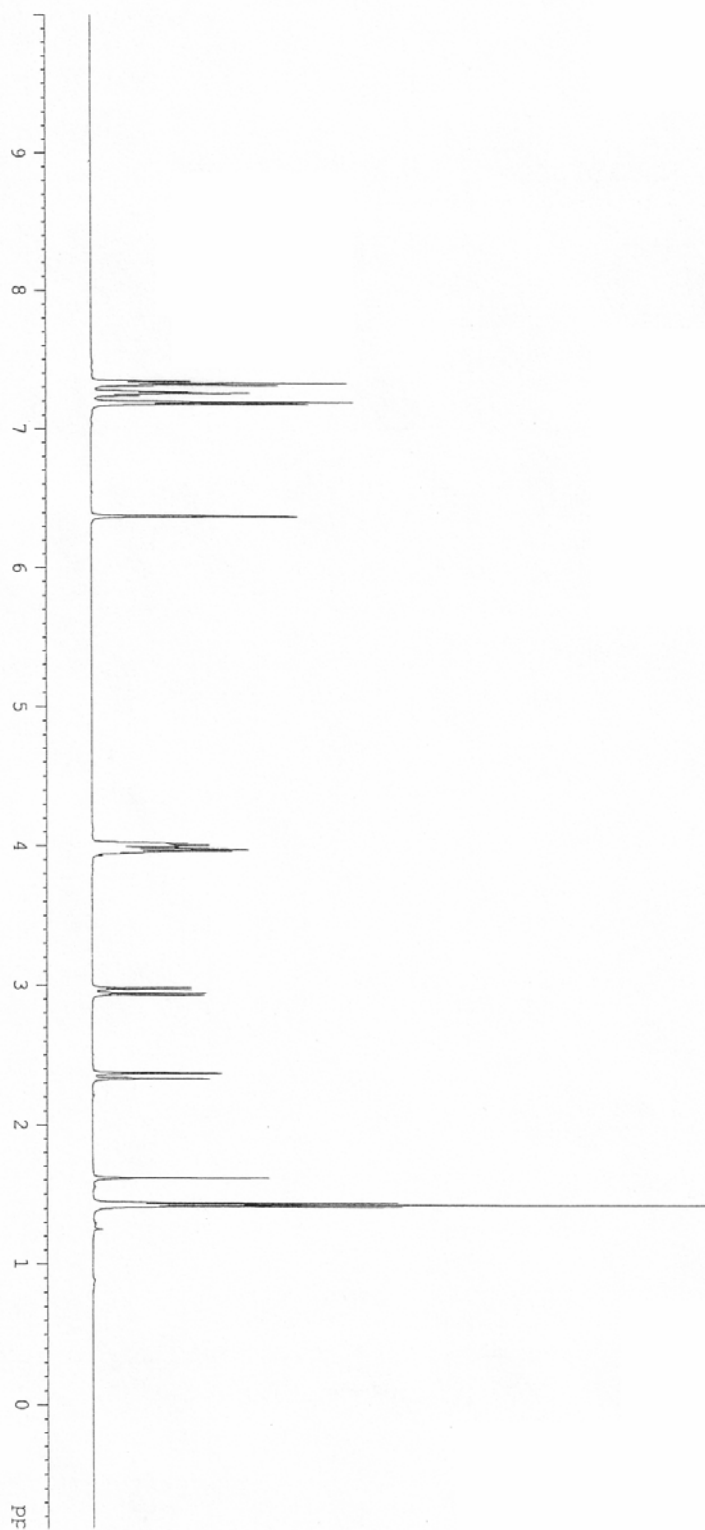

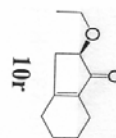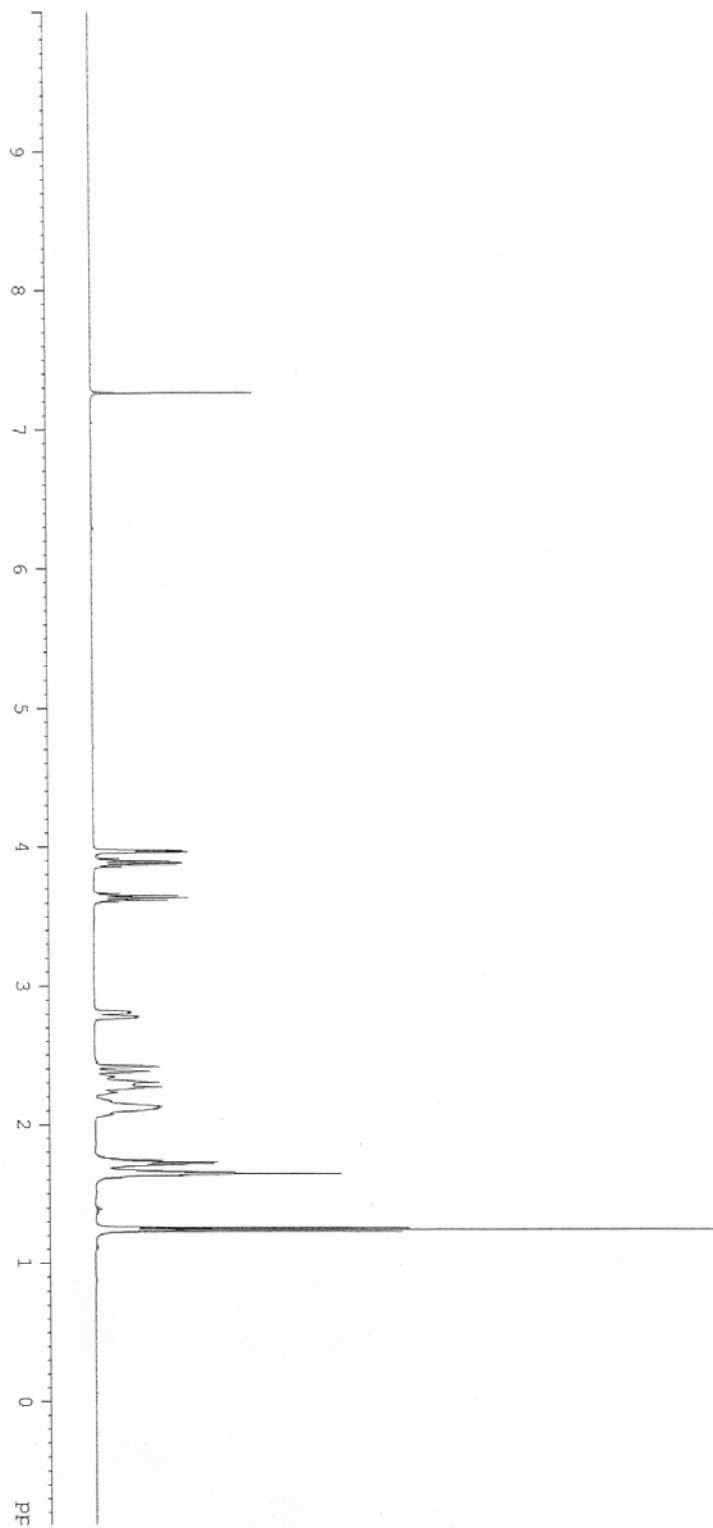

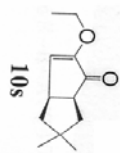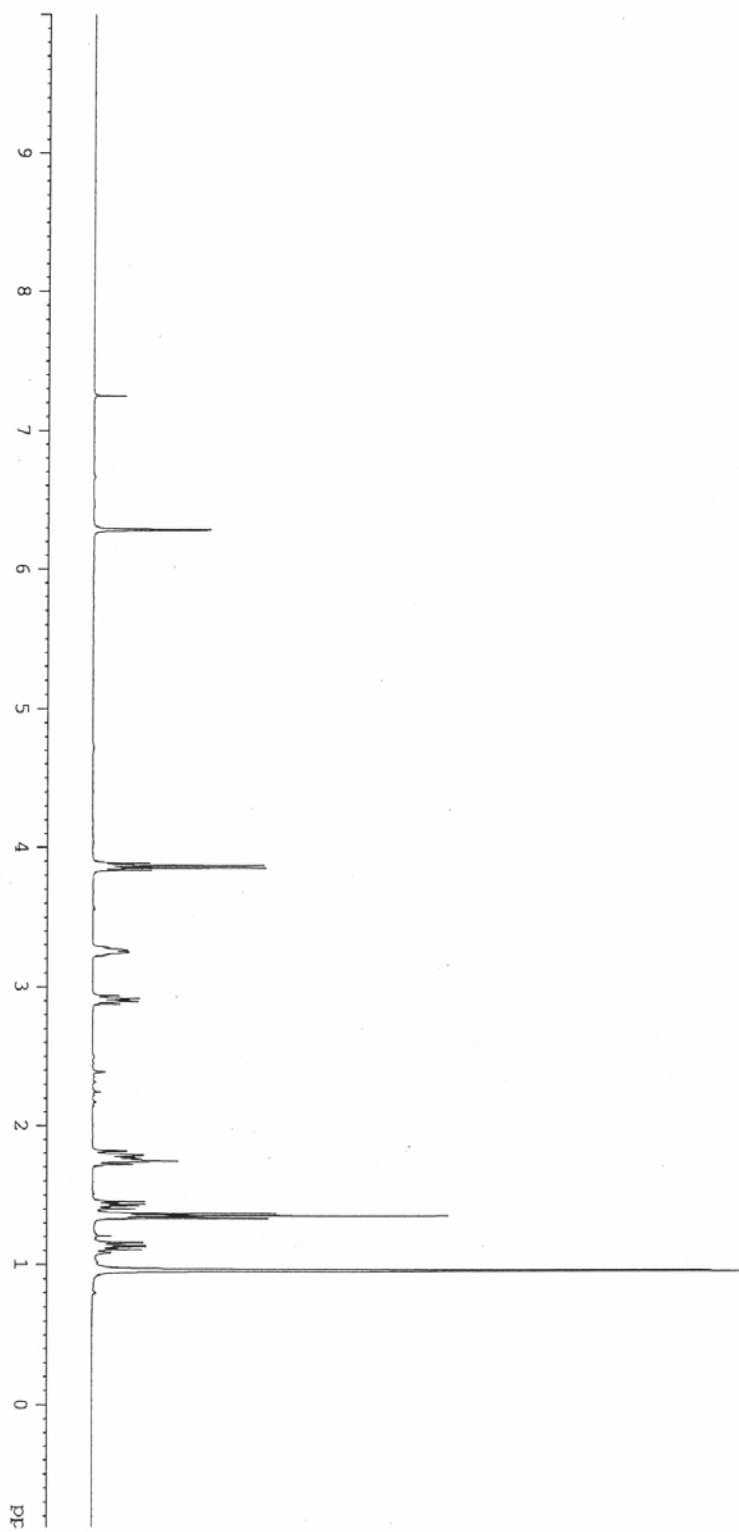



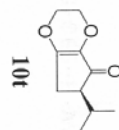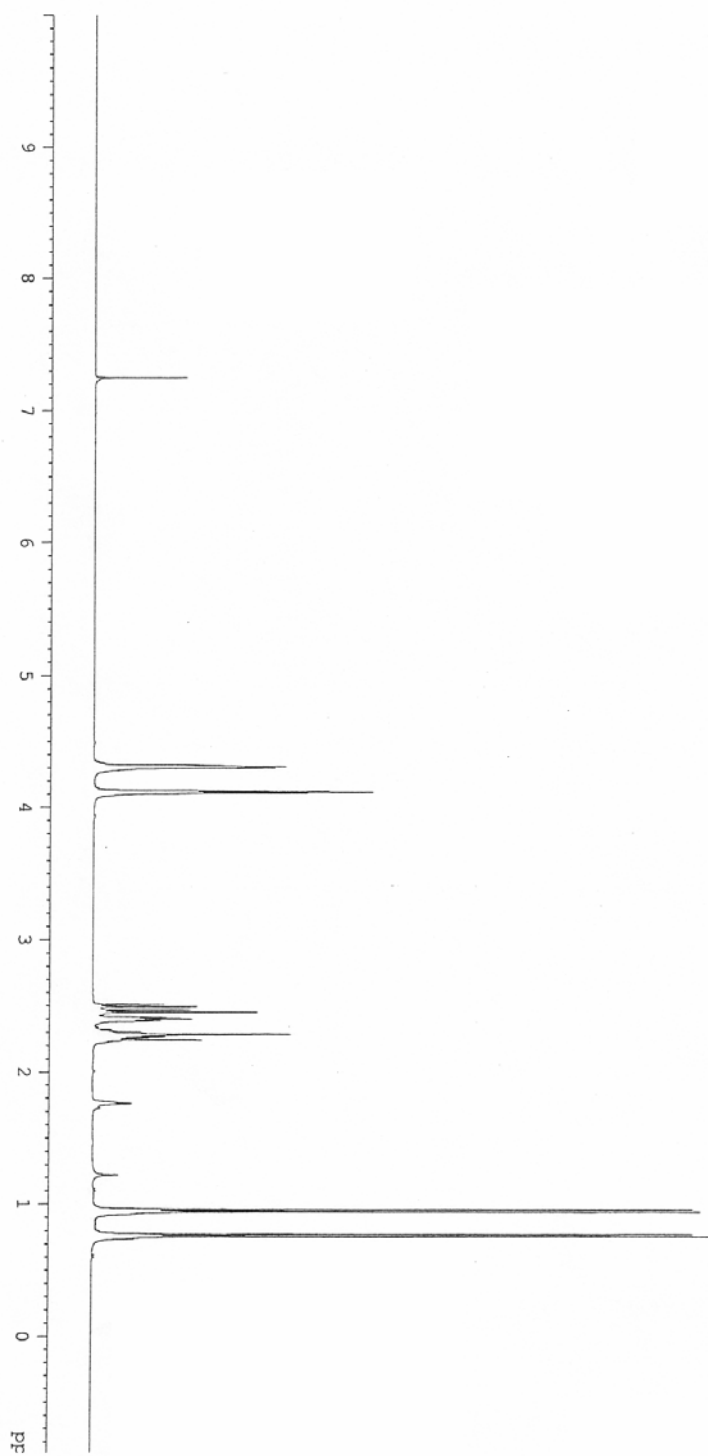

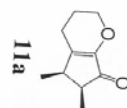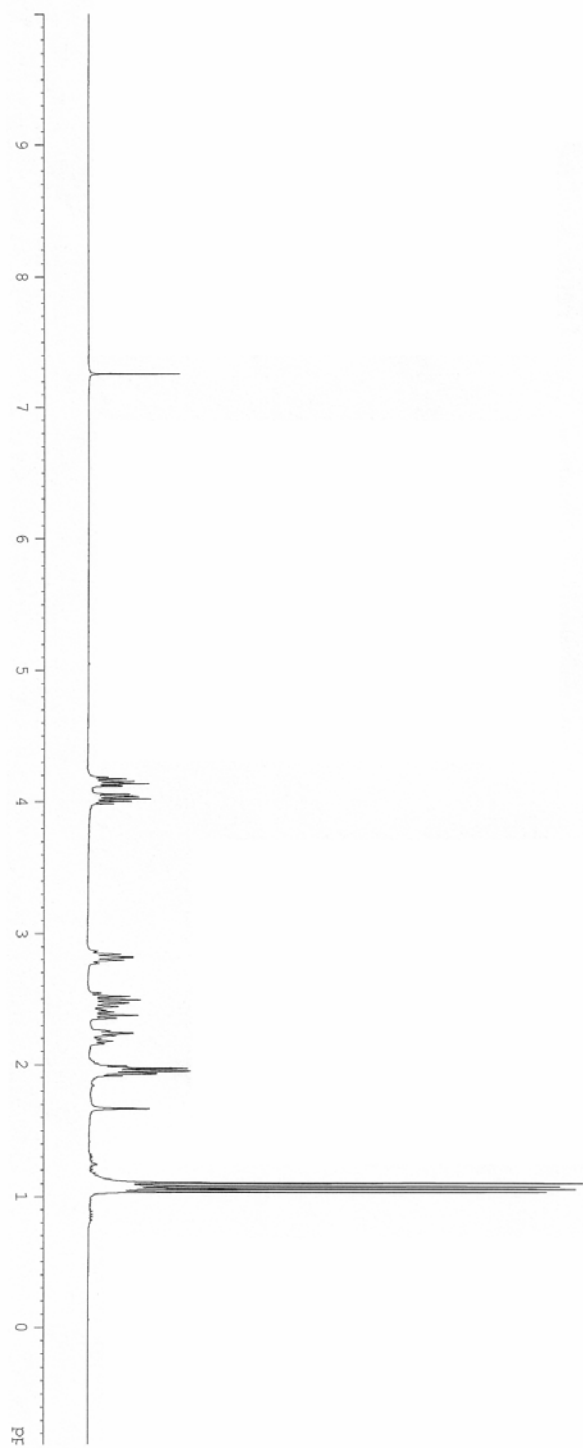

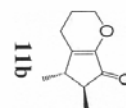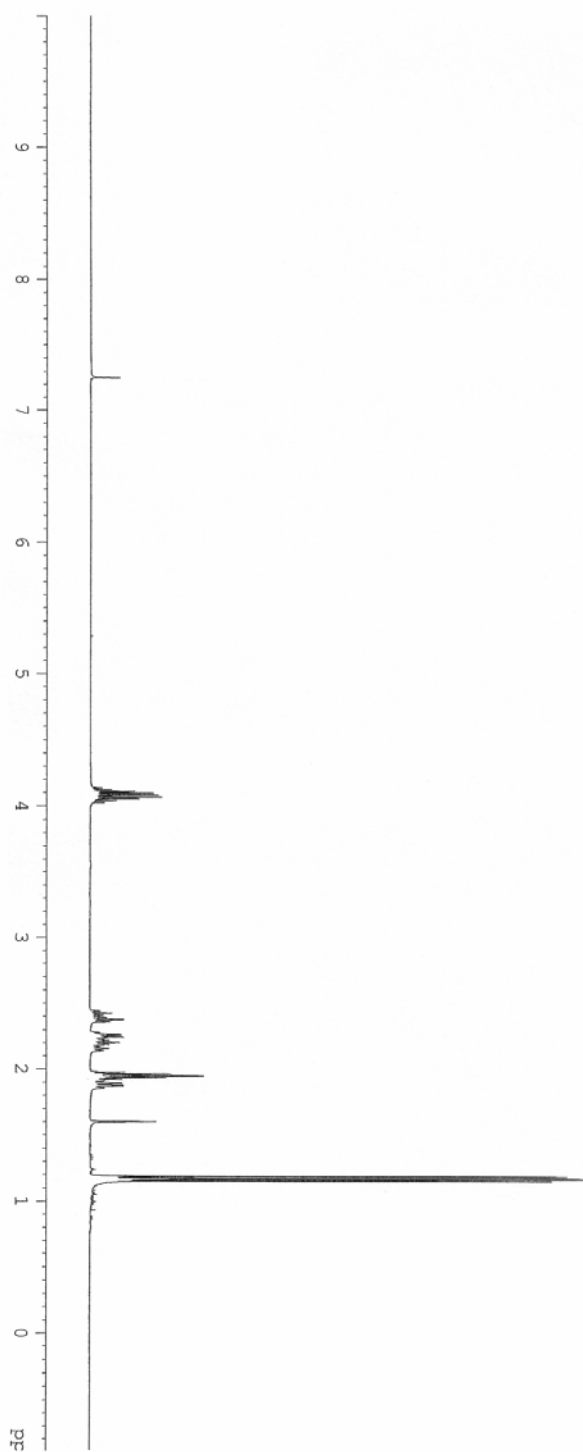

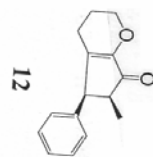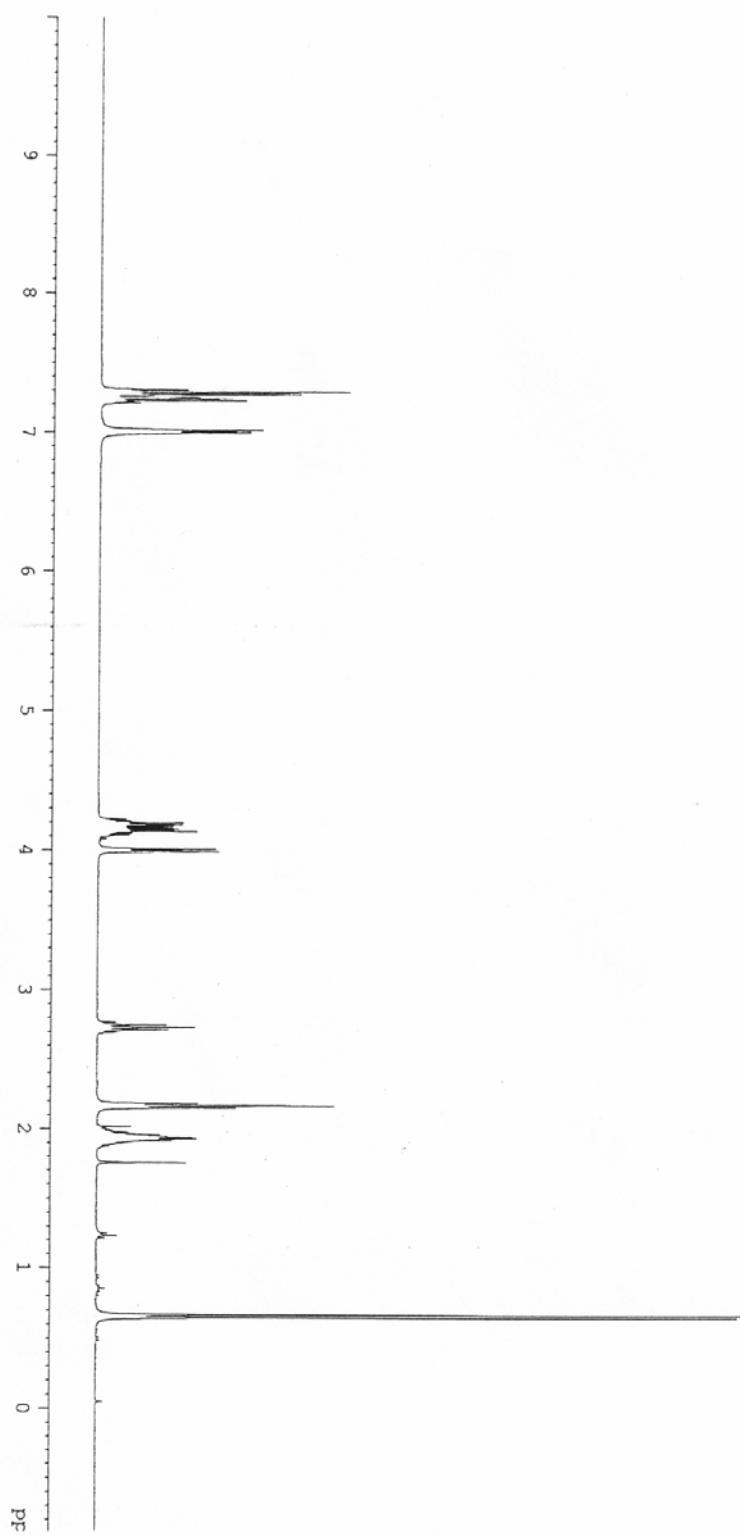

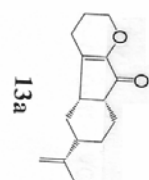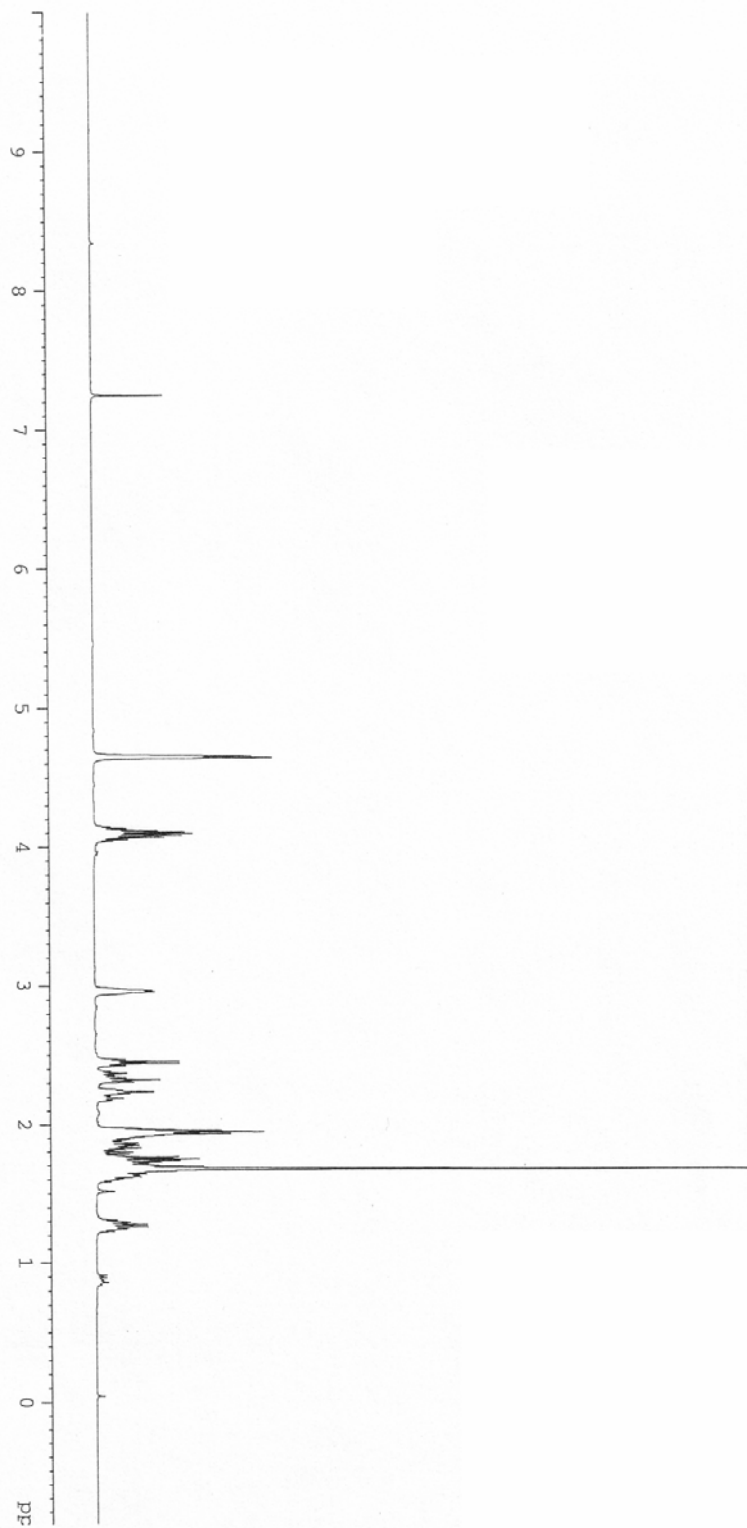

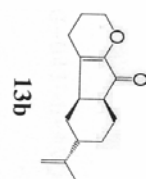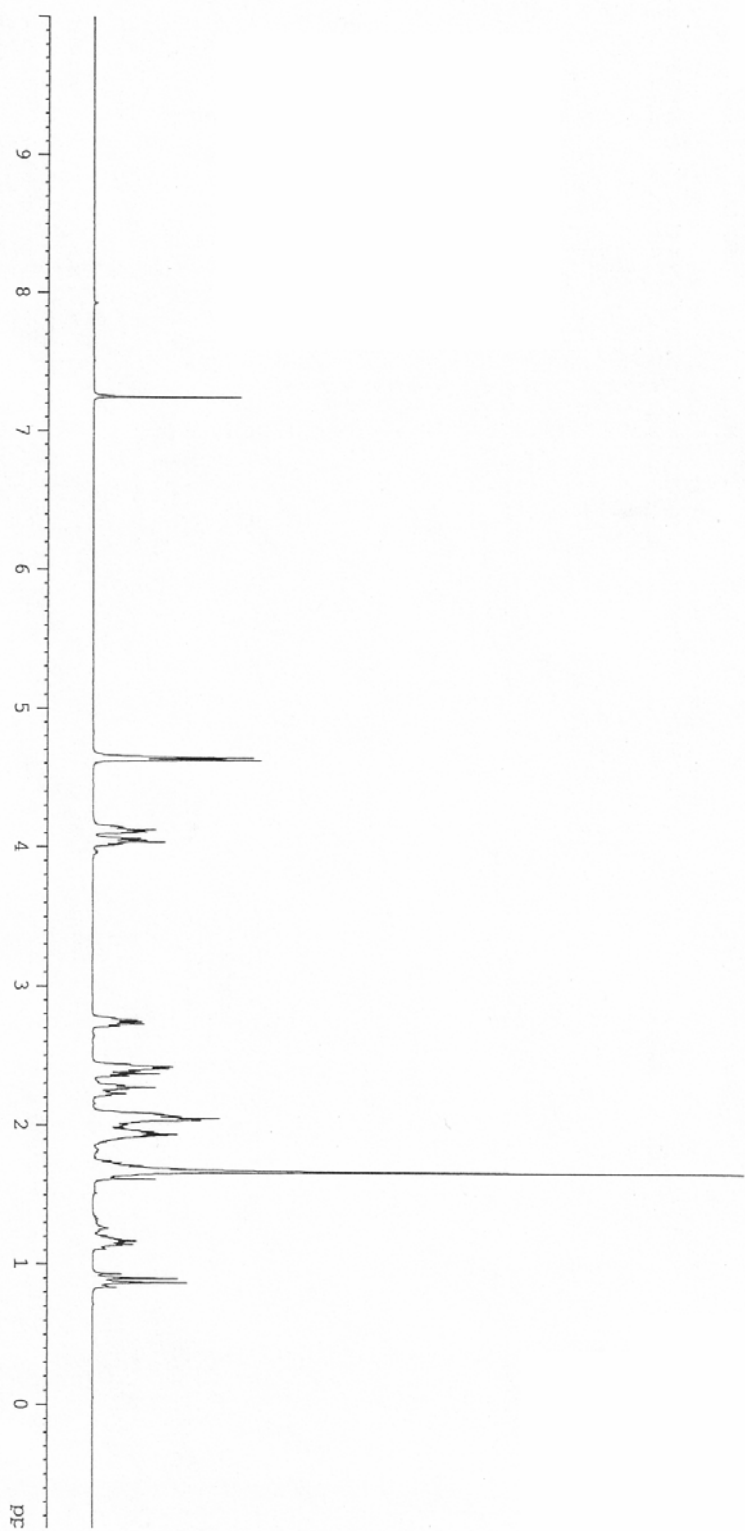

## EXPERIMENTAL DETAILS

### A. Crystal Data

|                         |                                                                                                                                                          |
|-------------------------|----------------------------------------------------------------------------------------------------------------------------------------------------------|
| Empirical Formula       | $\text{O}_2\text{C}_{15}\text{H}_{16}$                                                                                                                   |
| Formula Weight          | 228.29                                                                                                                                                   |
| Crystal Color, Habit    | colorless, blade                                                                                                                                         |
| Crystal Dimensions      | 0.43 X 0.22 X 0.08 mm                                                                                                                                    |
| Crystal System          | monoclinic                                                                                                                                               |
| Lattice Type            | Primitive                                                                                                                                                |
| Lattice Parameters      | $a = 6.4685(7) \text{ \AA}$<br>$b = 11.794(1) \text{ \AA}$<br>$c = 15.938(2) \text{ \AA}$<br>$\beta = 100.876(2)^\circ$<br>$V = 1194.1(2) \text{ \AA}^3$ |
| Space Group             | $\text{P2}_1/\text{c}$ (#14)                                                                                                                             |
| Z value                 | 4                                                                                                                                                        |
| $D_{\text{calc}}$       | $1.270 \text{ g/cm}^3$                                                                                                                                   |
| $T_{\text{000}}$        | 488.00                                                                                                                                                   |
| $\mu(\text{MoK}\alpha)$ | $0.83 \text{ cm}^{-1}$                                                                                                                                   |

### B. Intensity Measurements

|                             |                                                                                        |
|-----------------------------|----------------------------------------------------------------------------------------|
| Diffractometer              | Bruker SMART CCD                                                                       |
| Radiation                   | $\text{MoK}\alpha$ ( $\lambda = 0.71069 \text{ \AA}$ )<br>graphite monochromated       |
| Detector Position           | 60.00 mm                                                                               |
| Exposure Time               | 10.0 seconds per frame.                                                                |
| Scan Type                   | $\omega$ (0.3 degrees per frame)                                                       |
| $2\theta_{\text{max}}$      | $49.4^\circ$                                                                           |
| No. of Reflections Measured | Total: 5115<br>Unique: 2090 ( $R_{\text{int}} = 0.041$ )                               |
| Corrections                 | Lorentz-polarization<br>Absorption ( $T_{\text{max}} = 0.98$ $T_{\text{min}} = 0.52$ ) |

### C. Structure Solution and Refinement

|                       |                                                                              |
|-----------------------|------------------------------------------------------------------------------|
| Structure Solution    | Direct Methods (SIR97)                                                       |
| Refinement            | Full-matrix least-squares                                                    |
| Function Minimized    | $\sum w( F_o  -  F_c )^2$                                                    |
| Least Squares Weights | $w = \frac{1}{\sigma^2(F_o)} = [\sigma_o^2(F_o) + \frac{v^2}{4} F_o^2]^{-1}$ |
| p-factor              | 0.0300                                                                       |
| Anomalous Dispersion  | All non-hydrogen atoms                                                       |

|                                          |                          |
|------------------------------------------|--------------------------|
| No. Observations ( $I > 3.00\sigma(I)$ ) | 1350                     |
| No. Variables                            | 154                      |
| Reflection/Parameter Ratio               | 8.77                     |
| Residuals: R; Rw; Rall                   | 0.050 ; 0.057; 0.079     |
| Goodness of Fit Indicator                | 1.80                     |
| Max Shift/Error in Final Cycle           | 0.00                     |
| Maximum peak in Final Diff. Map          | 0.21 $e^-/\text{\AA}^3$  |
| Minimum peak in Final Diff. Map          | -0.27 $e^-/\text{\AA}^3$ |



```

=====
Injection Date   : 4/7/03 11:50:50 AM          Seq. Line :    1
Sample Name     : 2-Sc-py-THF-rt              Vial      :   51
Acq. Operator   : G(Trauner)                  Inj       :    1
Acq. Instrument : analytical HPLC              Inj Volume : 5 µl
Acq. Method     : C:\HPCHEM\1\METHODS\ST160.M
Last changed    : 3/11/03 4:11:47 PM by G(Trauner)
Analysis Method : C:\HPCHEM\1\METHODS\GRAD150S.M
Last changed    : 2/10/03 2:10:08 PM by Stefan
=====

```

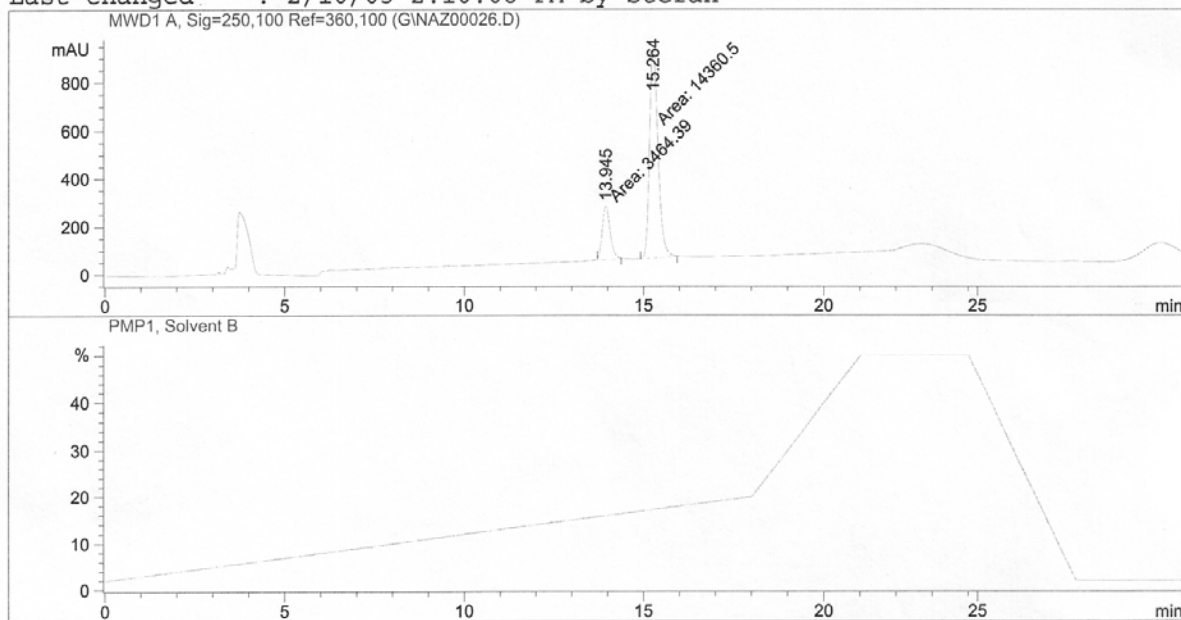

```

=====
                          Area Percent Report
=====

```

```

Sorted By      :      Signal
Multiplier     :      1.0000
Dilution       :      1.0000

```

Signal 1: MWD1 A, Sig=250,100 Ref=360,100

| Peak # | RetTime [min] | Type | Width [min] | Area [mAU*s] | Height [mAU] | Area %  |
|--------|---------------|------|-------------|--------------|--------------|---------|
| 1      | 13.945        | MM T | 0.2554      | 3464.39429   | 226.11496    | 19.4357 |
| 2      | 15.264        | MM T | 0.2763      | 1.43605e4    | 866.36719    | 80.5643 |

Totals : 1.78249e4 1092.48215

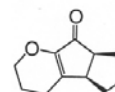

61% e.e.

Results obtained with enhanced integrator!

```

=====
*** End of Report ***

```
